# Supplementary material for: Wide-range color-tunable polycyclo-heteraborin multi-resonance emitters containing B–N covalent bonds
Source: Royal Society of Chemistry journal article supplement (doi:10.1039/d2sc06343c), 2022-12-19
Supplement: d2sc06343c1.pdf [file d2sc06343c1.pdf]

## Supporting Information

### Wide-Range Color-Tunable Polycyclo-heteraborin Multi-resonance Emitters Containing B-N Covalent Bonds

Guoyun Meng,<sup>‡a</sup> Hengyi Dai,<sup>‡a</sup> Jianping Zhou,<sup>a</sup> Tianyu Huang,<sup>a</sup> Xuan Zeng,<sup>a</sup> Qi Wang,<sup>a</sup>  
Xiang Wang,<sup>a</sup> Yuewei Zhang,<sup>a</sup> Tianjiao Fan,<sup>a</sup> Dezhi Yang,<sup>c</sup> Dongge Ma,<sup>c</sup> Dongdong  
Zhang,<sup>\*a</sup> and Lian Duan<sup>\*a,b</sup>

<sup>a</sup> Dr. G. Meng, H. Dai, J. Zhou, T. Huang, Dr. X. Zeng, Q. Wang, Dr. X. Wang, Dr. Y.  
Zhang, T. Fan, Dr. D. Zhang, Prof. L. Duan

Key Lab of Organic Optoelectronics and Molecular Engineering of Ministry of  
Education, Department of Chemistry

Tsinghua University

Beijing, 100084, P. R. China

E-mail: [ddzhang@mail.tsinghua.edu.cn](mailto:ddzhang@mail.tsinghua.edu.cn); [duanl@mail.tsinghua.edu.cn](mailto:duanl@mail.tsinghua.edu.cn)

<sup>b</sup> Prof. L. Duan

Laboratory of Flexible Electronics Technology, Tsinghua University, Beijing, 100084,  
P. R. China

<sup>c</sup> Prof. D. Ma, Dr. D. Yang

Institute of Polymer Optoelectronic Materials and Devices State Key Laboratory of  
Luminescent Materials and Devices, South China University of Technology,  
Guangzhou, 510640, P. R. China

<sup>‡</sup> These authors contributed equally to this work.

## **Table of Contents**

|                                                                           |           |
|---------------------------------------------------------------------------|-----------|
| <b>1. Experimental section .....</b>                                      | <b>1</b>  |
| <b>1.1 General information .....</b>                                      | <b>1</b>  |
| <b>1.2 Computational methods .....</b>                                    | <b>1</b>  |
| <b>1.3 Measurement of absorption and emission characteristics .....</b>   | <b>1</b>  |
| <b>1.4 Electrochemical measurements .....</b>                             | <b>1</b>  |
| <b>1.5 Determination of the emitting dipole orientation .....</b>         | <b>1</b>  |
| <b>1.6 Device fabrication and measurement of EL characteristics .....</b> | <b>1</b>  |
| <b>1.7 Synthesis .....</b>                                                | <b>3</b>  |
| <b>2. Supplementary figures and tables .....</b>                          | <b>8</b>  |
| <b>3. References .....</b>                                                | <b>50</b> |

## 1. Experimental Section

**1.1 General Information.** All reagents used for reaction, purification and measurements were purchased from Shanghai Bide Medical Technology Co. Ltd. All other reagents used for device fabrication were purchased from Jilin Optical and Electronic Materials Co. Ltd. These materials were received and used without further purification. The other reagents and solvents were used as received from commercial sources without further purification. 400, 600, 700 MHz  $^1\text{H}$ -NMR and 150 MHz  $^{13}\text{C}$ -NMR spectra were measured by a JEOL JNM-ECS600 spectrometer at room temperature in deuterated dichloromethane and chloroform respectively with tetramethyl silane as the internal standard. MALDI-TOF-MS data was performed on a Shimadzu AXIMA Performance MALDI-TOF instrument in positive detection modes.

**1.2 Computational methods.** The calculations were performed with the Gaussian 09 package, using the density functional theory (DFT) and time-dependent density functional theory (TD-DFT) method with the B3LYP hybrid functional.<sup>[1-3]</sup> The structures were optimized using TD-DFT ( $S_1$  and  $T_1$  state) methods with a 6-31G(d,p) basis set. Franck-Condon analyses of the emission spectra were performed according to the literature<sup>[4]</sup> using the Gaussian 16 package. Natural transition orbital analyses<sup>[5]</sup> were also performed to examine the nature of the excited states. Electron-hole analysis was carried out using the Multiwfn software.<sup>[6]</sup> The RMSDs of the optimized structures at  $S_0$  and  $S_1$  states were analyzed by VMD software.<sup>[7]</sup> The Huang-Rhys (HR) factors and reorganization energies were calculated using the MOMAP software.<sup>[8]</sup>

**1.3 Measurement of absorption and emission characteristics.**  $1 \times 10^{-5}$  M solutions were prepared by stepwise dilution for solution measurements. Thin films for photophysical characterization were prepared by thermal evaporation on quartz substrates at  $1\text{-}2 \text{ \AA sec}^{-1}$  in a vacuum chamber with a base pressure of  $< 10^{-5}$  torr. UV-vis absorption and PL spectra were measured using UV-2600 (Shimadzu) and FluoroMax-4P (Horiba) instruments at 77 and 298 K. The PLQYs were obtained with an absolute photoluminescence quantum yield: measurement system Hamamatsu C9920-03G in an integrating sphere. The solution sample was bubbled with nitrogen for 10 minutes before measurement while the films were measured in air. The transient spectra were collected on an Edinburgh Fluorescence Spectroscopy FLS1000.

**1.4 Electrochemical measurements.** Cyclic voltammetry was performed on a CHI

660 instrument, using a platinum (Pt) electrode as the working electrode, a Pt wire as the auxiliary electrode and an Ag/Ag<sup>+</sup> electrode as the reference electrode. The oxidation/reduction potentials were measured in dry dichloromethane/DMF solutions with 0.1 M of TBAPF<sub>6</sub> (tetrabutylammonium hexafluorophosphate) as a supporting electrolyte at a scan rate of 100 mV s<sup>-1</sup>.

$$E_{\text{HOMO}} = - (E_{[\text{onset,ox vs. Fc}^+/\text{Fc}]} + 4.8) \text{ (eV)} \quad E_{\text{LUMO}} = - (E_{[\text{onset,red vs. Fc}^+/\text{Fc}]} + 4.8) \text{ (eV)}$$

**1.5 Determination of the emitting dipole orientation.** To determine emitting dipole orientation of an emitting film, angle-resolved and polarization-resolved PL measurements were performed by a setup RSQX-01 made by Changchun Ruoshui Technology Development Co. Ltd. The dipole orientation of doped films was determined by angle-resolved and polarization-resolved PL on a half quartz cylinder prism. A continuous-wave He:Cd laser (325 nm) with a fixed angle of 45° to the substrate was used as excitation source. *p*-Polarized emitted light was detected at the respective peak wavelength of the PL spectrum of each film. The emitting dipole orientation was then determined by least-square fitting of the measured angle-dependent polarized emission intensity with calculated results.

**1.6 Device fabrication and measurement of EL characteristics.** All compounds were subjected to temperature-gradient sublimation under a high vacuum before use. OLEDs were fabricated on the ITO-coated glass substrates with multiple organic layers sandwiched between the transparent bottom indium-tin-oxide (ITO) anode and the top metal cathode. Before device fabrication, the ITO glass substrates were pre-cleaned carefully. All material layers were deposited by vacuum evaporation in a vacuum chamber with a base pressure of 10<sup>-6</sup> torr. The deposition system permits the fabrication of the complete device structure in a single vacuum pump-down without breaking vacuum. The deposition rate of organic layers was kept at 0.1~0.2 nm s<sup>-1</sup>. The doping was conducted by co-evaporation from separate evaporation sources with different evaporation rates. The current density, voltage, luminance, external quantum efficiency, electroluminescent spectra and other characteristics were measured with a Keithley 2400 source meter and an absolute EQE measurement system in an integrating sphere at the same time. The EQE measurement system is Hamamatsu C9920-12, which is equipped with Hamamatsu PMA-12 Photonic multichannel analyzer C10027-02 whose longest detection wavelength is 1100 nm.

## 1.7 Synthesis

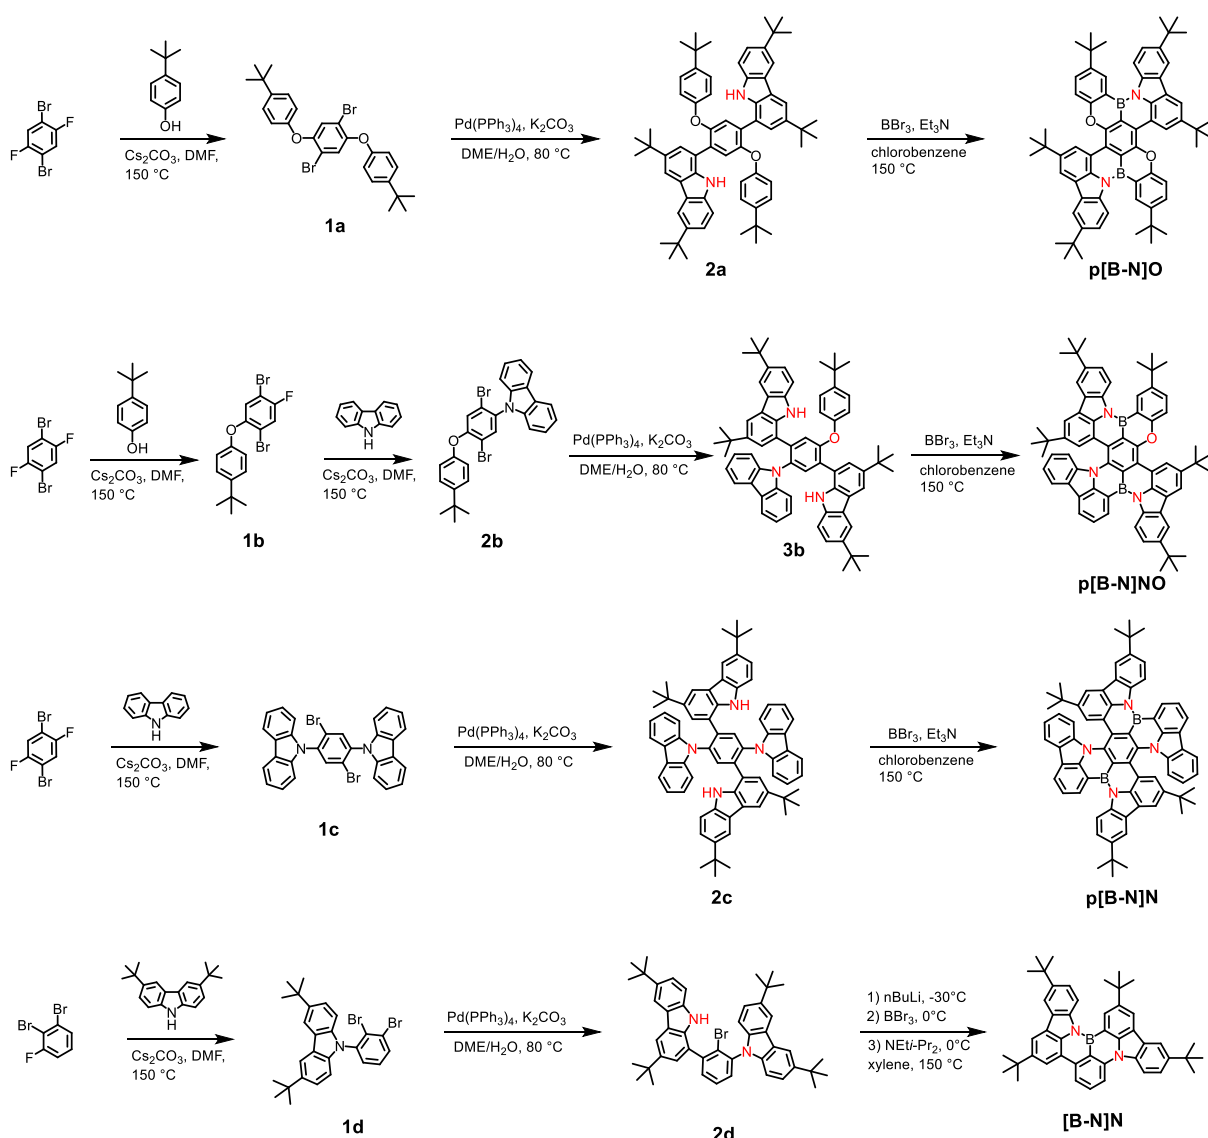

**Scheme S1.** The synthetic routes of **p[B-N]O**, **p[B-N]NO**, **p[B-N]N** and **[B-N]N**.

*Synthesis of 4,4'-((2,5-dibromo-1,4-phenylene)bis(oxy))bis(tert-butylbenzene) (1a):* 4-(tert-butyl)phenol (6.35 g, 42.3 mmol), 1,4-dibromo-2,5-difluorobenzene (5.0 g, 18.4 mmol) and  $\text{CsCO}_3$  (24.0 g, 73.6 mmol) were dissolved in dry DMF (150 mL) at room temperature. The mixture was stirred at  $150\text{ }^\circ\text{C}$  for 18 h. After cooling to room temperature, the reaction mixture was poured into water. After filtration, the crude product was purified by recrystallization from methanol to afford **1a** as white solid, 8.8 g, yield: 90%.  $^1\text{H}$  NMR (700 MHz, Chloroform- $d$ )  $\delta$  (ppm): 7.41 – 7.38 (m, 4H), 7.23 (s, 2H), 6.96 – 6.93 (m, 4H), 1.36 (s, 19H).

*Synthesis of 1,4-dibromo-2-(4-(tert-butyl)phenoxy)-5-fluorobenzene (1b):* Compound **1b** was synthesized according to the same procedure described above for the synthesis of **1a** by using only half of the (tert-butyl)phenol (3.04 g, 20.2 mmol) instead. **1b** was obtained as white solid after recrystallization from methanol, 7.1 g, yield: 87%. <sup>1</sup>H NMR (700 MHz, Chloroform-d) δ (ppm): 7.44 (d, J=7.6, 1H), 7.40 – 7.38 (m, 2H), 7.14 (d, J=6.2, 1H), 6.93 – 6.90 (m, 2H), 1.35 (s, 10H).

*Synthesis of 9-(2,5-dibromo-4-(4-(tert-butyl)phenoxy)phenyl)-9H-carbazole (2b):* Compound **2b** was synthesized according to the same procedure described above for the synthesis of **1a** by using 9H-carbazole (2.29 g, 13.7 mmol) instead (tert-butyl)phenol and using **1b** (5.5 g, 13.7 mmol) instead 1,4-dibromo-2,5-difluorobenzene. **2b** was obtained as white solid, 6.8 g, yield: 91%. <sup>1</sup>H NMR (700 MHz, Chloroform-d) δ (ppm): 8.17 (d, J=7.7, 2H), 7.78 (s, 1H), 7.52 – 7.49 (m, 2H), 7.48 – 7.44 (m, 2H), 7.36 – 7.32 (m, 2H), 7.31 (s, 1H), 7.16 – 7.10 (m, 4H), 1.40 (s, 9H).

*Synthesis of 9,9'-(2,5-dibromo-1,4-phenylene)bis(9H-carbazole) (1c):* Compound **1c** was synthesized according to the same procedure described above for the synthesis of **1a** by using 9H-carbazole (7.07 g, 42.3 mmol) instead (tert-butyl)phenol. **1c** was obtained as white solid, 10.8 g, yield: 90%. <sup>1</sup>H NMR (700 MHz, Chloroform-d) δ (ppm): 8.21 (d, J=7.7, 4H), 8.03 (s, 2H), 7.54 – 7.50 (m, 4H), 7.41 – 7.37 (m, 4H), 7.28 (t, J=4.0, 6H).

*Synthesis of 1,1'-(2,5-bis(4-(tert-butyl)phenoxy)-1,4-phenylene)bis(3,6-di-tert-butyl-9H-carbazole) (2a):* In a 100 mL Schlenk flask, 3,6-di-tert-butyl-1-(4,4,5,5-tetramethyl-1,3,2-dioxaborolan-2-yl)-9H-carbazole (1.5 g, 3.7 mmol) and **1a** (0.82 g, 1.5 mmol) were charged under nitrogen. After adding 20 mL dimethoxyethane and 5 mL K<sub>2</sub>CO<sub>3</sub> (2.1 g, 15.2 mmol) aqueous solution, the mixture was degassed for 30 min. Pd(PPh<sub>3</sub>)<sub>4</sub> (0.18 g, 0.16 mmol) was added, then the mixture was heated to 80 °C and stirred for 4 hours. The reactant was poured into brine and extracted by CH<sub>2</sub>Cl<sub>2</sub> for three times. The organic phase was dried over MgSO<sub>4</sub> and the solvent was evaporated in vacuo. The crude product was purified by flash chromatography on silica gel with petroleum ether / CH<sub>2</sub>Cl<sub>2</sub> (5:1, v/v) to give **2a** as white solid, 1.12 g, yield: 78%. <sup>1</sup>H NMR (700 MHz, DMSO-d<sub>6</sub>) δ (ppm): 10.70 (s, 2H), 8.14 (s, 2H), 8.11 (s, 2H), 7.44 (s, 4H), 7.33 (s, 2H), 7.29 (s, 2H), 7.22 (d, J=8.7, 4H), 6.98 (d, J=8.7, 4H), 1.40 (s,

22H), 1.30 (s, 18H), 1.14 (s, 18H).  $^{13}\text{C}$  NMR (176 MHz, DMSO- $d_6$ )  $\delta$  (PPM): 155.63, 150.02, 145.43, 141.40, 141.01, 139.04, 138.67, 136.73, 131.63, 126.68, 124.32, 123.71, 123.67, 123.48, 123.14, 122.83, 116.55, 116.51, 116.44, 111.17, 110.71, 84.12, 34.89, 34.75, 34.31, 32.40, 32.24, 31.61, 25.22. MALDI-TOF: Calculated: 928.5907, Found: 928.5769.

*Synthesis of 1,1'-(2-(4-(tert-butyl)phenoxy)-5-(9H-carbazol-9-yl)-1,4-phenylene)bis(3,6-di-tert-butyl-9H-carbazole) (3b):* Compound **3b** was synthesized according to the same procedure described above for the synthesis of **2a**. **2b** (0.93 g, 1.7 mmol), 3,6-di-tert-butyl-1-(4,4,5,5-tetramethyl-1,3,2-dioxaborolan-2-yl)-9H-carbazole (1.65 g, 4.1 mmol), Pd(PPh<sub>3</sub>)<sub>4</sub> (0.20 g, 0.17 mmol) and K<sub>2</sub>CO<sub>3</sub> (2.34 g, 16.9 mmol), and obtained **3b** as white solid, 1.4 g, yield: 86%.  $^1\text{H}$  NMR (600 MHz, DMSO- $d_6$ )  $\delta$  (ppm): 10.92 (s, 1H), 10.84 (s, 1H), 8.16 – 8.13 (m, 2H), 7.98 (d,  $J = 25.1$  Hz, 3H), 7.84 (s, 1H), 7.70 (d,  $J = 1.6$  Hz, 1H), 7.44 (d,  $J = 6.4$  Hz, 4H), 7.39 (s, 2H), 7.29 – 7.21 (m, 5H), 7.18 – 6.85 (m, 3H), 6.50 (d,  $J = 1.7$  Hz, 1H), 1.37 (s, 9H), 1.34 (s, 9H), 1.33 (s, 9H), 1.10 (s, 9H), 0.67 (s, 9H).  $^{13}\text{C}$  NMR (151 MHz, DMSO- $d_6$ )  $\delta$  (ppm): 155.00, 154.14, 146.56, 141.48, 141.31, 140.70, 139.20, 138.93, 137.17, 136.32, 133.39, 130.99, 130.11, 126.91, 124.59, 123.75, 123.71, 123.55, 123.00, 122.96, 122.88, 122.21, 120.59, 120.50, 120.00, 119.81, 119.43, 116.67, 116.62, 116.35, 111.29, 111.18, 110.32, 34.96, 34.93, 34.90, 34.08, 32.48, 32.42, 31.64, 31.50. MALDI-TOF: Calculated: 945.5597, Found: 945.5621.

*Synthesis of 9,9'-(2,5-bis(3,6-di-tert-butyl-9H-carbazol-1-yl)-1,4-phenylene)bis(9H-carbazole) (2c):* Compound **2c** was synthesized according to the same procedure described above for the synthesis of **2a**. **1c** (0.85 g, 1.5 mmol), 3,6-di-tert-butyl-1-(4,4,5,5-tetramethyl-1,3,2-dioxaborolan-2-yl)-9H-carbazole (1.46 g, 3.6 mmol), Pd(PPh<sub>3</sub>)<sub>4</sub> (0.17 g, 0.15 mmol) and K<sub>2</sub>CO<sub>3</sub> (2.07 g, 54.2 mmol), and obtained **2c** as white solid, 1.2 g, yield: 86%.  $^1\text{H}$  NMR (600 MHz, Chloroform- $d$ )  $\delta$  (ppm): 8.33 (s, 2H), 7.99 (d,  $J = 7.7$  Hz, 4H), 7.93 – 7.83 (m, 4H), 7.76 (d,  $J = 1.7$  Hz, 2H), 7.45 – 7.31 (m, 6H), 7.23 (d,  $J = 8.0$  Hz, 2H), 7.16 (t,  $J = 7.2$  Hz, 4H), 7.07 – 6.98 (m, 4H), 1.39 (s, 18H), 0.98 (s, 18H).  $^{13}\text{C}$  NMR (151 MHz, Chloroform- $d$ )  $\delta$  (ppm): 142.47, 142.38, 138.35, 137.85, 135.66, 135.39, 132.65, 125.98, 124.01, 123.77, 123.62, 123.54, 123.22, 120.37, 119.24, 116.34, 116.17, 110.06, 109.76, 34.27, 31.45. MALDI-TOF: Calculated: 962.5287, Found: 962.5792.

*Synthesis of 3,6-di-tert-butyl-9-(2,3-dibromophenyl)-9H-carbazole (1d):* Compound **1d**

was synthesized according to the same procedure described above for the synthesis of **1a** by using 3,6-di-tert-butyl-9H-carbazole instead (tert-butyl)phenol (0.85 g, 3.0 mmol). **1d** was obtained as white solid, 1.4 g, yield: 90%. <sup>1</sup>H NMR (700 MHz, Chloroform-d)  $\delta$  (ppm): 8.17 (d,  $J = 1.6$  Hz, 2H), 7.83 (dd,  $J = 7.8, 1.8$  Hz, 1H), 7.47 (dd,  $J = 8.5, 1.8$  Hz, 2H), 7.43 – 7.37 (m, 2H), 6.99 (d,  $J = 8.5$  Hz, 2H), 1.49 (s, 18H).

*Synthesis of 1-(2-bromo-3-(3,6-di-tert-butyl-9H-carbazol-9-yl)phenyl)-3,6-di-tert-butyl-9H-carbazole (2d):* Compound **2d** was synthesized according to the same procedure described above for the synthesis of **2a**, **1d** (1.0 g, 1.95 mmol), 3,6-di-tert-butyl-1-(4,4,5,5-tetramethyl-1,3,2-dioxaborolan-2-yl)-9H-carbazole (0.95 g, 2.34 mmol), Pd(PPh<sub>3</sub>)<sub>4</sub> (0.23 g, 0.2 mmol) and K<sub>2</sub>CO<sub>3</sub> (1.35 g, 9.77 mmol), and obtained as **2d** white solid, 1.1 g, yield: 76%. <sup>1</sup>H NMR (700 MHz, DMSO-d<sub>6</sub>)  $\delta$  (ppm): 10.76 (s, 1H), 8.28 (d,  $J = 1.5$  Hz, 2H), 8.21 (dd,  $J = 20.5, 1.4$  Hz, 2H), 7.77 (t,  $J = 7.6$  Hz, 1H), 7.72 (dd,  $J = 7.6, 1.6$  Hz, 1H), 7.63 (dd,  $J = 7.7, 1.6$  Hz, 1H), 7.49 (dd,  $J = 19.0, 8.3$  Hz, 2H), 7.45 (dd,  $J = 8.6, 1.8$  Hz, 1H), 7.41 – 7.38 (m, 2H), 7.04 (d,  $J = 8.3$  Hz, 1H), 1.46 – 1.41 (m, 36H). <sup>13</sup>C NMR (176 MHz, DMSO-d<sub>6</sub>)  $\delta$  (ppm): 142.95, 142.66, 141.43, 141.12, 139.60, 139.44, 139.07, 137.66, 132.56, 130.61, 129.57, 125.63, 124.30, 124.08, 123.96, 123.86, 123.69, 123.41, 123.10, 123.00, 122.94, 117.09, 117.01, 116.59, 111.09, 110.60, 109.73, 34.99, 34.96, 34.90, 32.43, 32.41, 32.37.

*Synthesis of p[B-N]O:* A mixture of **2a** (1.0 g, 1.1 mmol), triethylamine (0.4 mL, 4.16 mmol) in chlorobenzene (15 mL) was stirred at room temperature for 10 minutes. Then, BBr<sub>3</sub> (0.6 mL, 4.16 mmol) was dropwise added to the reaction mixture. The reaction mixture was heated up to 150 °C for 12 hours. After cooling to room temperature, toluene was added to the reaction mixture. Then, insoluble moieties were removed by filtration. After removed the solvent in vacuo, the solid materials were washed with hexane, collected by filtration. The obtained solid was sonicated with methanol, collected by filtration to give the title compound **p[B-N]O** as bright yellow solid, 0.91 g, yield: 90%. <sup>1</sup>H NMR (400 MHz, Methylene Chloride-d<sub>2</sub>)  $\delta$  (ppm): 9.69 (d,  $J = 1.7$ , 2H), 8.64 (d,  $J = 2.4$ , 2H), 8.29 (d,  $J = 8.6$ , 2H), 8.22 (dd,  $J = 10.5, 1.8$ , 4H), 7.77 (dd,  $J = 8.7, 2.4$ , 2H), 7.70 (d,  $J = 8.7$ , 2H), 7.54 (dd,  $J = 8.6, 2.0$ , 2H), 1.66 (s, 18H), 1.53 (s, 18H), 1.42 (s, 19H). <sup>13</sup>C NMR (101 MHz, Methylene Chloride-d<sub>2</sub>)  $\delta$  = 158.95, 151.26, 146.94, 145.76, 144.48, 140.85, 138.01, 131.03, 130.16, 129.45, 125.88, 124.78, 123.34,



121.41, 121.09, 117.39, 116.88, 116.61, 116.41, 35.52, 34.91, 34.73, 32.27, 31.67, 31.44. MALDI-TOF: Calculated: 944.5623, Found: 944.7152. Anal. Calcd (%) for C<sub>66</sub>H<sub>70</sub>B<sub>2</sub>N<sub>2</sub>O<sub>2</sub>: C, 83.89; H, 7.47; B, 2.29; N, 2.96; O, 3.39 Found: C, 83.85; H, 7.41; B, 2.25; N, 2.99; O, 3.42.

*Synthesis of p[B-N]NO*: Compound **p[B-N]NO** was synthesized according to the same procedure described above for the synthesis of **p[B-N]O**, **3b** (0.88 g, 0.93 mmol), triethylamine (1.29 mL, 9.3 mmol) in chlorobenzene (15 mL), BBr<sub>3</sub> (0.35 mL, 3.7 mmol) and obtained as blight yellow solid, 0.65 g, yield: 72%. <sup>1</sup>H NMR (400 MHz, Methylene Chloride-d<sub>2</sub>) δ (ppm): 9.75 (d, J=1.6, 1H), 8.98 (d, J=7.5, 1H), 8.76 (d, J=2.1, 1H), 8.63 (d, J=8.6, 1H), 8.46 (d, J=7.2, 1H), 8.30 (d, J=1.7, 1H), 8.29 – 8.24 (m, 2H), 8.20 – 8.16 (m, 2H), 7.99 (d, J=1.6, 1H), 7.82 (d, J=8.7, 1H), 7.77 – 7.69 (m, 2H), 7.63 (dd, J=8.7, 1.9, 1H), 7.51 (dd, J=8.6, 1.8, 1H), 7.20 (t, J=7.4, 1H), 7.07 (d, J=1.6, 1H), 6.85 (t, J=7.8, 1H), 6.64 (d, J=8.3, 1H), 1.66 (s, 9H), 1.54 (s, 9H), 1.52 (s, 9H), 1.36 (s, 9H), 0.85 (s, 9H). <sup>13</sup>C NMR (151 MHz, Methylene Chloride-d<sub>2</sub>) δ = 159.23, 152.50, 147.22, 147.08, 145.99, 145.02, 144.89, 144.59, 141.68, 141.39, 138.66, 137.81, 137.37, 132.40, 131.90, 131.21, 130.27, 129.70, 129.51, 126.00, 125.98, 125.84, 125.10, 124.59, 124.24, 123.82, 123.72, 123.56, 122.76, 122.34, 121.87, 121.46, 121.30, 121.22, 120.62, 120.35, 117.65, 117.06, 116.89, 116.80, 116.47, 116.22, 116.02, 115.81, 35.55, 34.94, 34.91, 34.78, 34.41, 32.24, 31.66, 31.40, 31.03. MALDI-TOF: Calculated: 961.5314, Found: 961.7857. Anal. Calcd (%) for C<sub>68</sub>H<sub>65</sub>B<sub>2</sub>N<sub>3</sub>O: C, 84.91; H, 6.81; B, 2.25; N, 4.37; O, 1.66; Found: C, 84.97; H, 6.83; B, 2.21; N, 4.36; O, 1.61.

*Synthesis of p[B-N]N*: Compound **p[B-N]N** was synthesized according to the same procedure described above for the synthesis of **p[B-N]O**, **2c** (1.0 g, 1.0 mmol), triethylamine (1.44 mL, 10.0 mmol) in chlorobenzene (15 mL), BBr<sub>3</sub> (0.39 mL, 4.0 mmol) and obtained as blight red solid, 0.93 g, yield: 92%. <sup>1</sup>H NMR (400 MHz, Methylene Chloride-d<sub>2</sub>) δ (ppm): 9.06 (d, J=7.5, 2H), 8.65 (d, J=8.6, 2H), 8.48 (d, J=7.3, 2H), 8.23 – 8.14 (m, 4H), 8.00 (d, J=1.5, 2H), 7.72 (t, J=7.5, 2H), 7.66 (dd, J=8.6, 1.8, 2H), 7.19 (t, J=7.4, 2H), 7.00 (d, J=1.5, 2H), 6.81 (t, J=7.8, 2H), 6.63 (d, J=8.3, 2H), 1.52 (s, 18H), 0.84 (s, 18H). <sup>13</sup>C NMR (101 MHz, Methylene Chloride-d<sub>2</sub>) δ = 147.15, 144.70, 142.27, 138.35, 137.37, 132.66, 132.46, 129.84, 125.95, 125.90, 125.41, 124.46, 123.77, 122.46, 122.07, 121.67, 121.32, 120.59, 120.38, 117.15, 116.21, 116.04, 115.80, 34.94, 34.38, 31.66, 31.05. MALDI-TOF: Calculated: 978.5004, Found:

978.8860. Anal. Calcd (%) for  $C_{70}H_{60}B_2N_4$ : C, 85.89; H, 6.18; B, 2.21; N, 5.72; Found: C, 85.83; H, 6.12; B, 2.25; N, 5.77.

**Synthesis of [B-N]N:** A solution of butyllithium in hexane (1.6 M, 5.27 mL, 8.42 mmol) was added slowly to a solution of **2d** (3.0 g, 4.21 mmol) in xylene (50 mL) at  $-30\text{ }^\circ\text{C}$  under a nitrogen atmosphere and maintained for 2 hours, boron tribromide (0.48 mL, 5.05 mmol) was added at  $-30\text{ }^\circ\text{C}$ . After the reaction mixture was allowed to warm to room temperature and stirred for 1 h. *N,N*-diisopropylethylamine (1.39 mL, 8.42 mmol) was added at  $0\text{ }^\circ\text{C}$ , the reaction mixture was stirred at  $150\text{ }^\circ\text{C}$  for 24 h. Upon being cooled to room temperature, the precipitate was separated by filtration and recrystallized in methanol/dichloromethane to give the pale yellow solid, 1.13 g, yield: 42%.  $^1\text{H}$  NMR (700 MHz, Methylene Chloride- $d_2$ )  $\delta$  (ppm): 8.97 (s, 1H), 8.62 (d,  $J = 8.5$  Hz, 1H), 8.48 (s, 2H), 8.39 (s, 1H), 8.34 – 8.23 (m, 5H), 7.91 (t,  $J = 7.5$  Hz, 1H), 7.70 (d,  $J = 9.5$  Hz, 1H), 7.62 (d,  $J = 8.5$  Hz, 1H), 1.64 (d,  $J = 7.0$  Hz, 18H), 1.57 (d,  $J = 2.8$  Hz, 18H).  $^{13}\text{C}$  NMR (176 MHz, Methylene Chloride- $d_2$ )  $\delta$  (ppm): 146.71, 145.84, 145.10, 143.99, 143.85, 143.22, 141.89, 138.70, 137.81, 137.56, 131.58, 129.59, 128.87, 126.78, 126.49, 125.07, 123.65, 123.59, 120.30, 118.33, 117.32, 117.11, 116.92, 115.42, 115.14, 113.98, 112.25, 35.23, 35.20, 34.83, 34.70, 31.95, 31.93, 31.62, 31.58. MALDI-TOF: Calculated: 640.3989, Found: 640.5559. Anal. Calcd (%) for  $C_{46}H_{49}BN_2$ : C, 86.23; H, 7.71; B, 1.69; N, 4.37; Found: C, 86.01; H, 7.82; B, 1.57; N, 4.53.

## 2. Supplementary figures and tables

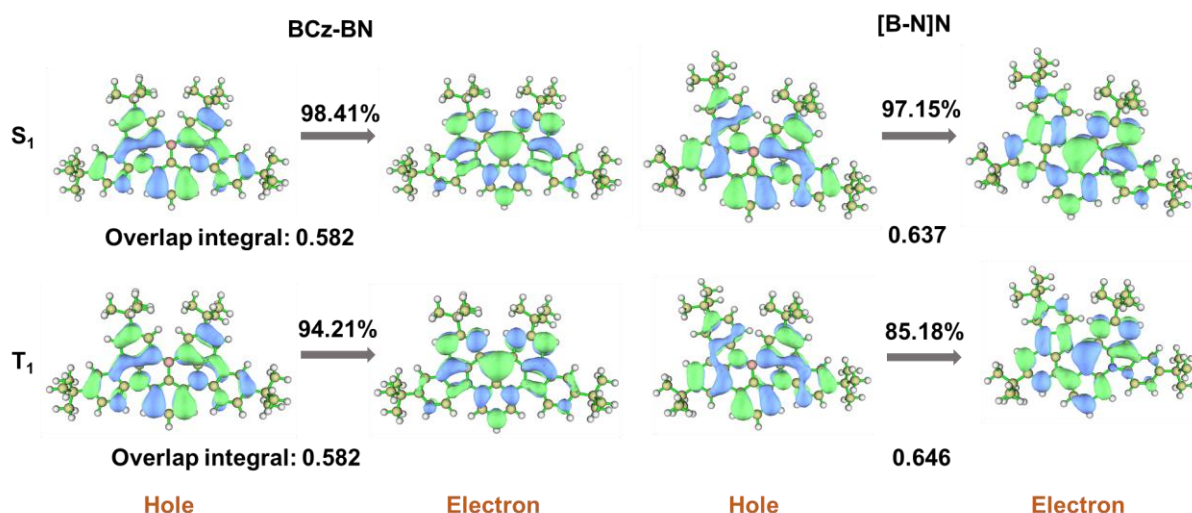

**Figure S1.** Natural Transition Orbitals (NTO) describing the excitation characters of the  $S_1$  and  $T_1$  states in BCzBN and [B-N]N. The weights of the hole-electron contributions to the excitations and the overlap integral of the two orbitals are included.

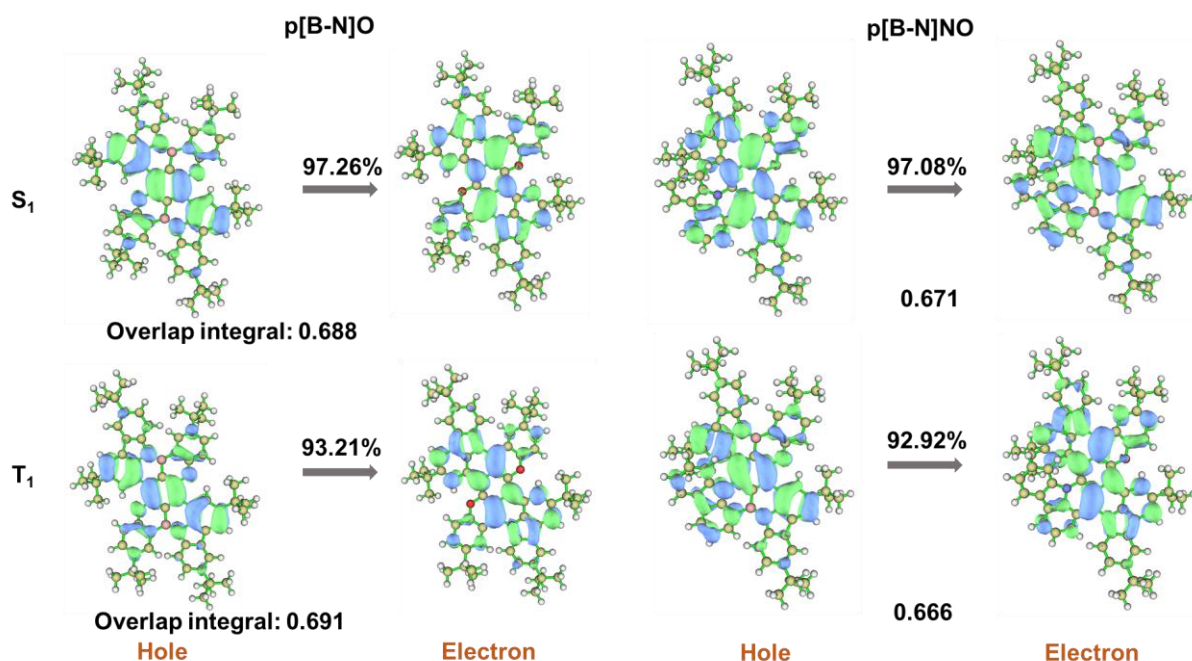

**Figure S2.** Natural Transition Orbitals (NTO) describing the excitation characters of the  $S_1$  and  $T_1$  states in p[B-N]O and p[B-N]NO. The weights of the hole-electron contributions to the excitations and the overlap integral of the two orbitals are included.

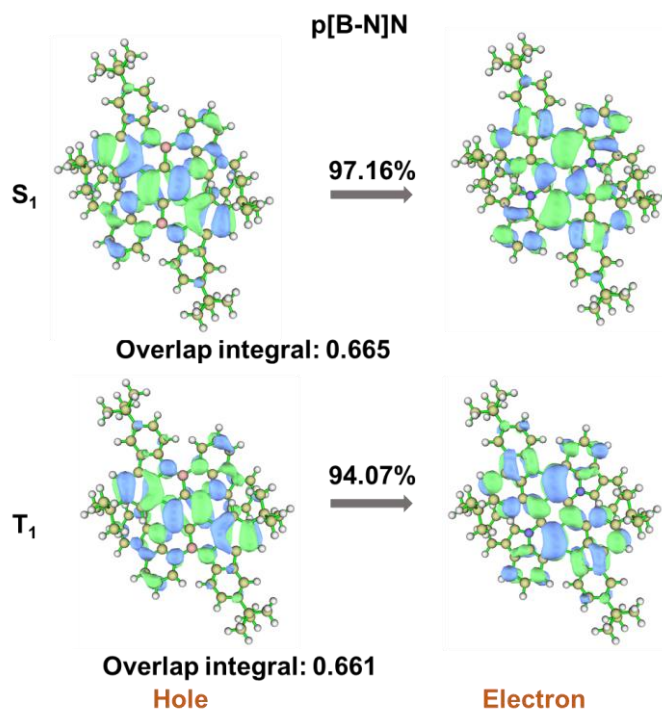

**Figure S3.** Natural Transition Orbitals (NTO) describing the excitation characters of the  $S_1$  and  $T_1$  states in  $p[B-N]N$ . The weights of the hole-electron contributions to the excitations and the overlap integral of the two orbitals are included.

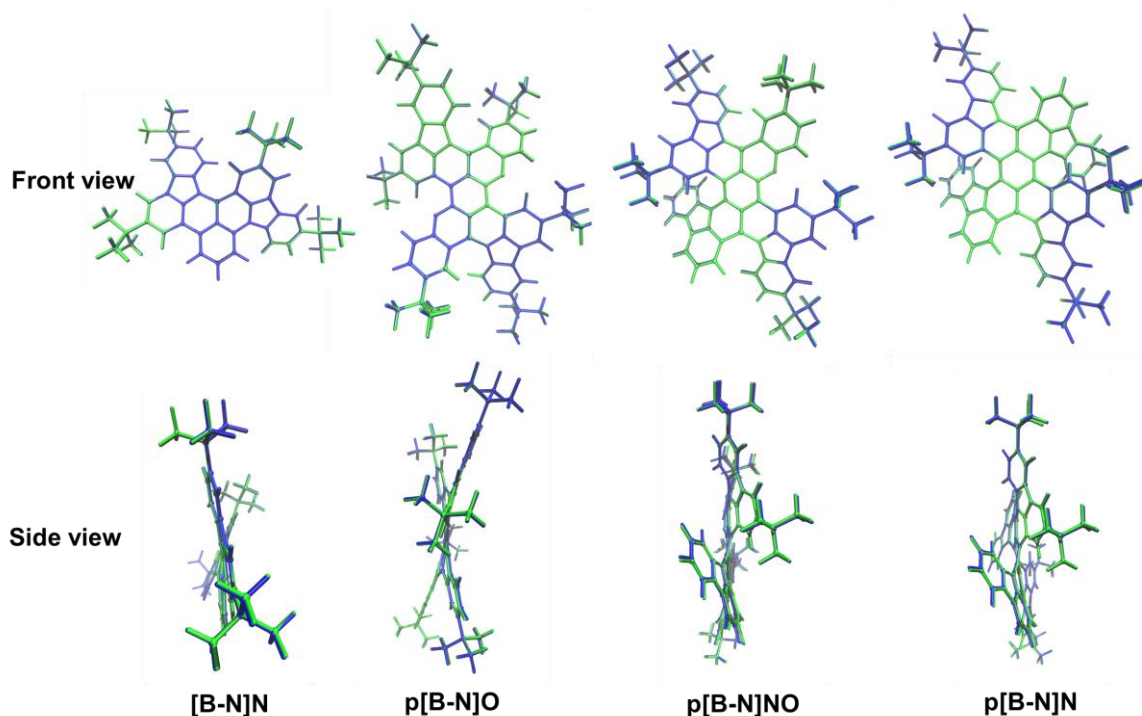

**Figure S4.** Comparison of the optimized structures of  $[B-N]N$ ,  $p[B-N]O$ ,  $p[B-N]NO$  and  $p[B-N]N$  in the  $S_0$  (blue) and  $S_1$  (green) states.

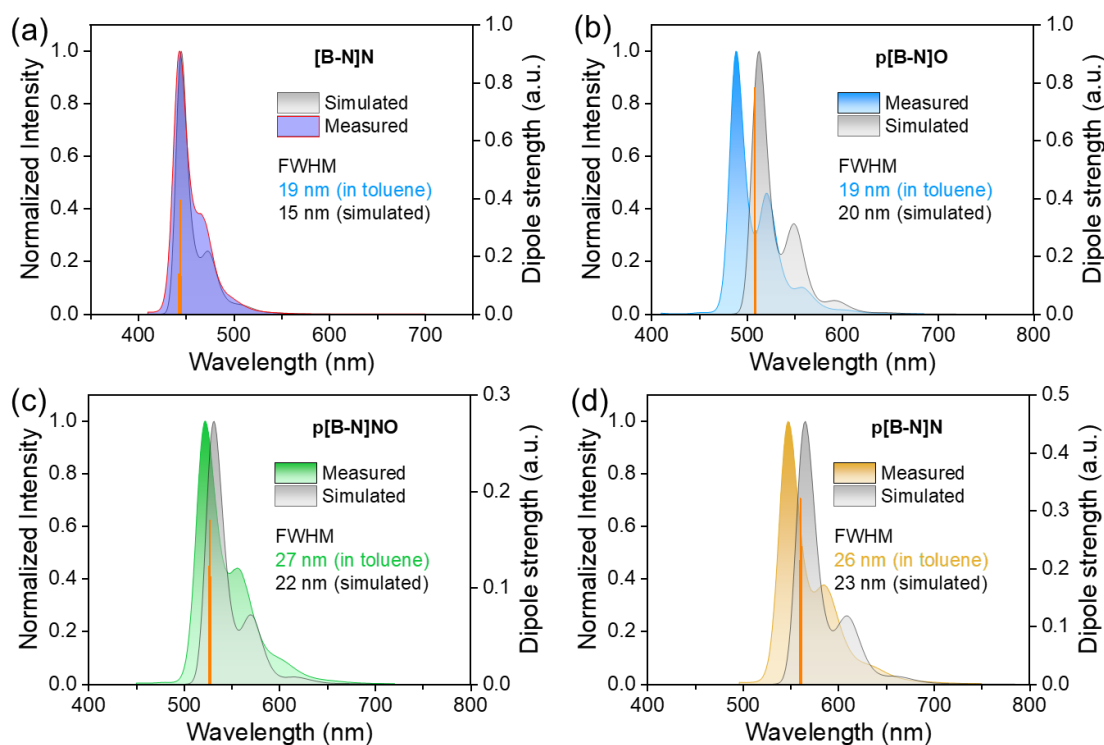

**Figure S5.** Contrast of emission spectra measured in toluene solution and emission spectra simulated by Franck-Condon analysis on the  $S_1$ - $S_0$  transition of (a)  $[B-N]N$ , (b)  $p[B-N]O$ , (c)  $p[B-N]NO$ , and (d)  $p[B-N]N$ .

**p[B-N]NO** and (d) **p[B-N]N**. Band broadening simulated by mean of Gaussian functions with half-widths at half-maximum of  $300\text{ cm}^{-1}$ .

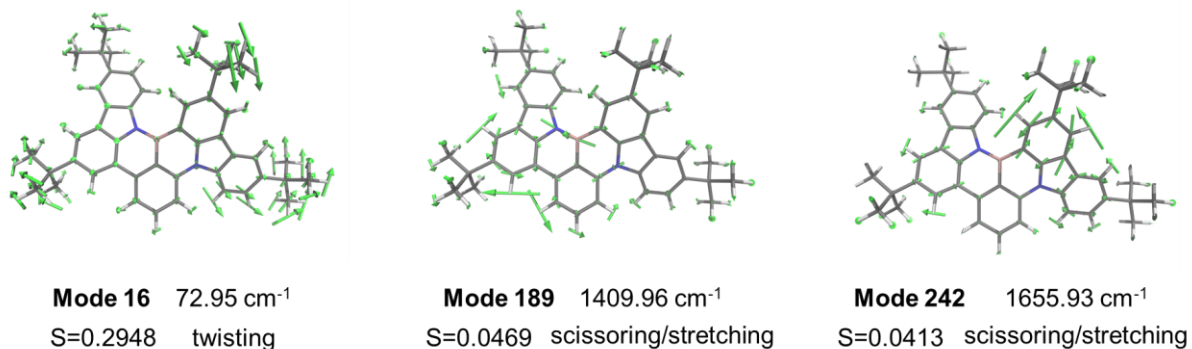

**Figure S6.** Normal vibrational modes in the  $S_0$  state involved in the Franck-Condon spectral progression of **[B-N]N**.

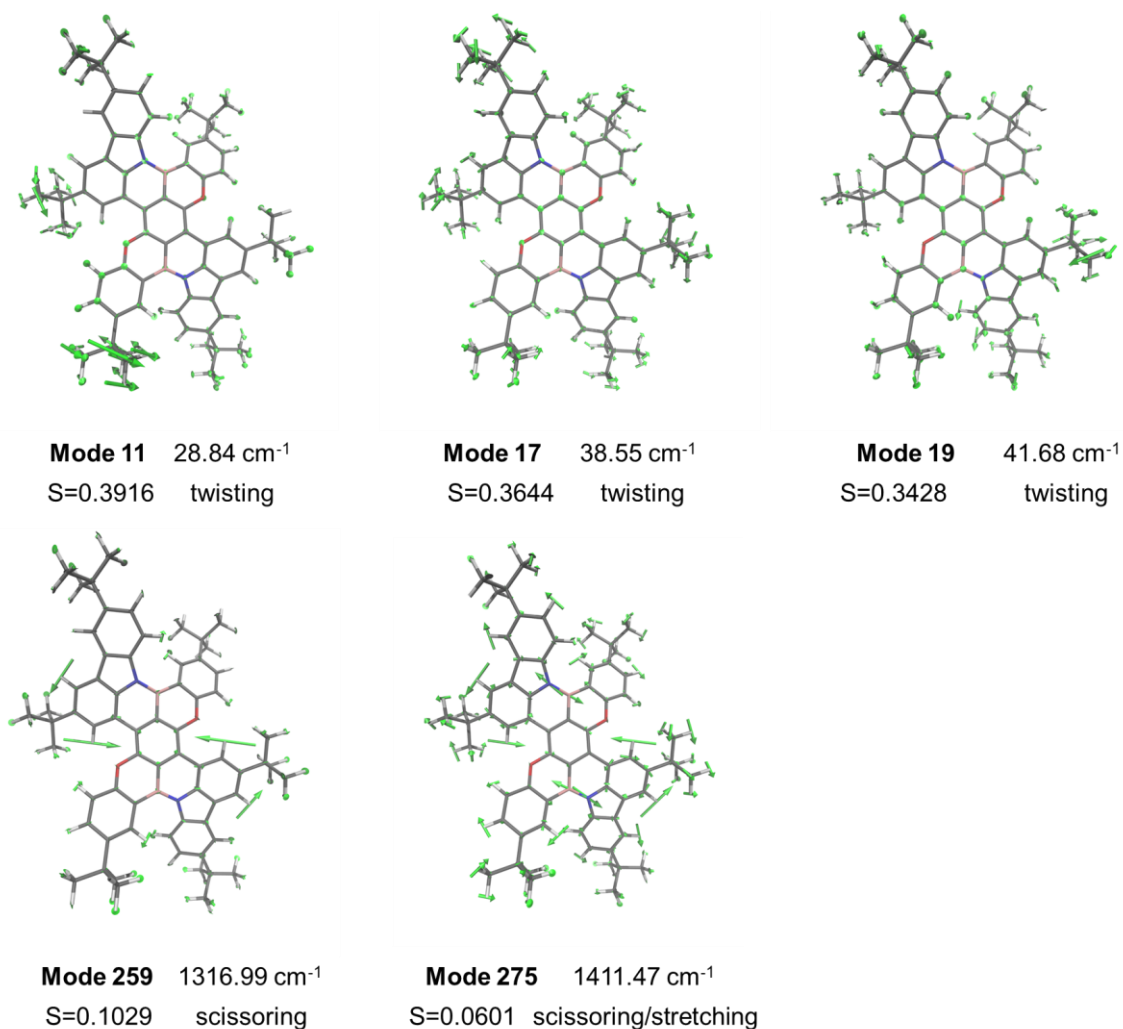

**Figure S7.** Normal vibrational modes in the  $S_0$  state involved in the Franck-Condon spectral progression of **p[B-N]O**.

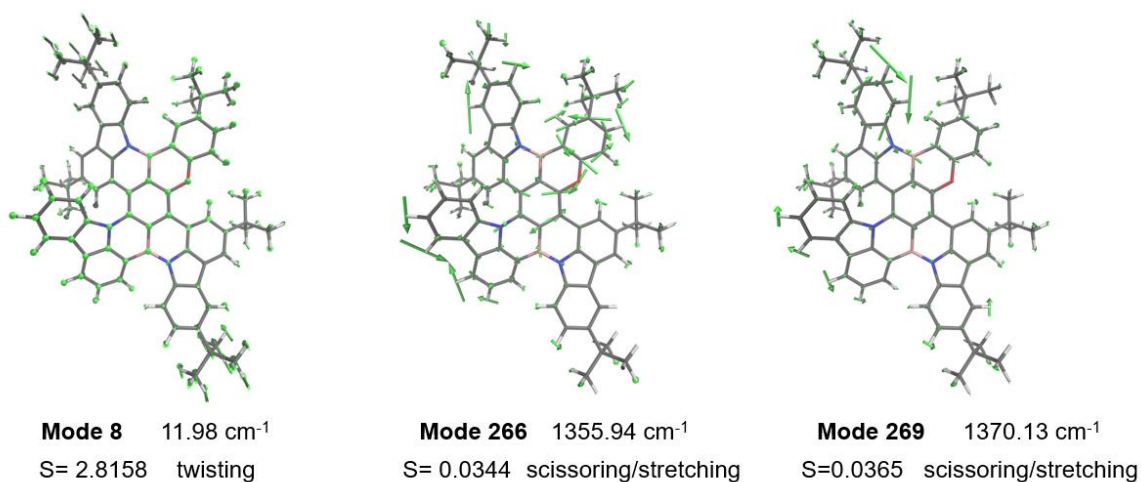

**Figure S8.** Normal vibrational modes in the  $S_0$  state involved in the Franck-Condon spectral progression of p[B-N]NO.

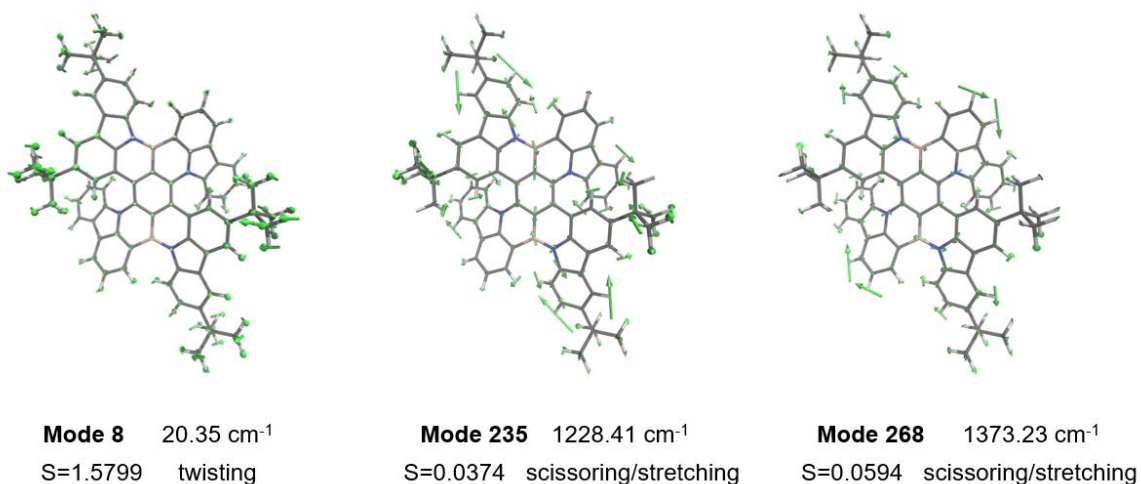

**Figure S9.** Normal vibrational modes in the  $S_0$  state involved in the Franck-Condon spectral progression of p[B-N]N.

**Table S1.** Summary of TD-DFT calculation for [B-N]N, p[B-N]O, p[B-N]NO and p[B-N]N at the  $S_0$  structures based on B3LYP/6-31G(d, p) level.

| Compound | Optimized Structure | Transition            | Wavelength (nm) | Energy (eV) | Oscillator Strength |
|----------|---------------------|-----------------------|-----------------|-------------|---------------------|
| [B-N]N   | $S_0$               | $S_0 \rightarrow S_1$ | 408.13          | 3.0378      | 0.3667              |
|          |                     | $S_0 \rightarrow T_1$ | 482.08          | 2.5718      | 0                   |
| p[B-N]O  | $S_0$               | $S_0 \rightarrow S_1$ | 463.22          | 2.6766      | 0.5573              |
|          |                     | $S_0 \rightarrow T_1$ | 590.82          | 2.0985      | 0                   |
| p[B-N]NO | $S_0$               | $S_0 \rightarrow S_1$ | 489.46          | 2.5331      | 0.4101              |
|          |                     | $S_0 \rightarrow T_1$ | 610.26          | 2.0317      | 0                   |

|         |                |                                |        |        |        |
|---------|----------------|--------------------------------|--------|--------|--------|
| p[B-N]N | S <sub>0</sub> | S <sub>0</sub> →S <sub>1</sub> | 511.32 | 2.4248 | 0.3496 |
|         |                | S <sub>0</sub> →T <sub>1</sub> | 630.72 | 1.9658 | 0      |

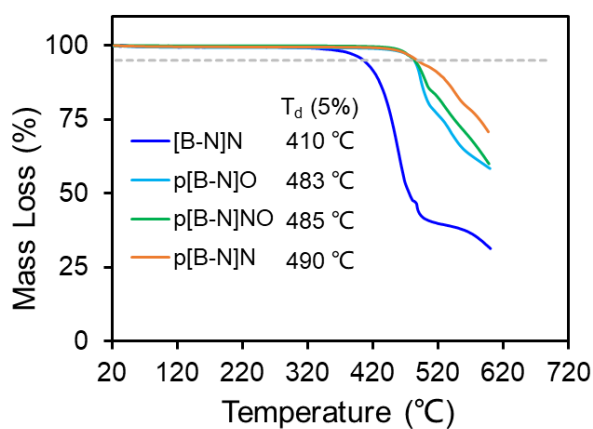

**Figure S10.** Decomposition temperature ( $T_d$ ) with 5% weight loss for [B-N]N, p[B-N]O, p[B-N]NO and p[B-N]N.

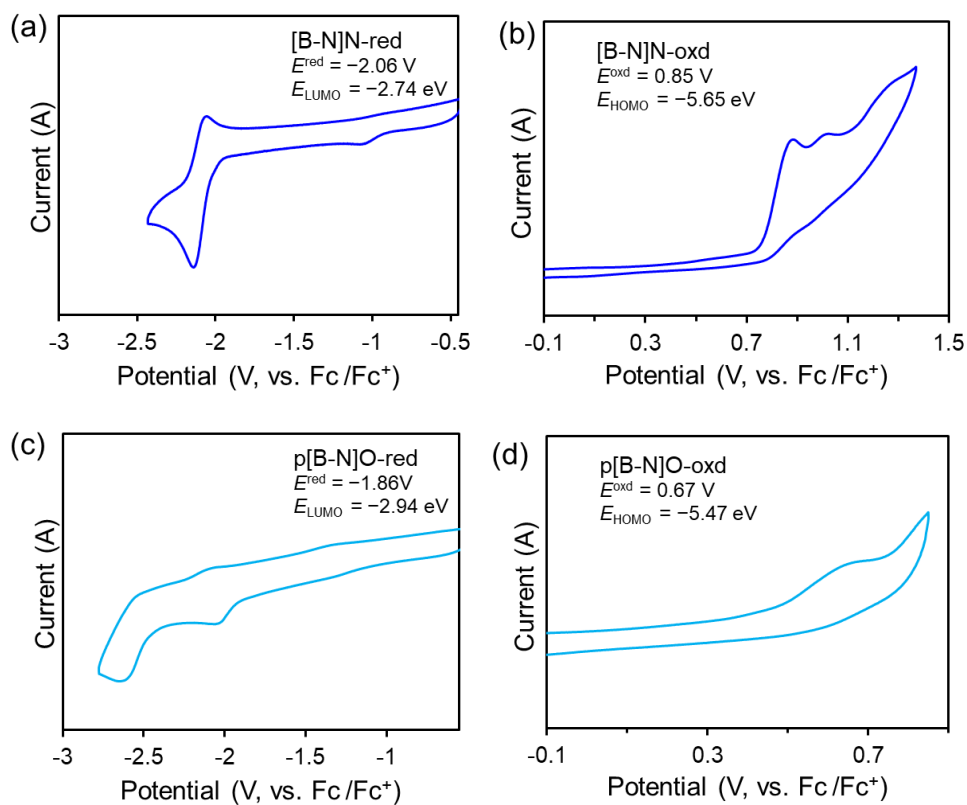

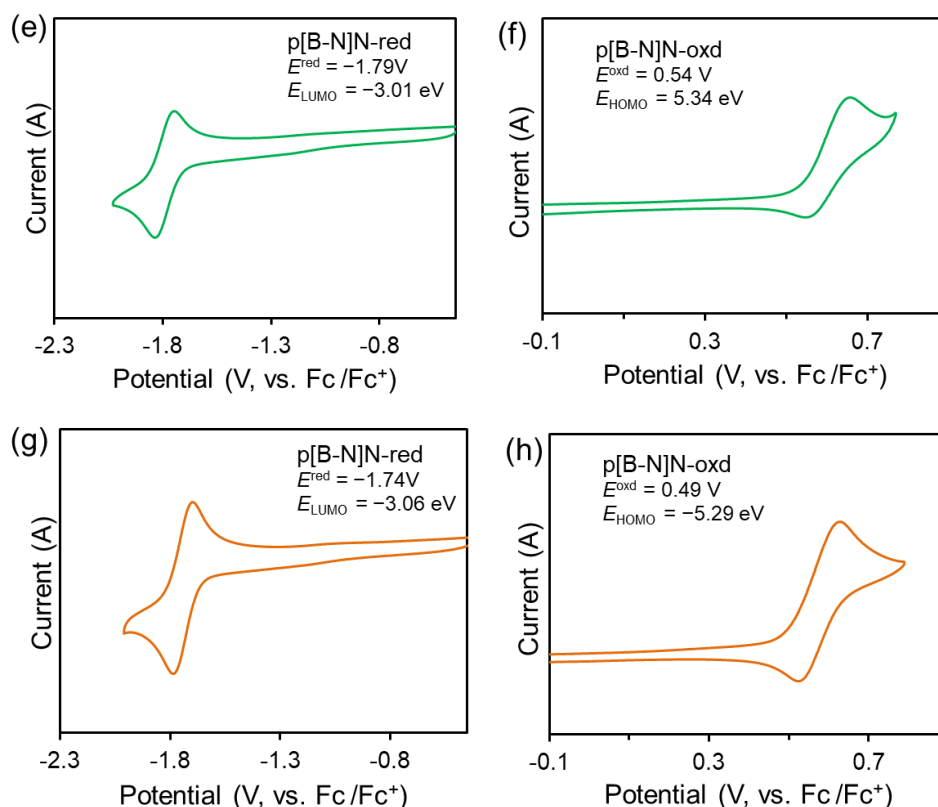

**Figure S11.** Cyclic voltammograms (CV) for [B-N]N, p[B-N]O, p[B-N]NO and p[B-N]N. The CV curves were measured at room temperature with 0.1 M solution of *n*-Bu<sub>4</sub>NPF<sub>6</sub> in dichloromethane for the reduction (a, c, e, g) and oxidation (b, d, f, h) scan (vs Fc/Fc<sup>+</sup>); HOMO and LUMO energies obtained from electrochemical data.

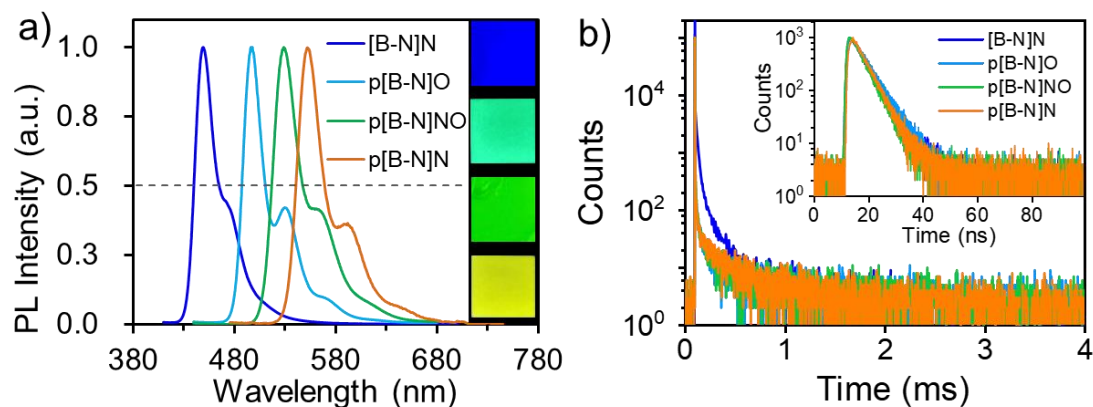

**Figure S12.** (a) The PL spectra and (b) transient PL curves of [B-N]N, p[B-N]O, p[B-N]NO and p[B-N]N doped mCPBC films.



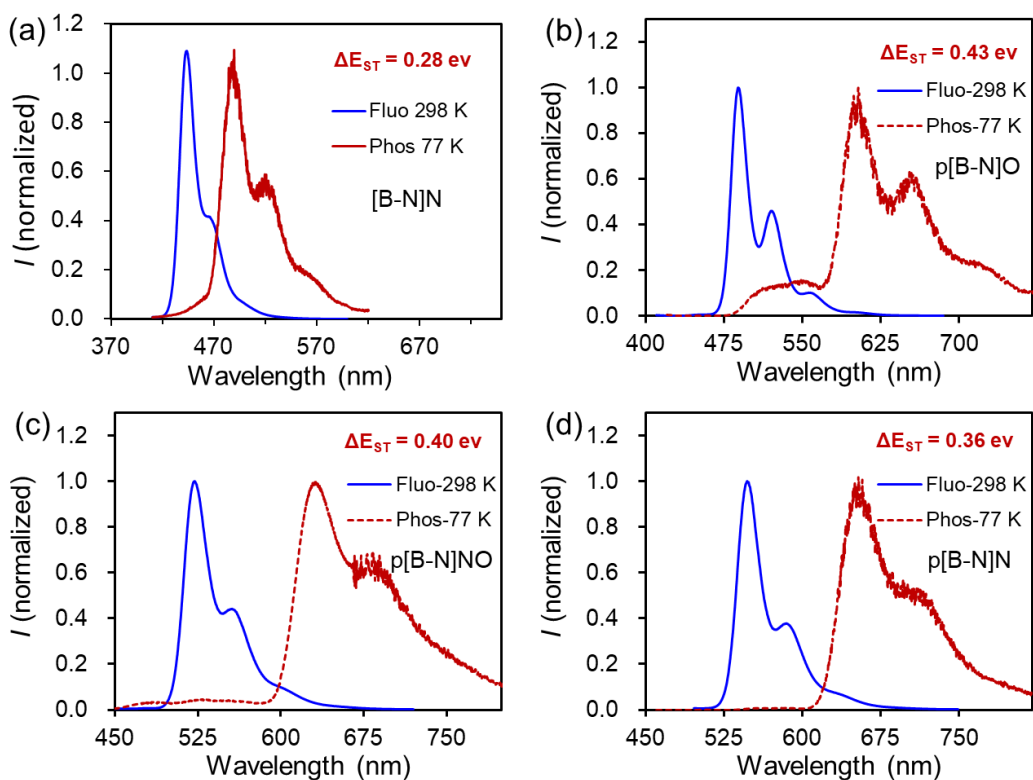

**Figure S13.** The fluorescence and phosphorescence spectra of [B-N]N, p[B-N]O, p[B-N]NO and p[B-N]N in toluene solution. The singlet-triplet energy gaps were estimated from the maximum peak position of fluorescence (298 K) or phosphorescence (77 K).  $\Delta E_{ST} = E_S - E_T$ .

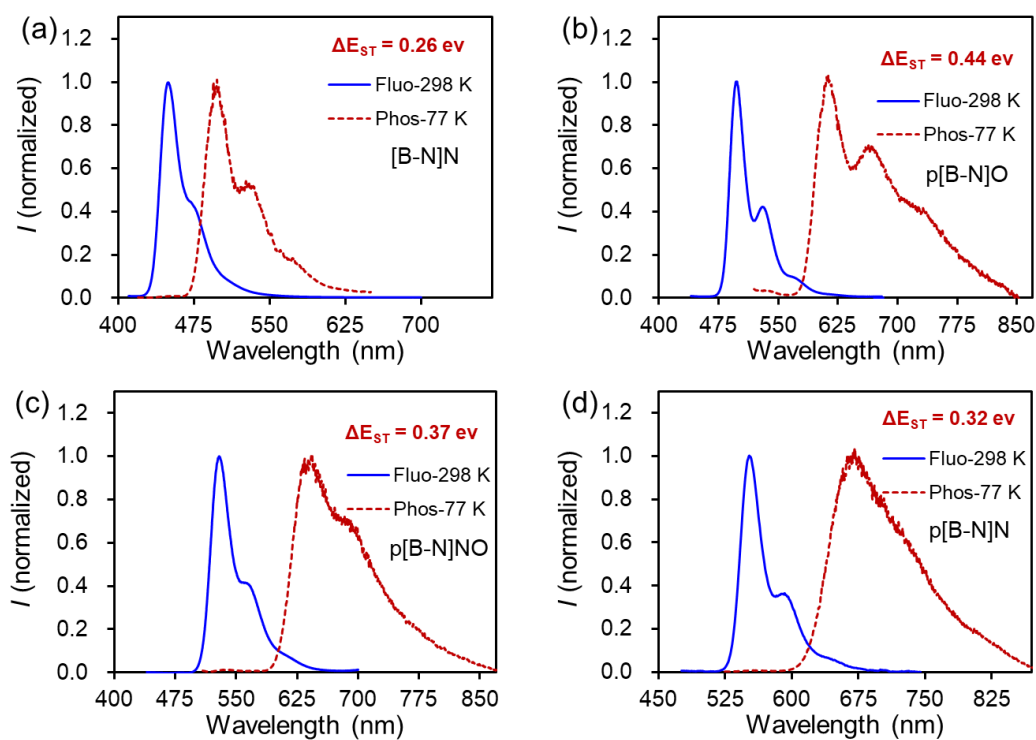

**Figure S14.** The fluorescence and phosphorescence spectra of 1.0 wt% doping concentration of [B-N]N, p[B-N]O, p[B-N]NO and p[B-N]N in mCPBC doped films. The

singlet-triplet energy gaps were estimated from the onsets of fluorescence (298 K) or phosphorescence (77 K).  $\Delta E_{ST}=E_S-E_T$ .

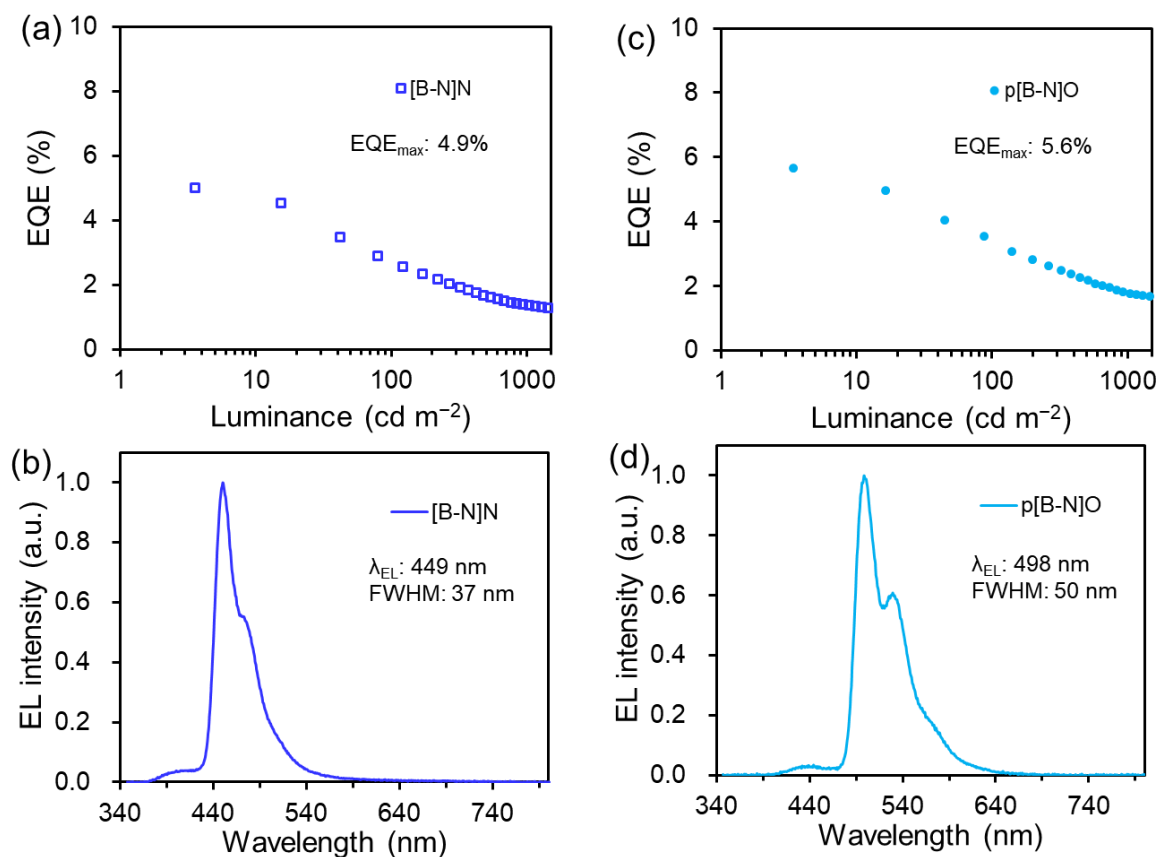

**Figure S15.** (a, c) The EQE versus brightness and (b, d) EL spectra for [B-N]N and p[B-N]O based devices. Based on a device structure of ITO/ NPB (30 nm)/ TCTA (5 nm)/ mCP (5 nm)/ mCPBC: 2 wt% [B-N]N/p[B-N]O (30 nm)/ CzPhPy (15 nm)/ DPPyA (30 nm)/ LiF (0.5 nm)/ Al (150 nm).

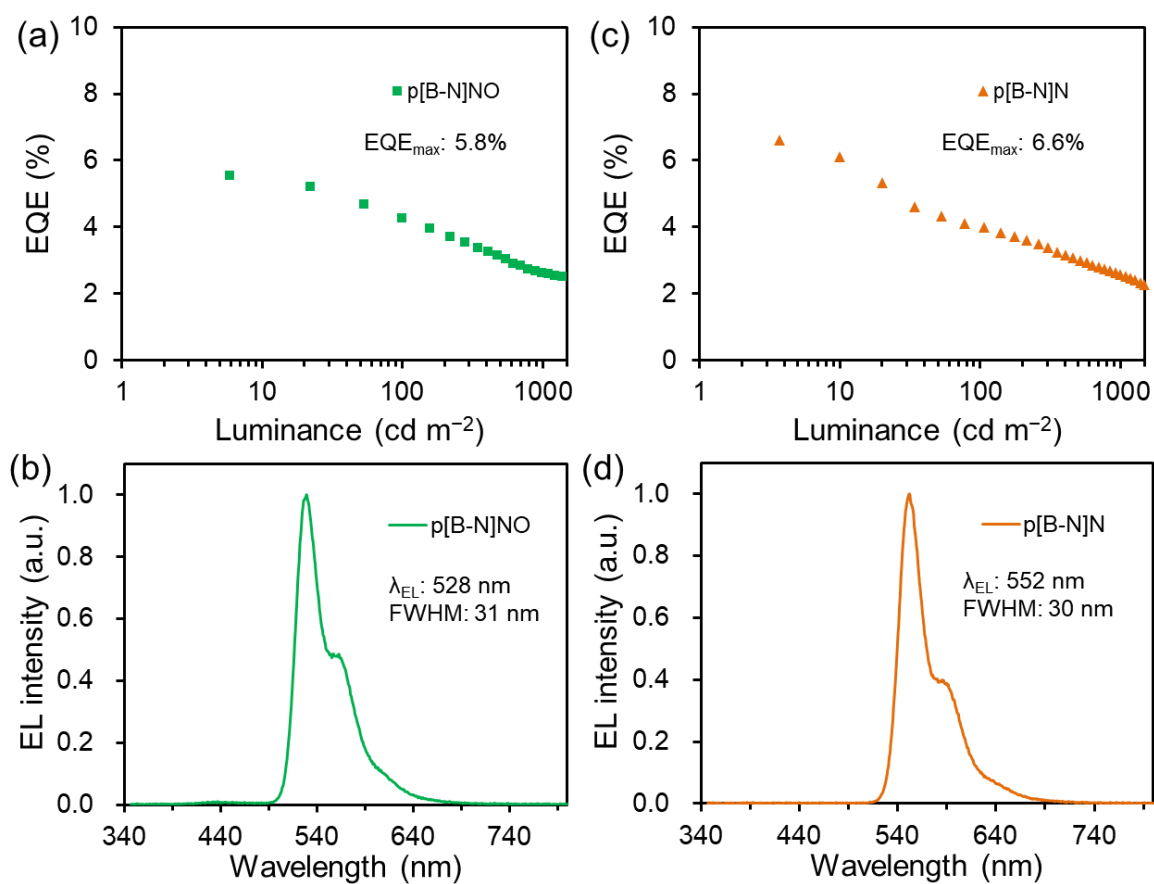

**Figure S16.** (a, c) The EQE versus brightness and (b, d) EL spectra for **p[B-N]NO** and **p[B-N]N** based devices. Based on a device structure of ITO/ NPB (30 nm)/ TCTA (5 nm)/ mCP (5 nm)/ mCPBC: 2 wt% **p[B-N]NO/p[B-N]N** (30 nm)/ CzPhPy (15 nm)/ DPPyA (30 nm)/ LiF (0.5 nm)/ Al (150 nm).

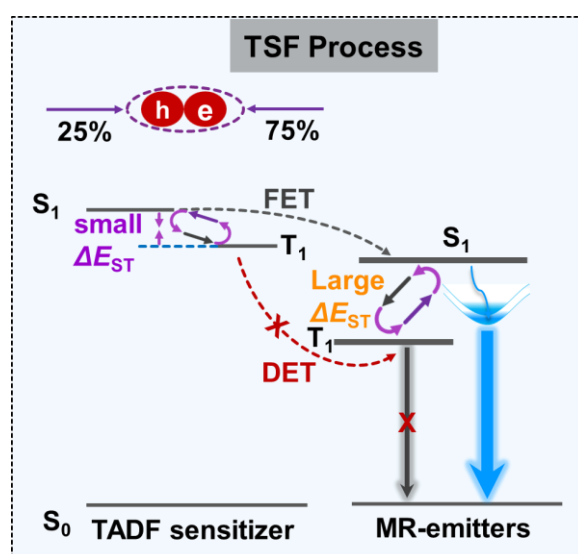

**Figure S17.** The energy transfer process in the TSF devices.

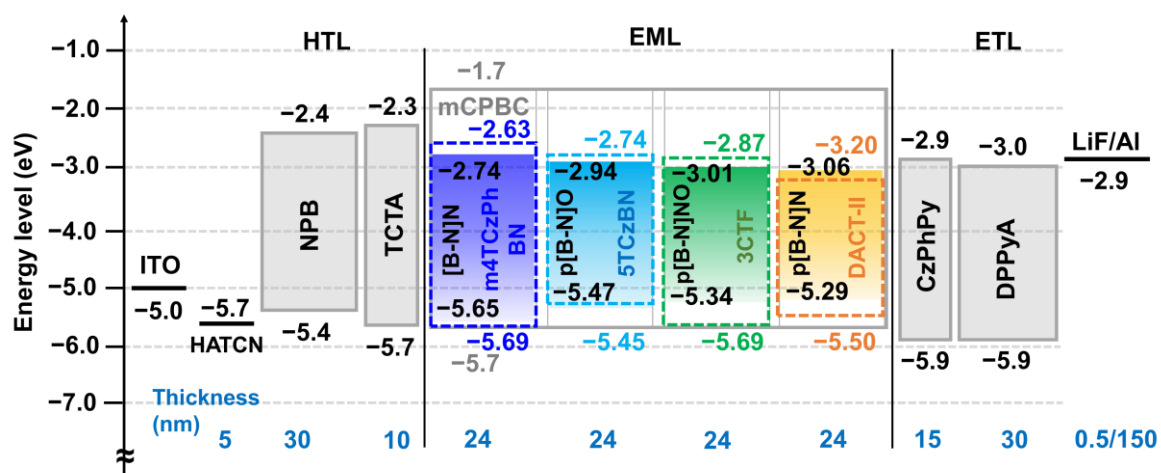

**Figure S18.** The device structure with energy-level diagram based on the derivatives of [B-N]N system.

**Table S2.** The basic material and chemical structures used in the devices.

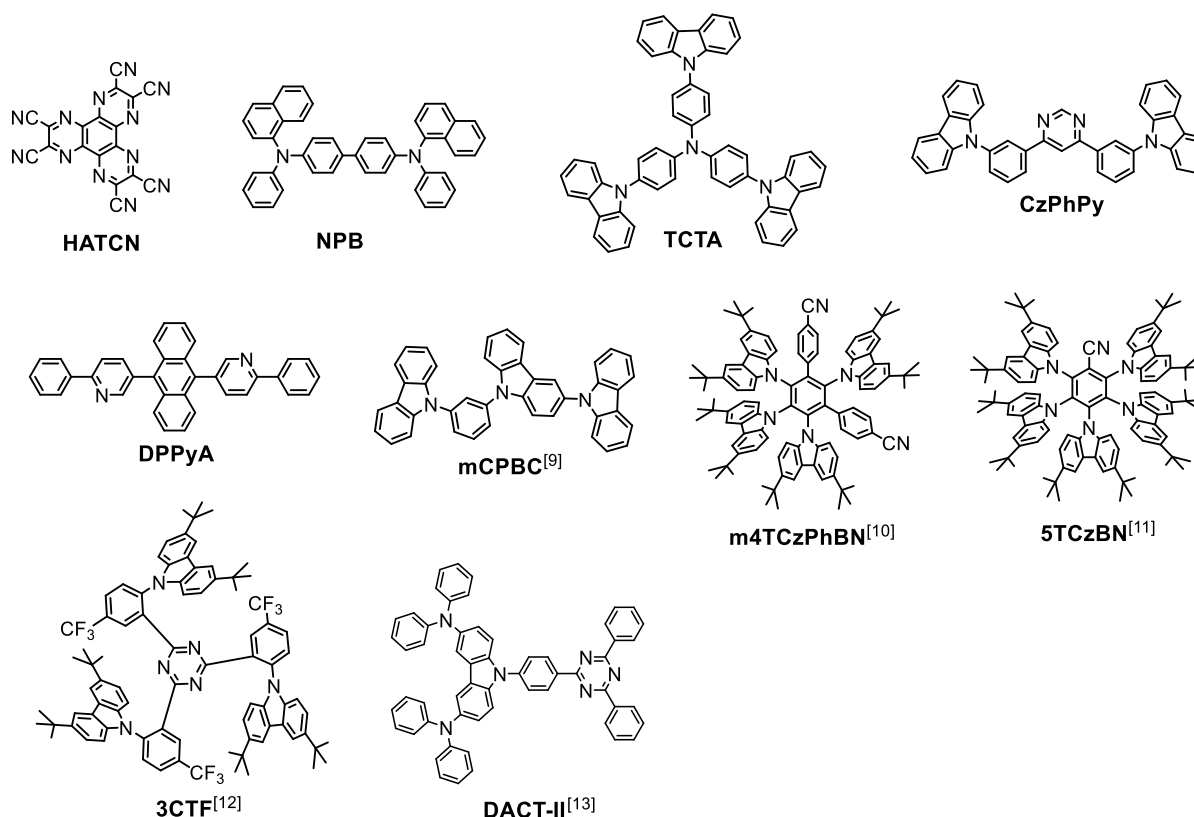

**Table S3.** Photophysical properties of 30 wt% sensitizer and 30 wt% sensitizer: 1 wt% MR emitter doped in mCPBC.

| Compound  | Doped film   | $\lambda_{PL}$ [nm] | FWHM [nm] | $\Phi_{PL}$ [%] | $\tau_{PF}$ [ns] | $\tau_{DF}$ [ $\mu$ s] |
|-----------|--------------|---------------------|-----------|-----------------|------------------|------------------------|
| m4TCzPhBN | 30 wt%       | 442                 | 52        | 80              | 5.0              | 1.70                   |
| [B-N]N    | 30 wt%:1 wt% | 451                 | 26        | 84              | 4.8              | 0.74                   |
| 5TCzBN    | 30 wt%       | 492                 | 82        | 91              | 11.6             | 6.27                   |
| p[B-N]O   | 30 wt%:1 wt% | 497                 | 25        | 95              | 6.9              | 2.94                   |
| 3CTF      | 30 wt%       | 513                 | 87        | 89              | 41.2             | 1.81                   |
| p[B-N]NO  | 30 wt%:1 wt% | 528                 | 31        | 92              | 6.7              | 0.81                   |
| DACT-II   | 30 wt%       | 543                 | 96        | 90              | 8.7              | 0.76                   |
| p[B-N]N   | 30 wt%:1 wt% | 551                 | 29        | 91              | 5.7              | 0.42                   |

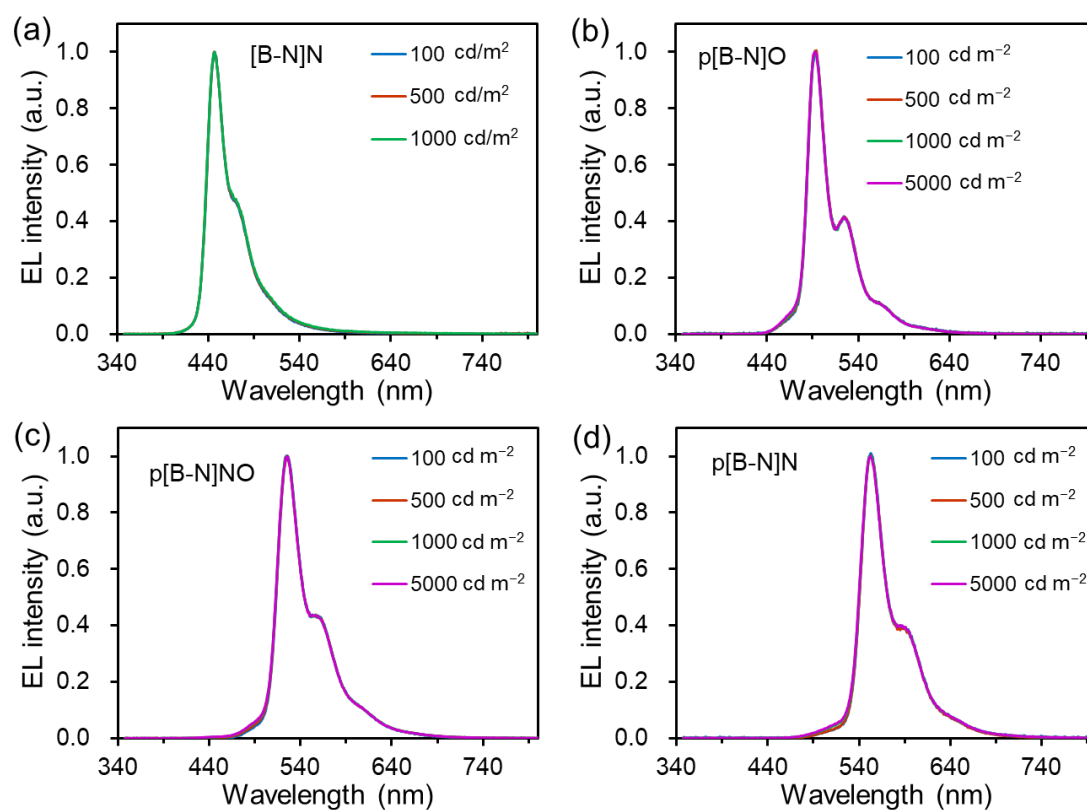

**Figure S19.** The EL spectra of 1.0 wt% doped devices based (a) [B-N]N, (b) p[B-N]O, (c) p[B-N]NO and (d) p[B-N]N under different brightness.

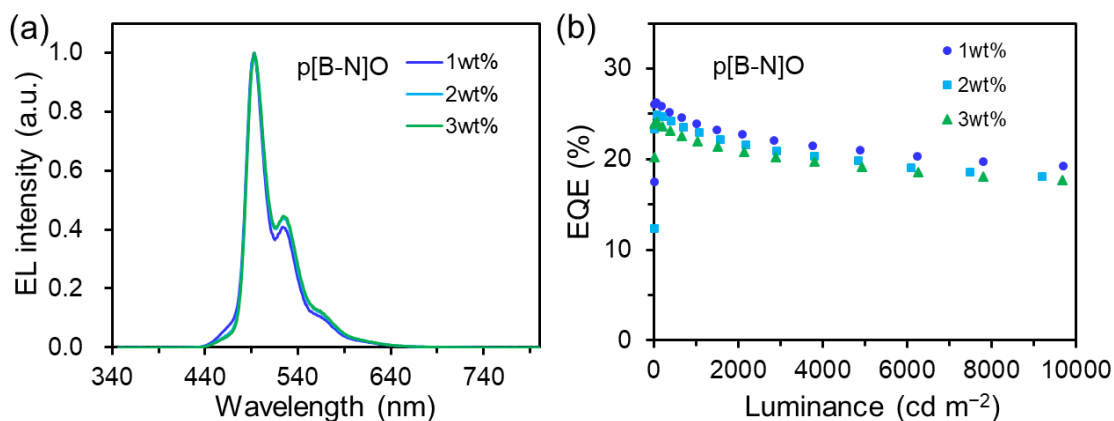

**Figure S20.** (a) The EL spectra and (b) EQE versus brightness characters for devices based on **p[B-N]O**. The devices based on a structure of ITO/ HATCN (5 nm)/ NPB (30 nm)/ TCTA (5 nm)/ mCPBC: 30.0% 5TCzBN: 1.0-3.0 wt% **p[B-N]O** (24 nm)/ CzPhPy (10 nm)/ DPPyA(30 nm)/ LiF (0.5 nm)/ Al (150 nm).

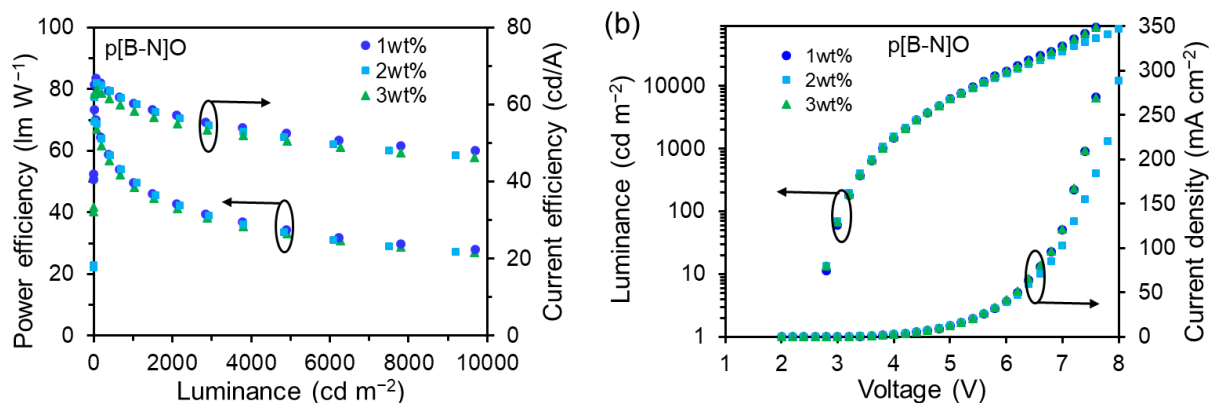

**Figure S21.** (a) The power efficiency and current efficiency versus brightness characters and (b) luminance-voltage-current density characters for devices based on **p[B-N]O**.

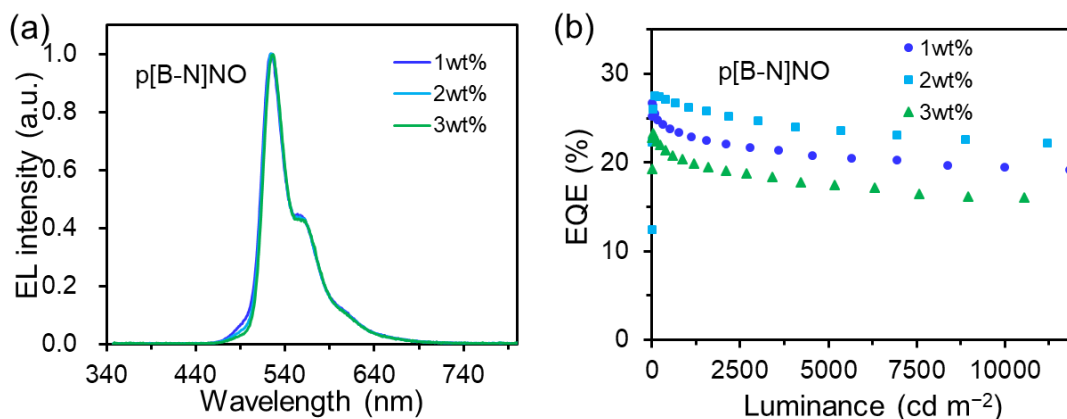

**Figure S22.** (a, c) The EL spectra and (b, d) EQE versus brightness characters for devices based on **p[B-N]NO**. The devices based on a structure of ITO/ HATCN (5 nm)/ NPB (30 nm)/ TCTA (5 nm)/ mCPBC: 30.0% 3CTF: 1.0-3.0 wt% **p[B-N]NO** (24 nm)/ CzPhPy (10 nm)/ DPPyA(30 nm)/ LiF (0.5 nm)/ Al (150 nm).

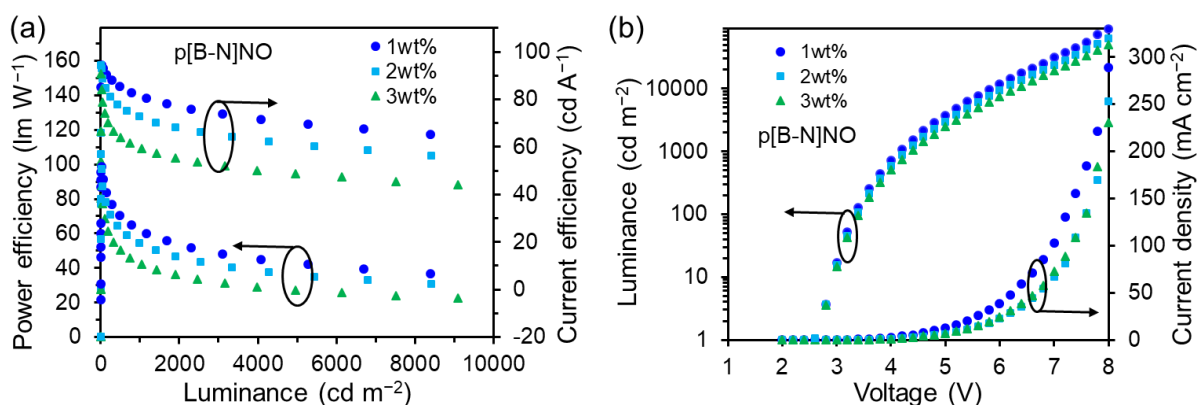

**Figure S23.** (a) The power efficiency and current efficiency versus brightness characters and (b) luminance-voltage-current density characters for devices based on **p[B-N]NO**.

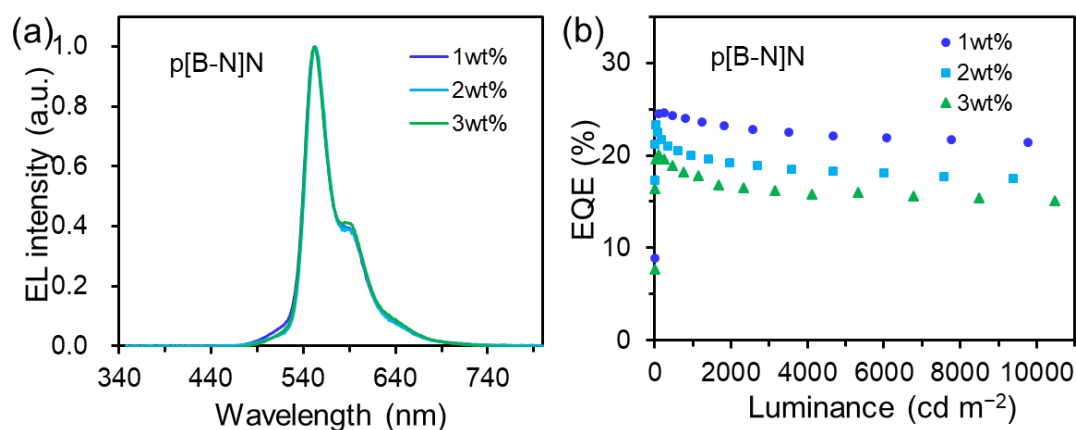

**Figure S24.** (a) The EL spectra and (b) EQE versus brightness characters for devices based on **p[B-N]N**. The devices based on a structure of ITO/ HATCN (5 nm)/ NPB (30 nm)/ TCTA (5 nm)/ mCPBC: 30.0% DACT-II: 1.0-3.0 wt% **p[B-N]N** (24 nm)/ CzPhPy (10 nm)/ DPPyA(30 nm)/ LiF (0.5 nm)/ Al (150 nm).

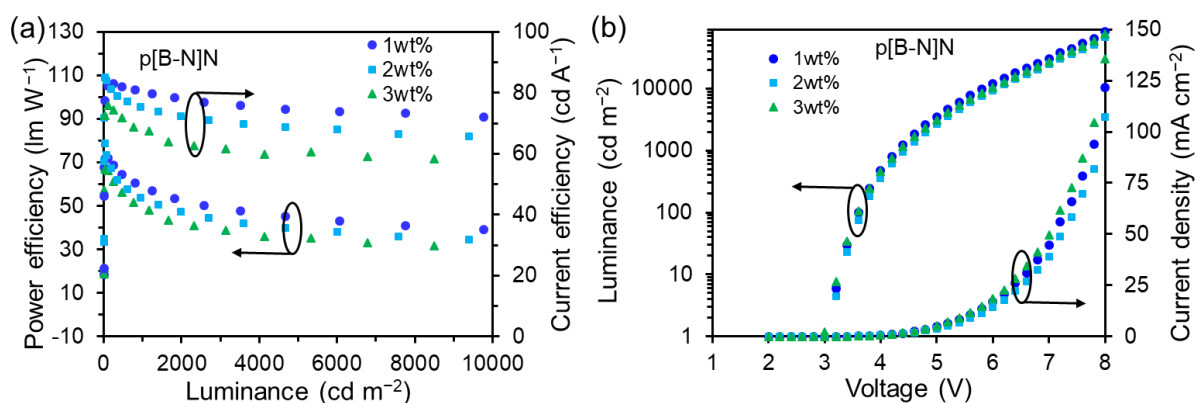

**Figure S25.** (a) The power efficiency and current efficiency versus brightness characters and (b) luminance-voltage-current density characters for devices based on **p[B-N]N**.

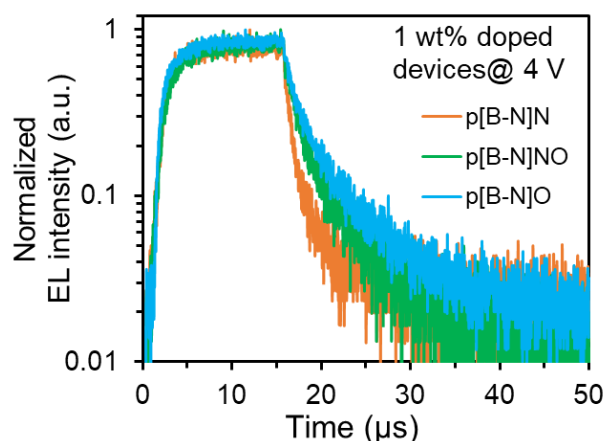

**Figure S26.** EL transient spectra of devices based on **p[B-N]O**, **p[B-N]NO** and **p[B-N]N** under the voltage of 4 V.

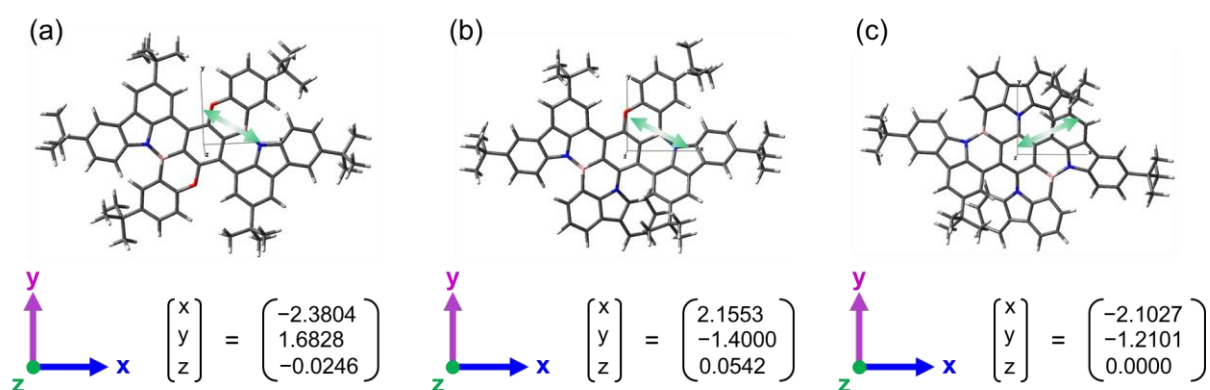

**Figure S27.** The optimized  $S_0$  state geometry of (a) **p[B-N]O**, (b) **p[B-N]NO** and (c) **p[B-N]N**, and the direction of their transition dipole moments.

**Table S4.** Summary of the device performances of the OLEDs based on **p[B-N]O**, **p[B-N]NO** and **p[B-N]N**.

| Compounds       | x wt% | $\lambda_{EL}^a$ [nm] | FWHM <sup>b)</sup> [nm] | $V_{on}^c$ [V] | $L_{max}^d$ [cd m <sup>-2</sup> ] | CE <sup>e)</sup> [cd A <sup>-1</sup> ] | PE <sup>f)</sup> [lm W <sup>-1</sup> ] | EQE <sup>g)</sup> [%] | CIE (x,y) <sup>a)</sup> |
|-----------------|-------|-----------------------|-------------------------|----------------|-----------------------------------|----------------------------------------|----------------------------------------|-----------------------|-------------------------|
| <b>p[B-N]O</b>  | 1.0   | 493                   | 24.6                    | 2.6            | 112000                            | 66.8/60.2/52.6                         | 73.2/49.8/34.4                         | 26.3/24.0/21.0        | (0.163, 0.514)          |
|                 | 2.0   | 493                   | 24.8                    | 2.6            | 108000                            | 65.7/60.1/51.4                         | 69.5/49.7/33.7                         | 24.9/22.9/19.8        | (0.172, 0.537)          |
|                 | 3.0   | 493                   | 25.2                    | 2.6            | 116000                            | 64.1/58.2/50.5                         | 70.5/48.1/33.0                         | 24.1/22.0/19.2        | (0.174, 0.544)          |
| <b>p[B-N]NO</b> | 1.0   | 524                   | 31.6                    | 2.6            | 91000                             | 99.9/87.8/79.2                         | 110.7/65.7/47.9                        | 26.7/22.9/20.7        | (0.303, 0.645)          |
|                 | 2.0   | 525                   | 31.2                    | 2.6            | 106000                            | 102.0/96.6/85.8                        | 101.0/75.9/53.9                        | 27.6/26.3/23.6        | (0.306, 0.648)          |
|                 | 3.0   | 526                   | 30.8                    | 2.6            | 111000                            | 90.2/77.5/67.7                         | 97.1/55.3/38.0                         | 23.3/19.9/17.5        | (0.309, 0.651)          |
| <b>p[B-N]N</b>  | 1.0   | 552                   | 31.3                    | 3.1            | 127000                            | 83.0/79.6/74.7                         | 71.9/56.9/45.1                         | 24.6/23.6/22.1        | (0.414, 0.571)          |
|                 | 2.0   | 553                   | 31.2                    | 3.1            | 104000                            | 85.2/73.9/68.8                         | 78.7/50.4/40.0                         | 23.3/19.6/18.3        | (0.422, 0.567)          |
|                 | 3.0   | 553                   | 31.1                    | 3.0            | 116000                            | 76.0/67.4/60.7                         | 67.1/48.2/35.3                         | 20.1/17.8/16.0        | (0.423, 0.567)          |

[a] Value recorded at a luminance around 1,000 cd cm<sup>-2</sup>; [b] Full width at half maximum of EL given in



wavelength; [c] Turn-on voltage at the luminance of  $1 \text{ cd m}^{-2}$ ; [d] Maximum luminescence (L); [e] Maximum CE, value at 1,000 and 5,000  $\text{cd cm}^{-2}$ ; [f] Maximum PE, value at 1,000 and 5,000  $\text{cd cm}^{-2}$ ; [g] Maximum EQE, value at 1,000 and 5,000  $\text{cd cm}^{-2}$ .

**Table S5.** All vibration modes in the  $S_0$  state involved in the Franck-Condon spectral progression of **p[B-N]O**, **p[B-N]NO** and **p[B-N]N** at the (TD)B3LYP/6-31G(d,p) level.

| Compound | p[B-N]O        |                               |       | p[B-N]NO                       |                |                               |       |                                |
|----------|----------------|-------------------------------|-------|--------------------------------|----------------|-------------------------------|-------|--------------------------------|
|          | vibration mode | $\omega$ ( $\text{cm}^{-1}$ ) | S     | $\lambda$ ( $\text{cm}^{-1}$ ) | vibration mode | $\omega$ ( $\text{cm}^{-1}$ ) | S     | $\lambda$ ( $\text{cm}^{-1}$ ) |
| 1        | 0              | 0                             | 0     | 1                              | 0              | 0                             | 0     | 0                              |
| 2        | 0              | 0                             | 0     | 2                              | 0              | 0                             | 0     | 0                              |
| 3        | 0              | 0                             | 0     | 3                              | 0              | 0                             | 0     | 0                              |
| 4        | 0              | 0                             | 0     | 4                              | 0              | 0                             | 0     | 0                              |
| 5        | 0              | 0                             | 0     | 5                              | 0              | 0                             | 0     | 0                              |
| 6        | 0              | 0                             | 0     | 6                              | 0              | 0                             | 0     | 0                              |
| 7        | 6.52           | 0.00489                       | 0.03  | 7                              | 11.75          | 0.08741                       | 1.03  |                                |
| 8        | 11.61          | 0.00192                       | 0.02  | 8                              | 11.98          | 2.81582                       | 33.73 |                                |
| 9        | 19.66          | 0.03567                       | 0.7   | 9                              | 23.27          | 0.3321                        | 7.73  |                                |
| 10       | 25.38          | 0.00187                       | 0.05  | 10                             | 25.03          | 0.08631                       | 2.16  |                                |
| 11       | 28.84          | 0.39156                       | 11.29 | 11                             | 27.66          | 0.00002                       | 0     |                                |
| 12       | 29.76          | 0.10842                       | 3.23  | 12                             | 30.91          | 0.0399                        | 1.23  |                                |
| 13       | 30.55          | 0                             | 0     | 13                             | 33.06          | 0.00242                       | 0.08  |                                |
| 14       | 31.28          | 0.00648                       | 0.2   | 14                             | 36.41          | 0.12541                       | 4.57  |                                |
| 15       | 34.94          | 0.00038                       | 0.01  | 15                             | 39.93          | 0.00207                       | 0.08  |                                |
| 16       | 35.16          | 0.08805                       | 3.1   | 16                             | 41.95          | 0.01412                       | 0.59  |                                |
| 17       | 38.55          | 0.36441                       | 14.05 | 17                             | 42.35          | 0.00576                       | 0.24  |                                |
| 18       | 39.32          | 0.0763                        | 3     | 18                             | 45.58          | 0.1091                        | 4.97  |                                |
| 19       | 41.68          | 0.34281                       | 14.29 | 19                             | 57.27          | 0.09486                       | 5.43  |                                |
| 20       | 51.59          | 0.01014                       | 0.52  | 20                             | 64.1           | 0.01053                       | 0.67  |                                |
| 21       | 61.49          | 0.1885                        | 11.59 | 21                             | 69.06          | 0.00299                       | 0.21  |                                |
| 22       | 65.95          | 0.00177                       | 0.12  | 22                             | 74.44          | 0.00011                       | 0.01  |                                |
| 23       | 76.58          | 0.00762                       | 0.58  | 23                             | 77.91          | 0.04657                       | 3.63  |                                |
| 24       | 79.55          | 0.0243                        | 1.93  | 24                             | 87.78          | 0.13164                       | 11.56 |                                |
| 25       | 83.02          | 0.03857                       | 3.2   | 25                             | 90.78          | 0.01113                       | 1.01  |                                |
| 26       | 87.51          | 0.01444                       | 1.26  | 26                             | 93.28          | 0.00802                       | 0.75  |                                |
| 27       | 93.78          | 0                             | 0     | 27                             | 106.37         | 0                             | 0     |                                |
| 28       | 100.95         | 0.07831                       | 7.91  | 28                             | 112.28         | 0.00647                       | 0.73  |                                |
| 29       | 112.61         | 0.06421                       | 7.23  | 29                             | 120.89         | 0.01125                       | 1.36  |                                |
| 30       | 124.73         | 0.04051                       | 5.05  | 30                             | 124.52         | 0.02898                       | 3.61  |                                |
| 31       | 129.15         | 0.0022                        | 0.28  | 31                             | 142            | 0.01284                       | 1.82  |                                |
| 32       | 139.85         | 0.0009                        | 0.13  | 32                             | 143.2          | 0.00545                       | 0.78  |                                |

|    |        |         |       |    |        |         |       |
|----|--------|---------|-------|----|--------|---------|-------|
| 33 | 148.05 | 0.00703 | 1.04  | 33 | 148.44 | 0.00796 | 1.18  |
| 34 | 151.25 | 0.07209 | 10.9  | 34 | 153.31 | 0.00325 | 0.5   |
| 35 | 154.25 | 0.00161 | 0.25  | 35 | 159.47 | 0.00325 | 0.52  |
| 36 | 161.16 | 0.00012 | 0.02  | 36 | 162.63 | 0.00457 | 0.74  |
| 37 | 164.42 | 0.00054 | 0.09  | 37 | 168.15 | 0.01209 | 2.03  |
| 38 | 174.65 | 0.0057  | 1     | 38 | 190.86 | 0.00075 | 0.14  |
| 39 | 184.49 | 0.00069 | 0.13  | 39 | 195.54 | 0.01152 | 2.25  |
| 40 | 192.93 | 0.00039 | 0.08  | 40 | 198.87 | 0.00088 | 0.18  |
| 41 | 199.77 | 0.00014 | 0.03  | 41 | 211.48 | 0.00109 | 0.23  |
| 42 | 206.96 | 0.01993 | 4.12  | 42 | 220.12 | 0.00961 | 2.12  |
| 43 | 212.12 | 0.00054 | 0.12  | 43 | 224.14 | 0.01399 | 3.14  |
| 44 | 217.1  | 0.00001 | 0     | 44 | 225.72 | 0.01183 | 2.67  |
| 45 | 228.25 | 0.00307 | 0.7   | 45 | 232.98 | 0.0066  | 1.54  |
| 46 | 232.5  | 0.00255 | 0.59  | 46 | 235.35 | 0.00156 | 0.37  |
| 47 | 234.2  | 0.00013 | 0.03  | 47 | 236.67 | 0.0009  | 0.21  |
| 48 | 235.78 | 0.00053 | 0.13  | 48 | 237.65 | 0.00063 | 0.15  |
| 49 | 237.01 | 0.00004 | 0.01  | 49 | 238.57 | 0.00062 | 0.15  |
| 50 | 238.02 | 0.00082 | 0.2   | 50 | 245.45 | 0.02078 | 5.1   |
| 51 | 241.92 | 0.00521 | 1.26  | 51 | 250.02 | 0.00697 | 1.74  |
| 52 | 250.82 | 0.0106  | 2.66  | 52 | 258.27 | 0.00051 | 0.13  |
| 53 | 253.39 | 0.00033 | 0.08  | 53 | 264.08 | 0.00036 | 0.09  |
| 54 | 260.38 | 0.00125 | 0.33  | 54 | 270.67 | 0       | 0     |
| 55 | 263.6  | 0.00997 | 2.63  | 55 | 274.6  | 0       | 0     |
| 56 | 268.45 | 0       | 0     | 56 | 276.53 | 0.00405 | 1.12  |
| 57 | 272.31 | 0.01032 | 2.81  | 57 | 279.83 | 0.00352 | 0.98  |
| 58 | 273.42 | 0.00313 | 0.86  | 58 | 280.63 | 0.03226 | 9.05  |
| 59 | 275.69 | 0.00007 | 0.02  | 59 | 284.38 | 0.00939 | 2.67  |
| 60 | 278.1  | 0.00005 | 0.01  | 60 | 288.36 | 0.00204 | 0.59  |
| 61 | 281.36 | 0.00086 | 0.24  | 61 | 289.68 | 0.0434  | 12.57 |
| 62 | 284.64 | 0.01295 | 3.69  | 62 | 301.81 | 0.00359 | 1.08  |
| 63 | 287.51 | 0.00879 | 2.53  | 63 | 304.57 | 0.02202 | 6.71  |
| 64 | 290.84 | 0.01089 | 3.17  | 64 | 307.35 | 0.01479 | 4.55  |
| 65 | 298.25 | 0.00048 | 0.14  | 65 | 311.93 | 0.01234 | 3.85  |
| 66 | 300.47 | 0.0003  | 0.09  | 66 | 317.47 | 0.00162 | 0.52  |
| 67 | 308.79 | 0.00001 | 0     | 67 | 318.21 | 0.0121  | 3.85  |
| 68 | 312.4  | 0.01774 | 5.54  | 68 | 321.11 | 0.00046 | 0.15  |
| 69 | 315.4  | 0.01669 | 5.26  | 69 | 326.87 | 0.02114 | 6.91  |
| 70 | 324.54 | 0.03774 | 12.25 | 70 | 329.32 | 0.00718 | 2.36  |
| 71 | 325.71 | 0.00081 | 0.26  | 71 | 332.6  | 0.00012 | 0.04  |
| 72 | 328.21 | 0.01494 | 4.9   | 72 | 333.82 | 0.00028 | 0.09  |
| 73 | 330.66 | 0.00479 | 1.58  | 73 | 334.3  | 0.00036 | 0.12  |
| 74 | 331.95 | 0.00008 | 0.03  | 74 | 334.89 | 0.00011 | 0.04  |
| 75 | 332.81 | 0.00045 | 0.15  | 75 | 339.33 | 0.01439 | 4.88  |

|     |        |         |       |     |        |         |       |
|-----|--------|---------|-------|-----|--------|---------|-------|
| 76  | 335.02 | 0.0005  | 0.17  | 76  | 342.04 | 0.0097  | 3.32  |
| 77  | 335.37 | 0.00297 | 0.99  | 77  | 349.49 | 0.00001 | 0     |
| 78  | 336.34 | 0.00074 | 0.25  | 78  | 354.08 | 0.00012 | 0.04  |
| 79  | 340.92 | 0.00789 | 2.69  | 79  | 358.28 | 0.00024 | 0.08  |
| 80  | 347.07 | 0.02313 | 8.03  | 80  | 361.64 | 0.00071 | 0.26  |
| 81  | 355.07 | 0.01494 | 5.3   | 81  | 365.71 | 0.00011 | 0.04  |
| 82  | 355.69 | 0.003   | 1.07  | 82  | 368.52 | 0.00075 | 0.28  |
| 83  | 363.43 | 0.00016 | 0.06  | 83  | 371.73 | 0.02556 | 9.5   |
| 84  | 365.51 | 0.00097 | 0.35  | 84  | 377.33 | 0.0004  | 0.15  |
| 85  | 366.53 | 0.00001 | 0.01  | 85  | 380.14 | 0.00523 | 1.99  |
| 86  | 369.83 | 0.0391  | 14.46 | 86  | 383.21 | 0.00765 | 2.93  |
| 87  | 373.12 | 0.00083 | 0.31  | 87  | 389.08 | 0.00005 | 0.02  |
| 88  | 376.38 | 0.0062  | 2.33  | 88  | 422.5  | 0.00885 | 3.74  |
| 89  | 381.43 | 0.00004 | 0.01  | 89  | 428.64 | 0.00661 | 2.83  |
| 90  | 382.92 | 0.01057 | 4.05  | 90  | 430.49 | 0.00634 | 2.73  |
| 91  | 383.25 | 0.00155 | 0.59  | 91  | 435.08 | 0.00626 | 2.72  |
| 92  | 391.43 | 0.01129 | 4.42  | 92  | 443.28 | 0.00001 | 0     |
| 93  | 424.01 | 0.00038 | 0.16  | 93  | 445.61 | 0.00311 | 1.39  |
| 94  | 428.07 | 0.00038 | 0.16  | 94  | 448.86 | 0.00196 | 0.88  |
| 95  | 429.73 | 0.01249 | 5.37  | 95  | 452.33 | 0.00172 | 0.78  |
| 96  | 431.41 | 0.00019 | 0.08  | 96  | 453.15 | 0.02019 | 9.15  |
| 97  | 440.31 | 0       | 0     | 97  | 458.77 | 0.00001 | 0.01  |
| 98  | 444.57 | 0.00001 | 0     | 98  | 463.05 | 0.02297 | 10.64 |
| 99  | 447.66 | 0.00495 | 2.22  | 99  | 466.5  | 0.00081 | 0.38  |
| 100 | 451.96 | 0.00035 | 0.16  | 100 | 470.6  | 0.00023 | 0.11  |
| 101 | 452.38 | 0.00003 | 0.01  | 101 | 474.96 | 0.00026 | 0.12  |
| 102 | 453.04 | 0.00173 | 0.78  | 102 | 478.04 | 0.00009 | 0.04  |
| 103 | 460.16 | 0.00692 | 3.18  | 103 | 478.91 | 0.00191 | 0.91  |
| 104 | 465.94 | 0.00016 | 0.08  | 104 | 489.78 | 0.0142  | 6.95  |
| 105 | 472.15 | 0.00412 | 1.95  | 105 | 498.87 | 0.00065 | 0.32  |
| 106 | 472.91 | 0.00003 | 0.01  | 106 | 503.16 | 0.00048 | 0.24  |
| 107 | 478.57 | 0.00048 | 0.23  | 107 | 507.23 | 0.00109 | 0.55  |
| 108 | 479.09 | 0.00004 | 0.02  | 108 | 515.52 | 0.00773 | 3.98  |
| 109 | 485.02 | 0.00036 | 0.18  | 109 | 516.99 | 0.00029 | 0.15  |
| 110 | 493.09 | 0.00002 | 0.01  | 110 | 526.67 | 0.00025 | 0.13  |
| 111 | 501.32 | 0.00012 | 0.06  | 111 | 539.2  | 0.00894 | 4.82  |
| 112 | 507.37 | 0.0001  | 0.05  | 112 | 548.17 | 0.00111 | 0.61  |
| 113 | 509.75 | 0.00001 | 0     | 113 | 555.96 | 0.00134 | 0.74  |
| 114 | 517.02 | 0.00002 | 0.01  | 114 | 568.33 | 0.00191 | 1.09  |
| 115 | 517.94 | 0.00226 | 1.17  | 115 | 575.28 | 0.00046 | 0.26  |
| 116 | 531.52 | 0.00286 | 1.52  | 116 | 579.8  | 0.00091 | 0.53  |
| 117 | 540.99 | 0.00001 | 0     | 117 | 585.6  | 0.00237 | 1.39  |
| 118 | 562.47 | 0.00023 | 0.13  | 118 | 589.72 | 0.00036 | 0.21  |

|     |        |         |      |     |        |         |      |
|-----|--------|---------|------|-----|--------|---------|------|
| 119 | 565.64 | 0.01596 | 9.03 | 119 | 600.53 | 0.00227 | 1.36 |
| 120 | 572.66 | 0       | 0    | 120 | 601.21 | 0.00583 | 3.5  |
| 121 | 578.93 | 0       | 0    | 121 | 615.1  | 0.00248 | 1.52 |
| 122 | 585.03 | 0.00235 | 1.38 | 122 | 626.33 | 0.00005 | 0.03 |
| 123 | 599.52 | 0       | 0    | 123 | 631.54 | 0.0032  | 2.02 |
| 124 | 604.29 | 0.00602 | 3.64 | 124 | 642.95 | 0.00018 | 0.11 |
| 125 | 617.82 | 0       | 0    | 125 | 645.02 | 0.00048 | 0.31 |
| 126 | 626.8  | 0.01294 | 8.11 | 126 | 649.27 | 0.00227 | 1.47 |
| 127 | 631.95 | 0.00015 | 0.09 | 127 | 656.29 | 0.0048  | 3.15 |
| 128 | 633.49 | 0.01323 | 8.38 | 128 | 661.5  | 0.003   | 1.98 |
| 129 | 645.29 | 0       | 0    | 129 | 667.13 | 0.00001 | 0.01 |
| 130 | 658.34 | 0.00129 | 0.85 | 130 | 669.19 | 0.00001 | 0.01 |
| 131 | 663.57 | 0.00031 | 0.21 | 131 | 670.96 | 0       | 0    |
| 132 | 666.74 | 0       | 0    | 132 | 671.47 | 0.00044 | 0.3  |
| 133 | 669.65 | 0.00003 | 0.02 | 133 | 676.46 | 0.00007 | 0.05 |
| 134 | 672.94 | 0.00112 | 0.76 | 134 | 682    | 0.00014 | 0.1  |
| 135 | 673.27 | 0.00668 | 4.5  | 135 | 684.14 | 0.00442 | 3.03 |
| 136 | 675.3  | 0.00001 | 0.01 | 136 | 711.51 | 0.00466 | 3.32 |
| 137 | 682.53 | 0       | 0    | 137 | 713.63 | 0.00025 | 0.18 |
| 138 | 684.11 | 0.00003 | 0.02 | 138 | 716.41 | 0.00207 | 1.49 |
| 139 | 696.64 | 0       | 0    | 139 | 718.3  | 0.00043 | 0.31 |
| 140 | 713.74 | 0       | 0    | 140 | 737.53 | 0.00078 | 0.57 |
| 141 | 714.77 | 0.0018  | 1.28 | 141 | 750.78 | 0.00145 | 1.09 |
| 142 | 714.94 | 0.00375 | 2.68 | 142 | 757.67 | 0.00076 | 0.57 |
| 143 | 721.87 | 0       | 0    | 143 | 761.91 | 0.00237 | 1.8  |
| 144 | 754.92 | 0.00008 | 0.06 | 144 | 764.38 | 0.00011 | 0.08 |
| 145 | 756.61 | 0.00134 | 1.01 | 145 | 767.91 | 0       | 0    |
| 146 | 763.42 | 0.00098 | 0.75 | 146 | 772.92 | 0.00021 | 0.16 |
| 147 | 770.23 | 0       | 0    | 147 | 777.03 | 0.00005 | 0.04 |
| 148 | 777.03 | 0.00001 | 0.01 | 148 | 780.44 | 0.00857 | 6.69 |
| 149 | 779.08 | 0.00168 | 1.31 | 149 | 782.64 | 0.00353 | 2.77 |
| 150 | 793.25 | 0.00014 | 0.11 | 150 | 786.09 | 0.0016  | 1.26 |
| 151 | 795.97 | 0.00252 | 2.01 | 151 | 795.87 | 0.00362 | 2.88 |
| 152 | 796.43 | 0.00069 | 0.55 | 152 | 802.88 | 0.00229 | 1.84 |
| 153 | 798.2  | 0.00004 | 0.04 | 153 | 809.14 | 0.0057  | 4.61 |
| 154 | 807.07 | 0       | 0    | 154 | 810.21 | 0.00147 | 1.19 |
| 155 | 809.73 | 0.0147  | 11.9 | 155 | 820.3  | 0.00005 | 0.04 |
| 156 | 826.68 | 0.00001 | 0    | 156 | 827.38 | 0.00053 | 0.44 |
| 157 | 838.86 | 0.00003 | 0.02 | 157 | 840.99 | 0.00067 | 0.56 |
| 158 | 839.58 | 0.00001 | 0.01 | 158 | 842.08 | 0.00008 | 0.07 |
| 159 | 840.9  | 0.00003 | 0.02 | 159 | 842.57 | 0.0005  | 0.42 |
| 160 | 841.88 | 0.00024 | 0.2  | 160 | 844.68 | 0.00002 | 0.02 |
| 161 | 843.45 | 0.00004 | 0.03 | 161 | 846.1  | 0.00005 | 0.04 |

|     |         |         |      |     |         |         |      |
|-----|---------|---------|------|-----|---------|---------|------|
| 162 | 845.01  | 0.00044 | 0.37 | 162 | 849.62  | 0       | 0    |
| 163 | 847.53  | 0.00231 | 1.96 | 163 | 867.81  | 0.00003 | 0.03 |
| 164 | 849.9   | 0.00001 | 0    | 164 | 871.62  | 0.00007 | 0.06 |
| 165 | 865.8   | 0.01082 | 9.37 | 165 | 887.5   | 0.00137 | 1.22 |
| 166 | 894.18  | 0       | 0    | 166 | 892.55  | 0.00018 | 0.16 |
| 167 | 896.8   | 0.00032 | 0.29 | 167 | 894.3   | 0.00001 | 0.01 |
| 168 | 897.08  | 0       | 0    | 168 | 894.55  | 0.00005 | 0.04 |
| 169 | 902.06  | 0       | 0    | 169 | 902.97  | 0.00001 | 0.01 |
| 170 | 904.17  | 0       | 0    | 170 | 904.74  | 0.00001 | 0.01 |
| 171 | 910.9   | 0.00417 | 3.8  | 171 | 913.01  | 0.00011 | 0.1  |
| 172 | 914.91  | 0.00027 | 0.25 | 172 | 917.12  | 0.00059 | 0.54 |
| 173 | 915.97  | 0.0004  | 0.37 | 173 | 920.56  | 0.00052 | 0.48 |
| 174 | 926.34  | 0.00004 | 0.04 | 174 | 929.56  | 0.00014 | 0.13 |
| 175 | 931     | 0.00054 | 0.5  | 175 | 931.26  | 0.00017 | 0.16 |
| 176 | 932.51  | 0.00013 | 0.12 | 176 | 932.62  | 0.00011 | 0.1  |
| 177 | 933.66  | 0.00015 | 0.14 | 177 | 933.77  | 0       | 0    |
| 178 | 936.31  | 0       | 0    | 178 | 934.24  | 0       | 0    |
| 179 | 936.45  | 0       | 0    | 179 | 936.52  | 0       | 0    |
| 180 | 936.63  | 0.00002 | 0.02 | 180 | 936.71  | 0.00001 | 0.01 |
| 181 | 936.78  | 0.00003 | 0.03 | 181 | 937.26  | 0       | 0    |
| 182 | 938.37  | 0.00001 | 0.01 | 182 | 938.44  | 0.00001 | 0.01 |
| 183 | 944.07  | 0       | 0    | 183 | 944.59  | 0.00005 | 0.05 |
| 184 | 947.12  | 0       | 0    | 184 | 946.1   | 0       | 0    |
| 185 | 947.76  | 0.00002 | 0.02 | 185 | 946.62  | 0.00001 | 0.01 |
| 186 | 948.23  | 0       | 0    | 186 | 948.15  | 0.00009 | 0.09 |
| 187 | 948.34  | 0       | 0    | 187 | 948.62  | 0       | 0    |
| 188 | 948.81  | 0.00015 | 0.15 | 188 | 950.03  | 0       | 0    |
| 189 | 949.67  | 0       | 0    | 189 | 951.52  | 0.00001 | 0.01 |
| 190 | 950.56  | 0.00001 | 0.01 | 190 | 957.94  | 0.00003 | 0.03 |
| 191 | 960.19  | 0       | 0    | 191 | 961.52  | 0.00047 | 0.46 |
| 192 | 963.25  | 0.00002 | 0.02 | 192 | 965.04  | 0.00004 | 0.03 |
| 193 | 964.45  | 0.00003 | 0.03 | 193 | 972.05  | 0       | 0    |
| 194 | 968     | 0.00124 | 1.2  | 194 | 972.89  | 0       | 0    |
| 195 | 972.09  | 0.00001 | 0.01 | 195 | 973.1   | 0       | 0    |
| 196 | 972.95  | 0       | 0    | 196 | 973.15  | 0       | 0    |
| 197 | 973.02  | 0       | 0    | 197 | 973.37  | 0.00001 | 0.01 |
| 198 | 973.06  | 0       | 0    | 198 | 975.06  | 0       | 0    |
| 199 | 973.79  | 0       | 0    | 199 | 981.65  | 0.00215 | 2.11 |
| 200 | 973.97  | 0.00001 | 0.01 | 200 | 985.59  | 0.00091 | 0.9  |
| 201 | 977.78  | 0       | 0    | 201 | 991.58  | 0.00028 | 0.28 |
| 202 | 982.58  | 0       | 0    | 202 | 1025.71 | 0.00137 | 1.41 |
| 203 | 1024.7  | 0.0048  | 4.92 | 203 | 1028.07 | 0.00239 | 2.46 |
| 204 | 1031.82 | 0.00001 | 0.01 | 204 | 1053.02 | 0.00001 | 0.01 |

|     |         |         |       |     |         |         |       |
|-----|---------|---------|-------|-----|---------|---------|-------|
| 205 | 1054.77 | 0.00018 | 0.19  | 205 | 1055.6  | 0       | 0     |
| 206 | 1055.18 | 0.0005  | 0.53  | 206 | 1055.97 | 0       | 0     |
| 207 | 1056.02 | 0.00035 | 0.37  | 207 | 1056.72 | 0.00008 | 0.09  |
| 208 | 1056.71 | 0.00004 | 0.04  | 208 | 1057.11 | 0.00065 | 0.69  |
| 209 | 1056.99 | 0.00007 | 0.07  | 209 | 1058.51 | 0.00017 | 0.19  |
| 210 | 1057.55 | 0.00021 | 0.22  | 210 | 1061.84 | 0.00001 | 0.01  |
| 211 | 1061.48 | 0       | 0     | 211 | 1062.03 | 0       | 0     |
| 212 | 1061.94 | 0       | 0     | 212 | 1062.06 | 0       | 0     |
| 213 | 1062.12 | 0       | 0     | 213 | 1062.9  | 0.00001 | 0.01  |
| 214 | 1062.18 | 0       | 0     | 214 | 1063.12 | 0.00001 | 0.01  |
| 215 | 1062.21 | 0       | 0     | 215 | 1071.39 | 0.00014 | 0.15  |
| 216 | 1062.9  | 0       | 0     | 216 | 1073.23 | 0.00067 | 0.72  |
| 217 | 1074.28 | 0.00001 | 0.01  | 217 | 1091.28 | 0.00271 | 2.96  |
| 218 | 1075.83 | 0       | 0     | 218 | 1102.84 | 0.00254 | 2.8   |
| 219 | 1113.41 | 0.0077  | 8.57  | 219 | 1111.15 | 0.01466 | 16.29 |
| 220 | 1123.31 | 0.00002 | 0.02  | 220 | 1130.35 | 0.00087 | 0.98  |
| 221 | 1132.92 | 0.00015 | 0.17  | 221 | 1133.11 | 0.00001 | 0.01  |
| 222 | 1133.65 | 0.00161 | 1.83  | 222 | 1136.78 | 0.00098 | 1.12  |
| 223 | 1143.82 | 0.00005 | 0.05  | 223 | 1146.33 | 0.00015 | 0.18  |
| 224 | 1147.23 | 0.00075 | 0.86  | 224 | 1148.19 | 0.00735 | 8.44  |
| 225 | 1152.43 | 0.006   | 6.91  | 225 | 1151.41 | 0.004   | 4.6   |
| 226 | 1155.66 | 0.00026 | 0.3   | 226 | 1167.24 | 0.00126 | 1.47  |
| 227 | 1171.8  | 0.00012 | 0.15  | 227 | 1172.93 | 0.00001 | 0.01  |
| 228 | 1172.76 | 0.0001  | 0.12  | 228 | 1176.16 | 0.00114 | 1.34  |
| 229 | 1183.51 | 0.00015 | 0.18  | 229 | 1192.47 | 0.00025 | 0.3   |
| 230 | 1199.63 | 0.00002 | 0.02  | 230 | 1198.23 | 0.00021 | 0.25  |
| 231 | 1201.45 | 0.00052 | 0.62  | 231 | 1202.12 | 0.00003 | 0.03  |
| 232 | 1221.5  | 0.00006 | 0.07  | 232 | 1217.69 | 0.00059 | 0.71  |
| 233 | 1237.44 | 0.0033  | 4.08  | 233 | 1222.73 | 0.00112 | 1.37  |
| 234 | 1237.68 | 0.00917 | 11.35 | 234 | 1232.04 | 0.03169 | 39.04 |
| 235 | 1238.17 | 0.00023 | 0.28  | 235 | 1237.53 | 0.00074 | 0.91  |
| 236 | 1238.34 | 0.00095 | 1.17  | 236 | 1238.54 | 0.00004 | 0.04  |
| 237 | 1238.48 | 0.00021 | 0.26  | 237 | 1238.59 | 0.00009 | 0.11  |
| 238 | 1238.56 | 0.00001 | 0.02  | 238 | 1238.65 | 0.00002 | 0.03  |
| 239 | 1238.63 | 0.00004 | 0.05  | 239 | 1239.3  | 0.00006 | 0.07  |
| 240 | 1239.08 | 0.00006 | 0.08  | 240 | 1239.37 | 0.00025 | 0.31  |
| 241 | 1239.46 | 0.00001 | 0.01  | 241 | 1240.88 | 0.00048 | 0.6   |
| 242 | 1240.37 | 0.00146 | 1.81  | 242 | 1241.07 | 0.00026 | 0.32  |
| 243 | 1240.78 | 0.0003  | 0.37  | 243 | 1242.35 | 0.00047 | 0.58  |
| 244 | 1242.8  | 0.00024 | 0.29  | 244 | 1245.84 | 0.00664 | 8.28  |
| 245 | 1249.2  | 0.0006  | 0.75  | 245 | 1250.17 | 0.00007 | 0.09  |
| 246 | 1252.84 | 0.011   | 13.78 | 246 | 1257.81 | 0.00019 | 0.24  |
| 247 | 1257.54 | 0.00501 | 6.3   | 247 | 1264.86 | 0.00018 | 0.22  |

|     |         |         |        |     |         |         |       |
|-----|---------|---------|--------|-----|---------|---------|-------|
| 248 | 1266.64 | 0.00031 | 0.4    | 248 | 1269.06 | 0.0007  | 0.88  |
| 249 | 1271.18 | 0.00019 | 0.25   | 249 | 1275.57 | 0.00171 | 2.18  |
| 250 | 1274.87 | 0.00489 | 6.23   | 250 | 1278.47 | 0.00654 | 8.36  |
| 251 | 1278.41 | 0       | 0      | 251 | 1284.75 | 0.01279 | 16.43 |
| 252 | 1281.94 | 0.00491 | 6.3    | 252 | 1286.76 | 0       | 0     |
| 253 | 1290.26 | 0.00014 | 0.18   | 253 | 1290.07 | 0.00647 | 8.35  |
| 254 | 1294.56 | 0.00756 | 9.79   | 254 | 1292.13 | 0.00086 | 1.12  |
| 255 | 1295.89 | 0.01899 | 24.61  | 255 | 1298.3  | 0.00085 | 1.1   |
| 256 | 1298.83 | 0.00117 | 1.52   | 256 | 1299.53 | 0.0009  | 1.17  |
| 257 | 1301.76 | 0.00404 | 5.25   | 257 | 1306.96 | 0.01247 | 16.29 |
| 258 | 1303.47 | 0.00064 | 0.83   | 258 | 1313.88 | 0.00575 | 7.55  |
| 259 | 1316.99 | 0.10286 | 135.47 | 259 | 1318.13 | 0.00015 | 0.2   |
| 260 | 1323.89 | 0.0004  | 0.53   | 260 | 1324.26 | 0.00308 | 4.07  |
| 261 | 1324.59 | 0.04627 | 61.29  | 261 | 1329.11 | 0.02879 | 38.27 |
| 262 | 1337.64 | 0.00007 | 0.09   | 262 | 1338.97 | 0.00633 | 8.48  |
| 263 | 1338.04 | 0.00048 | 0.65   | 263 | 1341.49 | 0       | 0.01  |
| 264 | 1343.36 | 0.01907 | 25.62  | 264 | 1346.73 | 0.02459 | 33.11 |
| 265 | 1349.19 | 0.04246 | 57.28  | 265 | 1348.07 | 0       | 0     |
| 266 | 1353.03 | 0.00132 | 1.78   | 266 | 1355.94 | 0.03443 | 46.69 |
| 267 | 1360.82 | 0.00159 | 2.16   | 267 | 1365.5  | 0.01138 | 15.54 |
| 268 | 1362.66 | 0.00345 | 4.71   | 268 | 1367.55 | 0.00823 | 11.26 |
| 269 | 1366.83 | 0.00047 | 0.64   | 269 | 1370.13 | 0.03657 | 50.1  |
| 270 | 1370.2  | 0.00402 | 5.51   | 270 | 1373.83 | 0.01681 | 23.1  |
| 271 | 1379.12 | 0.03485 | 48.07  | 271 | 1376.59 | 0.00118 | 1.62  |
| 272 | 1380.25 | 0.00367 | 5.06   | 272 | 1382.04 | 0.00211 | 2.91  |
| 273 | 1387.69 | 0.00002 | 0.02   | 273 | 1387.38 | 0       | 0     |
| 274 | 1400.98 | 0.00021 | 0.3    | 274 | 1400.19 | 0.00199 | 2.79  |
| 275 | 1411.47 | 0.06012 | 84.86  | 275 | 1404.37 | 0.00658 | 9.24  |
| 276 | 1423.37 | 0.00168 | 2.39   | 276 | 1405.88 | 0.01651 | 23.21 |
| 277 | 1423.56 | 0       | 0      | 277 | 1423.86 | 0.00001 | 0.02  |
| 278 | 1425.58 | 0.0008  | 1.15   | 278 | 1425.09 | 0.00055 | 0.78  |
| 279 | 1425.83 | 0.00001 | 0.02   | 279 | 1425.71 | 0.00014 | 0.21  |
| 280 | 1426.33 | 0.0007  | 0.99   | 280 | 1426.22 | 0.00002 | 0.03  |
| 281 | 1426.45 | 0.00017 | 0.24   | 281 | 1426.63 | 0       | 0     |
| 282 | 1426.53 | 0       | 0      | 282 | 1426.75 | 0       | 0     |
| 283 | 1426.6  | 0.00001 | 0.02   | 283 | 1426.91 | 0.00009 | 0.13  |
| 284 | 1426.61 | 0.00001 | 0.01   | 284 | 1427.08 | 0.00002 | 0.03  |
| 285 | 1426.8  | 0.00019 | 0.27   | 285 | 1427.35 | 0       | 0.01  |
| 286 | 1427.38 | 0.00002 | 0.03   | 286 | 1427.4  | 0.00001 | 0.01  |
| 287 | 1427.49 | 0.0023  | 3.29   | 287 | 1443.09 | 0.00039 | 0.57  |
| 288 | 1440.57 | 0.00056 | 0.81   | 288 | 1447.47 | 0.00074 | 1.06  |
| 289 | 1442.79 | 0.00001 | 0.01   | 289 | 1453.93 | 0.00001 | 0.02  |
| 290 | 1455.01 | 0.00011 | 0.16   | 290 | 1457.92 | 0.0018  | 2.63  |

|     |         |         |       |     |         |         |      |
|-----|---------|---------|-------|-----|---------|---------|------|
| 291 | 1456    | 0.00428 | 6.24  | 291 | 1458.18 | 0.00265 | 3.86 |
| 292 | 1457.73 | 0       | 0     | 292 | 1458.62 | 0.00015 | 0.22 |
| 293 | 1458.06 | 0.00018 | 0.26  | 293 | 1458.77 | 0.00107 | 1.56 |
| 294 | 1458.4  | 0.00007 | 0.1   | 294 | 1459.35 | 0.00012 | 0.18 |
| 295 | 1458.51 | 0.00027 | 0.39  | 295 | 1459.93 | 0.00334 | 4.88 |
| 296 | 1459.26 | 0.00001 | 0.02  | 296 | 1470.54 | 0.00523 | 7.69 |
| 297 | 1460.05 | 0.00047 | 0.69  | 297 | 1481.1  | 0.00667 | 9.87 |
| 298 | 1471.7  | 0.00001 | 0.02  | 298 | 1490.38 | 0.00025 | 0.38 |
| 299 | 1480.57 | 0.01252 | 18.53 | 299 | 1493.71 | 0.00012 | 0.18 |
| 300 | 1491.75 | 0       | 0     | 300 | 1495.65 | 0.00027 | 0.4  |
| 301 | 1494.74 | 0       | 0     | 301 | 1500.54 | 0.00029 | 0.43 |
| 302 | 1501.97 | 0       | 0     | 302 | 1511.38 | 0.00001 | 0.01 |
| 303 | 1512.3  | 0.00001 | 0.01  | 303 | 1512.61 | 0       | 0    |
| 304 | 1512.36 | 0       | 0     | 304 | 1512.67 | 0       | 0    |
| 305 | 1512.6  | 0       | 0     | 305 | 1512.96 | 0       | 0.01 |
| 306 | 1512.64 | 0       | 0     | 306 | 1513.43 | 0.00001 | 0.01 |
| 307 | 1512.77 | 0       | 0     | 307 | 1515.52 | 0.00036 | 0.54 |
| 308 | 1513.12 | 0       | 0.01  | 308 | 1516.24 | 0.00068 | 1.03 |
| 309 | 1515.45 | 0.00022 | 0.33  | 309 | 1516.4  | 0.00001 | 0.02 |
| 310 | 1516.27 | 0.00001 | 0.01  | 310 | 1516.4  | 0       | 0.01 |
| 311 | 1516.37 | 0       | 0     | 311 | 1517.02 | 0.00004 | 0.06 |
| 312 | 1516.46 | 0       | 0.01  | 312 | 1517.47 | 0       | 0    |
| 313 | 1516.56 | 0.00002 | 0.04  | 313 | 1518.32 | 0.00001 | 0.01 |
| 314 | 1516.69 | 0       | 0     | 314 | 1520.52 | 0       | 0.01 |
| 315 | 1517.16 | 0.00017 | 0.26  | 315 | 1520.74 | 0.00018 | 0.28 |
| 316 | 1517.26 | 0       | 0.01  | 316 | 1521.46 | 0.00006 | 0.09 |
| 317 | 1517.65 | 0.00024 | 0.37  | 317 | 1522.24 | 0.00014 | 0.22 |
| 318 | 1519.64 | 0.00014 | 0.21  | 318 | 1523.1  | 0.00019 | 0.29 |
| 319 | 1520.79 | 0       | 0     | 319 | 1527.17 | 0.00031 | 0.47 |
| 320 | 1521.45 | 0.00004 | 0.06  | 320 | 1529.01 | 0.00012 | 0.19 |
| 321 | 1523.53 | 0.00042 | 0.63  | 321 | 1532.94 | 0.00008 | 0.12 |
| 322 | 1527.52 | 0.00034 | 0.52  | 322 | 1534.57 | 0.00096 | 1.47 |
| 323 | 1529.26 | 0       | 0.01  | 323 | 1535.15 | 0.00006 | 0.09 |
| 324 | 1530.78 | 0.00018 | 0.28  | 324 | 1535.24 | 0.00162 | 2.49 |
| 325 | 1534.3  | 0.00001 | 0.01  | 325 | 1536.29 | 0.00001 | 0.01 |
| 326 | 1534.65 | 0       | 0     | 326 | 1537.4  | 0.00001 | 0.01 |
| 327 | 1535.19 | 0.00009 | 0.15  | 327 | 1537.95 | 0       | 0    |
| 328 | 1536.09 | 0.00013 | 0.2   | 328 | 1538.06 | 0       | 0    |
| 329 | 1536.82 | 0       | 0     | 329 | 1538.77 | 0.00003 | 0.04 |
| 330 | 1537.16 | 0.00001 | 0.01  | 330 | 1539.04 | 0       | 0.01 |
| 331 | 1537.29 | 0       | 0     | 331 | 1540.02 | 0       | 0    |
| 332 | 1537.81 | 0       | 0     | 332 | 1548.35 | 0.00022 | 0.34 |
| 333 | 1538.03 | 0       | 0     | 333 | 1550.32 | 0       | 0    |



|     |         |         |      |     |         |         |      |
|-----|---------|---------|------|-----|---------|---------|------|
| 334 | 1538.48 | 0.00001 | 0.01 | 334 | 1550.46 | 0       | 0    |
| 335 | 1538.93 | 0.00001 | 0.01 | 335 | 1550.56 | 0       | 0    |
| 336 | 1539.54 | 0       | 0    | 336 | 1551.2  | 0       | 0    |
| 337 | 1548.35 | 0.00005 | 0.08 | 337 | 1552.1  | 0.00001 | 0.01 |
| 338 | 1549.2  | 0       | 0    | 338 | 1588.64 | 0.00084 | 1.33 |
| 339 | 1549.36 | 0       | 0    | 339 | 1617.19 | 0.00004 | 0.06 |
| 340 | 1550.18 | 0       | 0    | 340 | 1622.86 | 0.00015 | 0.24 |
| 341 | 1550.49 | 0       | 0    | 341 | 1624.92 | 0.00015 | 0.24 |
| 342 | 1550.8  | 0       | 0.01 | 342 | 1627.65 | 0.00006 | 0.09 |
| 343 | 1555.26 | 0.00066 | 1.03 | 343 | 1633.67 | 0.00057 | 0.93 |
| 344 | 1599.63 | 0.00101 | 1.62 | 344 | 1636.57 | 0.00128 | 2.09 |
| 345 | 1616.9  | 0       | 0    | 345 | 1640.66 | 0.00349 | 5.72 |
| 346 | 1621.69 | 0.00031 | 0.5  | 346 | 1647.39 | 0.00558 | 9.19 |
| 347 | 1623.56 | 0.00021 | 0.35 | 347 | 1652.88 | 0.00018 | 0.3  |
| 348 | 1624.2  | 0.00066 | 1.07 | 348 | 1653.98 | 0.00024 | 0.39 |
| 349 | 1634.18 | 0.00143 | 2.34 | 349 | 1661.85 | 0.00217 | 3.61 |
| 350 | 1636.12 | 0.00573 | 9.37 | 350 | 1666.54 | 0.00199 | 3.31 |
| 351 | 1653.81 | 0.00006 | 0.1  | 351 | 1672.98 | 0.0002  | 0.33 |
| 352 | 1655.17 | 0.00115 | 1.9  | 352 | 1673.3  | 0.00084 | 1.4  |
| 353 | 1662    | 0.00169 | 2.8  | 353 | 3041.07 | 0       | 0    |
| 354 | 1664.31 | 0.0032  | 5.33 | 354 | 3041.07 | 0       | 0    |
| 355 | 1671.77 | 0.0001  | 0.17 | 355 | 3041.38 | 0       | 0    |
| 356 | 1673.7  | 0.00034 | 0.57 | 356 | 3041.92 | 0       | 0.01 |
| 357 | 3041.33 | 0       | 0    | 357 | 3041.97 | 0       | 0    |
| 358 | 3041.34 | 0       | 0    | 358 | 3042.06 | 0       | 0    |
| 359 | 3041.49 | 0       | 0    | 359 | 3042.2  | 0       | 0    |
| 360 | 3041.72 | 0       | 0    | 360 | 3042.45 | 0       | 0    |
| 361 | 3041.84 | 0       | 0    | 361 | 3042.45 | 0       | 0.01 |
| 362 | 3041.87 | 0.00001 | 0.04 | 362 | 3042.98 | 0       | 0    |
| 363 | 3042.04 | 0.00001 | 0.02 | 363 | 3049.9  | 0.00003 | 0.1  |
| 364 | 3042.23 | 0       | 0    | 364 | 3049.97 | 0.00002 | 0.06 |
| 365 | 3042.57 | 0       | 0    | 365 | 3050.11 | 0.00093 | 2.85 |
| 366 | 3043.08 | 0       | 0.01 | 366 | 3050.31 | 0.00014 | 0.42 |
| 367 | 3043.18 | 0       | 0.01 | 367 | 3050.75 | 0.00009 | 0.27 |
| 368 | 3043.88 | 0.00002 | 0.06 | 368 | 3105.99 | 0       | 0    |
| 369 | 3049.71 | 0.00045 | 1.37 | 369 | 3106.31 | 0       | 0    |
| 370 | 3050.08 | 0       | 0    | 370 | 3106.39 | 0       | 0    |
| 371 | 3050.24 | 0       | 0    | 371 | 3106.45 | 0       | 0    |
| 372 | 3051.19 | 0.00007 | 0.21 | 372 | 3106.68 | 0       | 0    |
| 373 | 3051.35 | 0       | 0.01 | 373 | 3107.05 | 0       | 0    |
| 374 | 3051.44 | 0.00053 | 1.62 | 374 | 3107.07 | 0.00001 | 0.03 |
| 375 | 3105.89 | 0       | 0.01 | 375 | 3107.41 | 0.00002 | 0.05 |
| 376 | 3106.19 | 0       | 0    | 376 | 3107.91 | 0       | 0    |

|     |         |         |      |     |         |         |      |
|-----|---------|---------|------|-----|---------|---------|------|
| 377 | 3106.19 | 0       | 0    | 377 | 3108.03 | 0       | 0    |
| 378 | 3106.77 | 0       | 0    | 378 | 3113.12 | 0.00001 | 0.02 |
| 379 | 3106.93 | 0       | 0    | 379 | 3113.9  | 0       | 0    |
| 380 | 3107.28 | 0       | 0.01 | 380 | 3114.2  | 0       | 0    |
| 381 | 3107.34 | 0       | 0.01 | 381 | 3114.44 | 0       | 0    |
| 382 | 3107.37 | 0       | 0    | 382 | 3114.62 | 0       | 0    |
| 383 | 3107.6  | 0       | 0    | 383 | 3115.06 | 0.00001 | 0.03 |
| 384 | 3107.92 | 0       | 0.01 | 384 | 3115.46 | 0.00017 | 0.52 |
| 385 | 3108.02 | 0       | 0    | 385 | 3115.98 | 0.00001 | 0.04 |
| 386 | 3108.75 | 0.00001 | 0.03 | 386 | 3116.11 | 0       | 0    |
| 387 | 3113.06 | 0       | 0    | 387 | 3118.99 | 0       | 0    |
| 388 | 3114.2  | 0       | 0    | 388 | 3120.19 | 0       | 0    |
| 389 | 3114.36 | 0       | 0    | 389 | 3120.46 | 0       | 0    |
| 390 | 3115.26 | 0       | 0.01 | 390 | 3121.21 | 0       | 0    |
| 391 | 3115.4  | 0       | 0    | 391 | 3121.64 | 0.00001 | 0.02 |
| 392 | 3115.64 | 0.00001 | 0.02 | 392 | 3121.67 | 0       | 0    |
| 393 | 3115.79 | 0.00003 | 0.08 | 393 | 3122.44 | 0       | 0    |
| 394 | 3115.93 | 0.00001 | 0.03 | 394 | 3122.75 | 0       | 0    |
| 395 | 3116.21 | 0.00001 | 0.04 | 395 | 3124.24 | 0       | 0    |
| 396 | 3116.7  | 0.00009 | 0.29 | 396 | 3124.53 | 0       | 0.01 |
| 397 | 3117.92 | 0       | 0    | 397 | 3125.13 | 0       | 0.01 |
| 398 | 3117.95 | 0       | 0    | 398 | 3185.05 | 0       | 0    |
| 399 | 3119.39 | 0.00001 | 0.04 | 399 | 3186.44 | 0.00003 | 0.08 |
| 400 | 3120.47 | 0       | 0    | 400 | 3189.65 | 0.00007 | 0.21 |
| 401 | 3120.7  | 0       | 0    | 401 | 3190.44 | 0.00001 | 0.02 |
| 402 | 3121.12 | 0       | 0    | 402 | 3195.97 | 0       | 0    |
| 403 | 3121.16 | 0       | 0    | 403 | 3196.1  | 0.00002 | 0.06 |
| 404 | 3121.21 | 0       | 0    | 404 | 3201.51 | 0.00002 | 0.05 |
| 405 | 3121.93 | 0.00002 | 0.06 | 405 | 3209.44 | 0.00004 | 0.12 |
| 406 | 3122.38 | 0       | 0    | 406 | 3209.94 | 0.00001 | 0.03 |
| 407 | 3122.49 | 0       | 0    | 407 | 3217.79 | 0       | 0    |
| 408 | 3122.76 | 0       | 0    | 408 | 3219.67 | 0.00003 | 0.08 |
| 409 | 3123.15 | 0       | 0    | 409 | 3221.39 | 0.00002 | 0.06 |
| 410 | 3124.11 | 0.00003 | 0.09 | 410 | 3222.69 | 0       | 0    |
| 411 | 3189.87 | 0       | 0    | 411 | 3226.95 | 0.00003 | 0.09 |
| 412 | 3193.22 | 0.00002 | 0.05 | 412 | 3229.09 | 0       | 0    |
| 413 | 3193.65 | 0       | 0.01 | 413 | 3237.54 | 0.00004 | 0.12 |
| 414 | 3194.94 | 0.00001 | 0.04 | 414 | 3245.32 | 0       | 0.01 |
| 415 | 3195.09 | 0.00002 | 0.06 | 415 | 3248.09 | 0.00013 | 0.44 |
| 416 | 3212.88 | 0.00001 | 0.04 | 416 | 3255.08 | 0.00001 | 0.02 |
| 417 | 3217.23 | 0       | 0    | 417 | 3295.19 | 0       | 0.01 |
| 418 | 3218.29 | 0       | 0    |     |         |         |      |
| 419 | 3218.71 | 0.00008 | 0.26 |     |         |         |      |

|                |                              |         |                               |                |                              |         |                               |
|----------------|------------------------------|---------|-------------------------------|----------------|------------------------------|---------|-------------------------------|
| 420            | 3223.05                      | 0.00019 | 0.61                          |                |                              |         |                               |
| 421            | 3228.18                      | 0.00016 | 0.52                          |                |                              |         |                               |
| 422            | 3234.65                      | 0       | 0.01                          |                |                              |         |                               |
| 423            | 3235.49                      | 0.00002 | 0.07                          |                |                              |         |                               |
| 424            | 3248.61                      | 0.00014 | 0.45                          |                |                              |         |                               |
| 425            | 3317.02                      | 0.00001 | 0.02                          |                |                              |         |                               |
| 426            | 3317.98                      | 0.00001 | 0.02                          |                |                              |         |                               |
| Compound       | <b>p[B-N]N</b>               |         |                               |                |                              |         |                               |
| vibration mode | $\omega$ (cm <sup>-1</sup> ) | S       | $\lambda$ (cm <sup>-1</sup> ) | vibration mode | $\omega$ (cm <sup>-1</sup> ) | S       | $\lambda$ (cm <sup>-1</sup> ) |
| 1              | 0                            | 0       | 0                             | 205            | 1055.32                      | 0.00018 | 0.19                          |
| 2              | 0                            | 0       | 0                             | 206            | 1055.38                      | 0       | 0                             |
| 3              | 0                            | 0       | 0                             | 207            | 1057.95                      | 0.00131 | 1.39                          |
| 4              | 0                            | 0       | 0                             | 208            | 1058.38                      | 0       | 0                             |
| 5              | 0.01                         | 0       | 0                             | 209            | 1061.73                      | 0       | 0                             |
| 6              | 0.01                         | 0       | 0                             | 210            | 1061.75                      | 0       | 0                             |
| 7              | 12.25                        | 0.23896 | 2.93                          | 211            | 1062.5                       | 0.00004 | 0.04                          |
| 8              | 20.35                        | 1.57994 | 32.15                         | 212            | 1062.53                      | 0       | 0                             |
| 9              | 21.87                        | 0       | 0                             | 213            | 1069.44                      | 0.00373 | 3.99                          |
| 10             | 32.04                        | 0.16946 | 5.43                          | 214            | 1071.31                      | 0       | 0                             |
| 11             | 32.72                        | 0       | 0                             | 215            | 1090.18                      | 0.00501 | 5.46                          |
| 12             | 35.24                        | 0.39016 | 13.75                         | 216            | 1093.84                      | 0       | 0                             |
| 13             | 36.5                         | 0       | 0                             | 217            | 1097.49                      | 0.01217 | 13.35                         |
| 14             | 38.09                        | 0       | 0                             | 218            | 1110.54                      | 0       | 0                             |
| 15             | 40.06                        | 0.03225 | 1.29                          | 219            | 1113.17                      | 0.00674 | 7.51                          |
| 16             | 44.1                         | 0       | 0                             | 220            | 1130.52                      | 0       | 0                             |
| 17             | 50.25                        | 0.09621 | 4.83                          | 221            | 1137.9                       | 0       | 0                             |
| 18             | 50.95                        | 0.11026 | 5.62                          | 222            | 1138.39                      | 0.0023  | 2.62                          |
| 19             | 58.6                         | 0       | 0                             | 223            | 1147.74                      | 0.01359 | 15.6                          |
| 20             | 71.84                        | 0       | 0                             | 224            | 1150.06                      | 0       | 0                             |
| 21             | 72.8                         | 0.00079 | 0.06                          | 225            | 1156.85                      | 0.00446 | 5.16                          |
| 22             | 82.04                        | 0.24904 | 20.43                         | 226            | 1165.81                      | 0       | 0                             |
| 23             | 84.65                        | 0       | 0                             | 227            | 1177.32                      | 0.00012 | 0.14                          |
| 24             | 94.32                        | 0.01302 | 1.23                          | 228            | 1191.41                      | 0       | 0                             |
| 25             | 94.6                         | 0       | 0                             | 229            | 1191.58                      | 0       | 0                             |
| 26             | 110.24                       | 0       | 0                             | 230            | 1198.36                      | 0       | 0                             |
| 27             | 113.44                       | 0.01869 | 2.12                          | 231            | 1200.15                      | 0.00044 | 0.53                          |
| 28             | 124.37                       | 0.02482 | 3.09                          | 232            | 1211.88                      | 0       | 0                             |
| 29             | 124.38                       | 0       | 0                             | 233            | 1222.19                      | 0.00053 | 0.65                          |
| 30             | 139.32                       | 0       | 0                             | 234            | 1222.68                      | 0       | 0                             |
| 31             | 145.44                       | 0.00952 | 1.38                          | 235            | 1228.41                      | 0.03739 | 45.93                         |

|    |        |         |       |     |         |         |       |
|----|--------|---------|-------|-----|---------|---------|-------|
| 32 | 153.48 | 0.01242 | 1.91  | 236 | 1238.39 | 0       | 0     |
| 33 | 159.65 | 0       | 0     | 237 | 1238.4  | 0.00003 | 0.03  |
| 34 | 160.63 | 0.04509 | 7.24  | 238 | 1238.48 | 0       | 0     |
| 35 | 170.18 | 0.00468 | 0.8   | 239 | 1239.05 | 0.00025 | 0.32  |
| 36 | 171.08 | 0       | 0     | 240 | 1240.24 | 0       | 0     |
| 37 | 180.75 | 0       | 0     | 241 | 1240.37 | 0.00116 | 1.43  |
| 38 | 197.16 | 0.00288 | 0.57  | 242 | 1240.65 | 0       | 0     |
| 39 | 202.84 | 0       | 0     | 243 | 1245.39 | 0.00548 | 6.82  |
| 40 | 209.86 | 0       | 0     | 244 | 1250.8  | 0       | 0     |
| 41 | 218.34 | 0.00001 | 0     | 245 | 1256.62 | 0       | 0     |
| 42 | 225.23 | 0.11166 | 25.15 | 246 | 1263.47 | 0.00093 | 1.17  |
| 43 | 231.53 | 0.00217 | 0.5   | 247 | 1268.25 | 0.00038 | 0.48  |
| 44 | 232.14 | 0       | 0     | 248 | 1273.1  | 0       | 0     |
| 45 | 235.21 | 0       | 0     | 249 | 1278.55 | 0       | 0     |
| 46 | 236.35 | 0.00005 | 0.01  | 250 | 1283.71 | 0.00437 | 5.61  |
| 47 | 238    | 0       | 0     | 251 | 1290.41 | 0.01072 | 13.84 |
| 48 | 239.81 | 0.00007 | 0.02  | 252 | 1292.81 | 0.00701 | 9.06  |
| 49 | 241.02 | 0.01654 | 3.99  | 253 | 1293.9  | 0       | 0     |
| 50 | 245.08 | 0       | 0     | 254 | 1294.85 | 0       | 0     |
| 51 | 260.7  | 0.00157 | 0.41  | 255 | 1298.08 | 0       | 0     |
| 52 | 263.35 | 0       | 0     | 256 | 1309.59 | 0.01305 | 17.1  |
| 53 | 274.3  | 0.00048 | 0.13  | 257 | 1314.57 | 0.01403 | 18.45 |
| 54 | 274.77 | 0       | 0     | 258 | 1316.09 | 0       | 0     |
| 55 | 277.13 | 0       | 0     | 259 | 1320.27 | 0       | 0     |
| 56 | 277.33 | 0.00021 | 0.06  | 260 | 1324.86 | 0.02104 | 27.88 |
| 57 | 290.46 | 0       | 0     | 261 | 1333.62 | 0       | 0     |
| 58 | 290.79 | 0.00994 | 2.89  | 262 | 1341    | 0       | 0     |
| 59 | 298.91 | 0       | 0     | 263 | 1343.6  | 0.0056  | 7.53  |
| 60 | 300.88 | 0.00981 | 2.95  | 264 | 1345.96 | 0.02126 | 28.61 |
| 61 | 307.11 | 0.0616  | 18.92 | 265 | 1353.55 | 0       | 0     |
| 62 | 311.12 | 0       | 0     | 266 | 1362.41 | 0       | 0     |
| 63 | 313.07 | 0.02157 | 6.75  | 267 | 1363.15 | 0.02735 | 37.28 |
| 64 | 316.85 | 0       | 0     | 268 | 1373.23 | 0.05938 | 81.54 |
| 65 | 321.64 | 0.00132 | 0.43  | 269 | 1375.3  | 0       | 0     |
| 66 | 325.61 | 0       | 0     | 270 | 1381.48 | 0       | 0     |
| 67 | 328.84 | 0       | 0     | 271 | 1382.11 | 0.00544 | 7.52  |
| 68 | 330.77 | 0.00019 | 0.06  | 272 | 1387.49 | 0       | 0     |
| 69 | 331.85 | 0       | 0     | 273 | 1389.06 | 0.00248 | 3.45  |
| 70 | 338.57 | 0.00095 | 0.32  | 274 | 1399.96 | 0.01461 | 20.45 |
| 71 | 339.2  | 0       | 0     | 275 | 1404.68 | 0       | 0     |
| 72 | 339.6  | 0.00064 | 0.22  | 276 | 1406.88 | 0.002   | 2.81  |
| 73 | 348.78 | 0       | 0     | 277 | 1410.33 | 0       | 0     |
| 74 | 352.42 | 0.00091 | 0.32  | 278 | 1425.56 | 0.00031 | 0.44  |

|     |        |         |       |     |         |         |       |
|-----|--------|---------|-------|-----|---------|---------|-------|
| 75  | 354.85 | 0       | 0     | 279 | 1426.36 | 0       | 0     |
| 76  | 361.28 | 0.00022 | 0.08  | 280 | 1426.49 | 0       | 0     |
| 77  | 363.74 | 0       | 0     | 281 | 1426.49 | 0       | 0     |
| 78  | 364.86 | 0.00015 | 0.06  | 282 | 1427.03 | 0       | 0.01  |
| 79  | 369.97 | 0       | 0     | 283 | 1427.05 | 0       | 0     |
| 80  | 370.65 | 0.02525 | 9.36  | 284 | 1427.29 | 0.00001 | 0.01  |
| 81  | 383.65 | 0       | 0     | 285 | 1427.91 | 0       | 0     |
| 82  | 386.16 | 0.01217 | 4.7   | 286 | 1446.44 | 0.00157 | 2.27  |
| 83  | 423.24 | 0       | 0     | 287 | 1451.42 | 0       | 0     |
| 84  | 430.88 | 0       | 0     | 288 | 1456.71 | 0       | 0     |
| 85  | 431.11 | 0.01385 | 5.97  | 289 | 1458.36 | 0.00327 | 4.77  |
| 86  | 435.18 | 0.00589 | 2.57  | 290 | 1458.49 | 0.01425 | 20.78 |
| 87  | 446.62 | 0       | 0     | 291 | 1458.54 | 0       | 0     |
| 88  | 448.44 | 0       | 0     | 292 | 1459.52 | 0       | 0     |
| 89  | 450.9  | 0.00622 | 2.81  | 293 | 1459.7  | 0.00201 | 2.93  |
| 90  | 453.09 | 0.02185 | 9.9   | 294 | 1472.73 | 0       | 0     |
| 91  | 455.59 | 0.00145 | 0.66  | 295 | 1482.66 | 0.00449 | 6.66  |
| 92  | 457.97 | 0       | 0     | 296 | 1492.85 | 0.00026 | 0.39  |
| 93  | 464.06 | 0.0269  | 12.48 | 297 | 1493.03 | 0       | 0     |
| 94  | 466.2  | 0       | 0     | 298 | 1494.61 | 0       | 0     |
| 95  | 476.15 | 0.00085 | 0.41  | 299 | 1495.48 | 0.00012 | 0.18  |
| 96  | 477.01 | 0       | 0     | 300 | 1501.51 | 0       | 0     |
| 97  | 479.61 | 0       | 0     | 301 | 1512.56 | 0       | 0     |
| 98  | 482.24 | 0       | 0     | 302 | 1512.56 | 0       | 0     |
| 99  | 489.66 | 0.00737 | 3.61  | 303 | 1513.35 | 0.00002 | 0.02  |
| 100 | 501    | 0.00004 | 0.02  | 304 | 1513.36 | 0       | 0     |
| 101 | 504.09 | 0       | 0     | 305 | 1515.08 | 0.00005 | 0.08  |
| 102 | 509.21 | 0       | 0     | 306 | 1516.66 | 0       | 0     |
| 103 | 522.99 | 0.00453 | 2.37  | 307 | 1516.66 | 0       | 0     |
| 104 | 527.23 | 0.01248 | 6.58  | 308 | 1516.99 | 0.00008 | 0.12  |
| 105 | 532.56 | 0       | 0     | 309 | 1517.02 | 0       | 0     |
| 106 | 541.78 | 0.00484 | 2.62  | 310 | 1517.89 | 0.00045 | 0.69  |
| 107 | 555.68 | 0       | 0     | 311 | 1518.9  | 0       | 0     |
| 108 | 556.57 | 0.00766 | 4.26  | 312 | 1522.02 | 0       | 0     |
| 109 | 561.79 | 0       | 0     | 313 | 1522.02 | 0.00003 | 0.04  |
| 110 | 574.28 | 0.00007 | 0.04  | 314 | 1522.94 | 0       | 0     |
| 111 | 579.84 | 0       | 0     | 315 | 1526.53 | 0.00112 | 1.71  |
| 112 | 586.02 | 0.0014  | 0.82  | 316 | 1530.59 | 0       | 0     |
| 113 | 587.01 | 0       | 0     | 317 | 1531.94 | 0.00003 | 0.04  |
| 114 | 591.63 | 0.00056 | 0.33  | 318 | 1534.46 | 0       | 0     |
| 115 | 595.5  | 0       | 0     | 319 | 1534.5  | 0       | 0     |
| 116 | 602.78 | 0       | 0     | 320 | 1535.57 | 0.00324 | 4.97  |
| 117 | 615.54 | 0.00038 | 0.23  | 321 | 1535.74 | 0       | 0     |

|     |        |         |      |     |         |         |       |
|-----|--------|---------|------|-----|---------|---------|-------|
| 118 | 627.64 | 0       | 0    | 322 | 1537.5  | 0       | 0     |
| 119 | 629.2  | 0.00002 | 0.01 | 323 | 1537.61 | 0.00001 | 0.02  |
| 120 | 640.82 | 0.0008  | 0.51 | 324 | 1537.88 | 0       | 0     |
| 121 | 642.99 | 0       | 0    | 325 | 1538.34 | 0.00002 | 0.03  |
| 122 | 645.47 | 0.0005  | 0.32 | 326 | 1540.03 | 0       | 0     |
| 123 | 652.62 | 0       | 0    | 327 | 1540.12 | 0.00004 | 0.06  |
| 124 | 660.32 | 0       | 0    | 328 | 1550.47 | 0       | 0     |
| 125 | 661.41 | 0.00078 | 0.51 | 329 | 1550.48 | 0.00001 | 0.01  |
| 126 | 667.08 | 0       | 0    | 330 | 1551.59 | 0       | 0     |
| 127 | 667.9  | 0.00361 | 2.41 | 331 | 1551.64 | 0       | 0     |
| 128 | 672.41 | 0       | 0    | 332 | 1572.99 | 0.00537 | 8.44  |
| 129 | 673.49 | 0.00125 | 0.84 | 333 | 1620.32 | 0       | 0     |
| 130 | 676.02 | 0.00001 | 0    | 334 | 1620.65 | 0.00021 | 0.34  |
| 131 | 679.65 | 0       | 0    | 335 | 1625.8  | 0       | 0     |
| 132 | 707.8  | 0.01313 | 9.29 | 336 | 1626.4  | 0.00001 | 0.02  |
| 133 | 712.08 | 0       | 0    | 337 | 1633.56 | 0       | 0     |
| 134 | 713.62 | 0.00152 | 1.09 | 338 | 1634.89 | 0.00051 | 0.83  |
| 135 | 717.6  | 0.00007 | 0.05 | 339 | 1641.14 | 0       | 0     |
| 136 | 723.98 | 0       | 0    | 340 | 1641.36 | 0.00464 | 7.62  |
| 137 | 744.86 | 0.00705 | 5.25 | 341 | 1648.61 | 0.00857 | 14.13 |
| 138 | 750.54 | 0       | 0    | 342 | 1648.65 | 0       | 0     |
| 139 | 757.18 | 0       | 0    | 343 | 1653.99 | 0       | 0     |
| 140 | 759.77 | 0.00032 | 0.25 | 344 | 1654.52 | 0.00039 | 0.65  |
| 141 | 763.2  | 0       | 0    | 345 | 1666.28 | 0       | 0     |
| 142 | 764.56 | 0.00063 | 0.49 | 346 | 1667.17 | 0.00342 | 5.7   |
| 143 | 768.96 | 0.00103 | 0.79 | 347 | 1672.08 | 0       | 0     |
| 144 | 770.09 | 0       | 0    | 348 | 1672.3  | 0.00102 | 1.71  |
| 145 | 773.06 | 0.00148 | 1.14 | 349 | 3040.67 | 0       | 0     |
| 146 | 774.28 | 0       | 0    | 350 | 3040.68 | 0.00001 | 0.02  |
| 147 | 777.09 | 0.00888 | 6.9  | 351 | 3042.05 | 0       | 0     |
| 148 | 782.14 | 0       | 0    | 352 | 3042.05 | 0       | 0     |
| 149 | 782.89 | 0.00002 | 0.01 | 353 | 3042.3  | 0       | 0     |
| 150 | 795.48 | 0.00705 | 5.61 | 354 | 3042.31 | 0       | 0     |
| 151 | 803.33 | 0       | 0    | 355 | 3042.72 | 0       | 0     |
| 152 | 809.28 | 0       | 0    | 356 | 3042.74 | 0.00001 | 0.02  |
| 153 | 809.72 | 0.00353 | 2.86 | 357 | 3050.16 | 0       | 0     |
| 154 | 820.36 | 0.00078 | 0.64 | 358 | 3050.18 | 0.00002 | 0.05  |
| 155 | 820.83 | 0       | 0    | 359 | 3050.56 | 0       | 0     |
| 156 | 829.7  | 0       | 0    | 360 | 3050.59 | 0.00016 | 0.49  |
| 157 | 844.63 | 0.00032 | 0.27 | 361 | 3105.77 | 0       | 0     |
| 158 | 849.86 | 0       | 0    | 362 | 3105.78 | 0       | 0     |
| 159 | 850.38 | 0.00015 | 0.12 | 363 | 3106.45 | 0       | 0     |
| 160 | 858.33 | 0       | 0    | 364 | 3106.46 | 0       | 0     |

|     |         |         |      |     |         |         |      |
|-----|---------|---------|------|-----|---------|---------|------|
| 161 | 858.36  | 0.0061  | 5.23 | 365 | 3107.08 | 0       | 0    |
| 162 | 872     | 0       | 0    | 366 | 3107.08 | 0       | 0    |
| 163 | 872.15  | 0.00011 | 0.09 | 367 | 3107.87 | 0       | 0    |
| 164 | 883.2   | 0       | 0    | 368 | 3107.87 | 0       | 0    |
| 165 | 894.23  | 0       | 0    | 369 | 3114.1  | 0       | 0    |
| 166 | 894.63  | 0.00088 | 0.79 | 370 | 3114.15 | 0       | 0.01 |
| 167 | 895.22  | 0       | 0    | 371 | 3114.16 | 0       | 0    |
| 168 | 896.05  | 0.00091 | 0.82 | 372 | 3114.18 | 0       | 0    |
| 169 | 901.78  | 0       | 0    | 373 | 3115.85 | 0       | 0    |
| 170 | 901.82  | 0.00006 | 0.06 | 374 | 3115.92 | 0       | 0.02 |
| 171 | 921.18  | 0.00046 | 0.42 | 375 | 3118.51 | 0       | 0    |
| 172 | 921.27  | 0       | 0    | 376 | 3118.51 | 0       | 0    |
| 173 | 928.82  | 0       | 0    | 377 | 3120.59 | 0       | 0    |
| 174 | 929.99  | 0.00008 | 0.07 | 378 | 3120.6  | 0       | 0    |
| 175 | 932.59  | 0       | 0    | 379 | 3121.18 | 0       | 0    |
| 176 | 932.63  | 0       | 0    | 380 | 3121.19 | 0.00001 | 0.04 |
| 177 | 934.16  | 0       | 0    | 381 | 3122.86 | 0       | 0.01 |
| 178 | 934.26  | 0.00001 | 0.01 | 382 | 3122.86 | 0       | 0    |
| 179 | 936.69  | 0       | 0    | 383 | 3123.23 | 0       | 0    |
| 180 | 936.71  | 0.00001 | 0.01 | 384 | 3123.27 | 0       | 0.01 |
| 181 | 938.01  | 0       | 0    | 385 | 3185.48 | 0       | 0    |
| 182 | 938.37  | 0.00001 | 0.01 | 386 | 3185.48 | 0       | 0.01 |
| 183 | 941.61  | 0       | 0    | 387 | 3186.85 | 0       | 0    |
| 184 | 943.05  | 0       | 0    | 388 | 3186.86 | 0.00006 | 0.18 |
| 185 | 947.87  | 0.00001 | 0.01 | 389 | 3194.65 | 0       | 0    |
| 186 | 947.91  | 0       | 0    | 390 | 3194.66 | 0       | 0.01 |
| 187 | 949.74  | 0.00005 | 0.05 | 391 | 3196.33 | 0       | 0    |
| 188 | 950.37  | 0       | 0    | 392 | 3196.34 | 0.00001 | 0.04 |
| 189 | 961.04  | 0.00001 | 0.01 | 393 | 3196.42 | 0       | 0.01 |
| 190 | 961.36  | 0       | 0    | 394 | 3196.42 | 0       | 0    |
| 191 | 973.16  | 0.00002 | 0.02 | 395 | 3202.3  | 0       | 0    |
| 192 | 973.21  | 0       | 0    | 396 | 3202.33 | 0.00002 | 0.07 |
| 193 | 973.68  | 0       | 0    | 397 | 3209.95 | 0       | 0    |
| 194 | 973.73  | 0       | 0    | 398 | 3210    | 0.00005 | 0.15 |
| 195 | 975.14  | 0       | 0    | 399 | 3216.8  | 0       | 0    |
| 196 | 975.14  | 0       | 0    | 400 | 3216.81 | 0.00002 | 0.05 |
| 197 | 975.65  | 0.00297 | 2.9  | 401 | 3227.48 | 0       | 0    |
| 198 | 980.98  | 0       | 0    | 402 | 3227.51 | 0.00001 | 0.03 |
| 199 | 994.43  | 0       | 0    | 403 | 3242.56 | 0       | 0    |
| 200 | 994.48  | 0.00037 | 0.37 | 404 | 3242.57 | 0.00005 | 0.18 |
| 201 | 1027.57 | 0       | 0    | 405 | 3247.78 | 0       | 0    |
| 202 | 1027.9  | 0.00737 | 7.58 | 406 | 3247.78 | 0       | 0    |
| 203 | 1052.03 | 0.00034 | 0.35 | 407 | 3259.87 | 0       | 0    |

|     |        |   |   |     |         |         |      |
|-----|--------|---|---|-----|---------|---------|------|
| 204 | 1052.9 | 0 | 0 | 408 | 3259.87 | 0.00001 | 0.04 |
|-----|--------|---|---|-----|---------|---------|------|

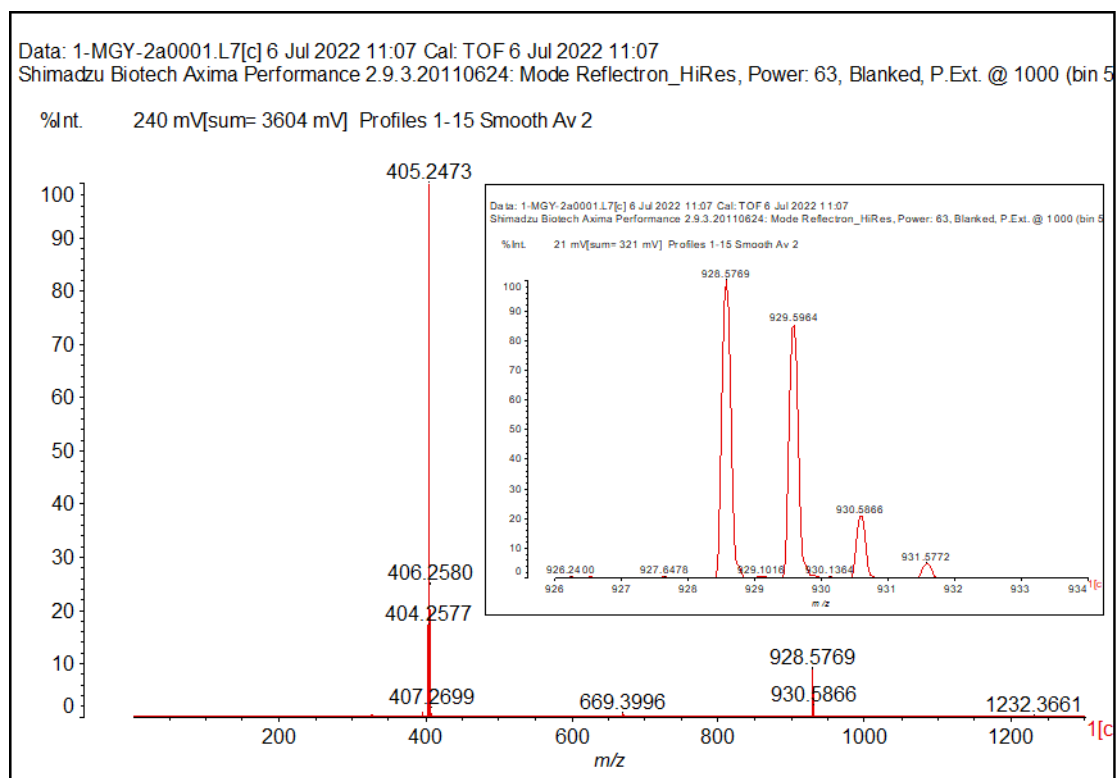

Figure S27. Mass spectrometry of 2a.

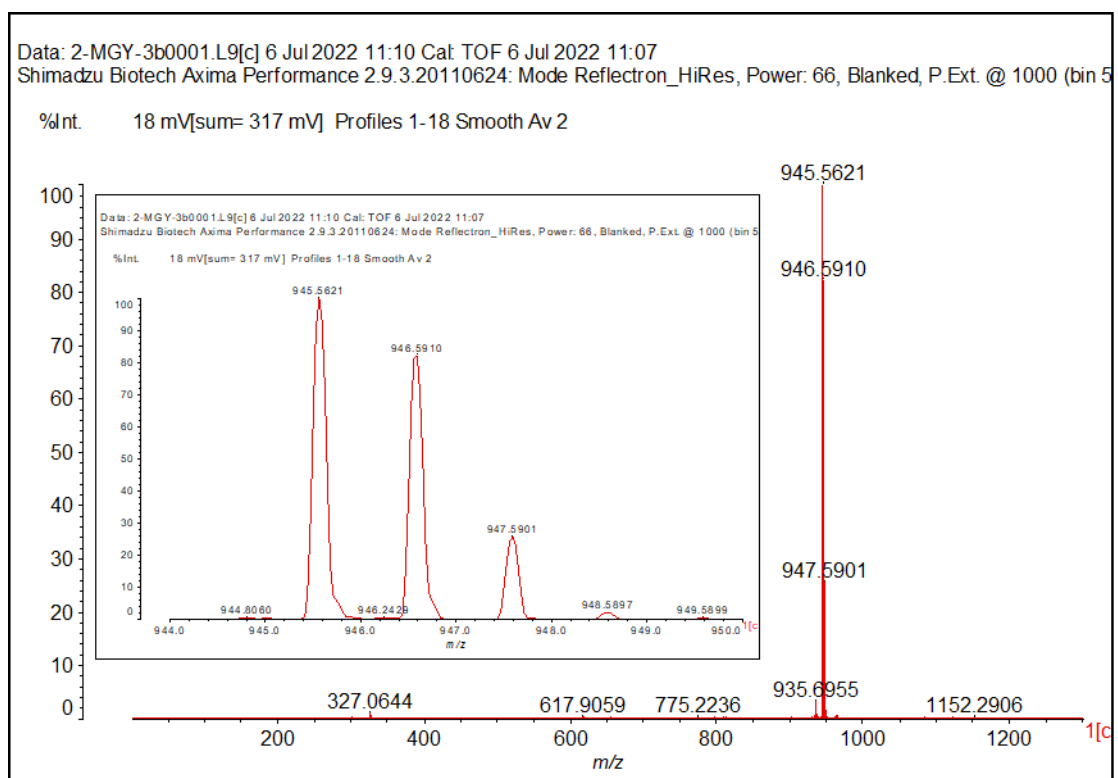

Figure S28. Mass spectrometry of 3b.



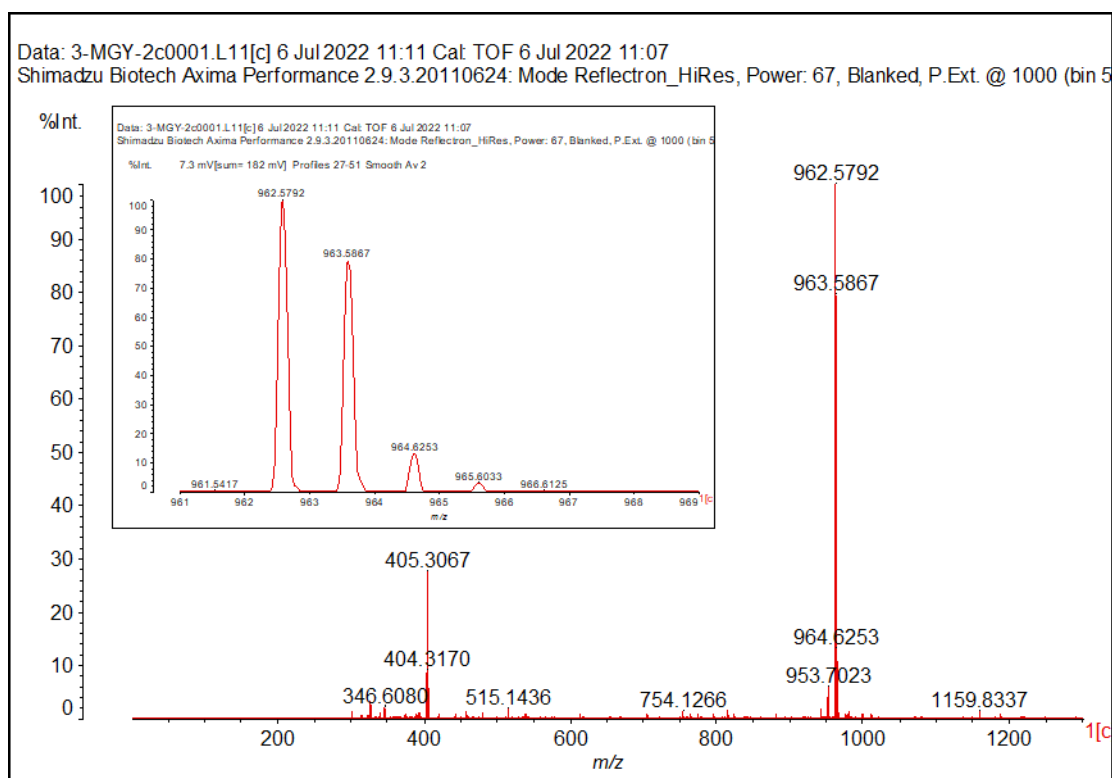

Figure S29. Mass spectrometry of **2c**.

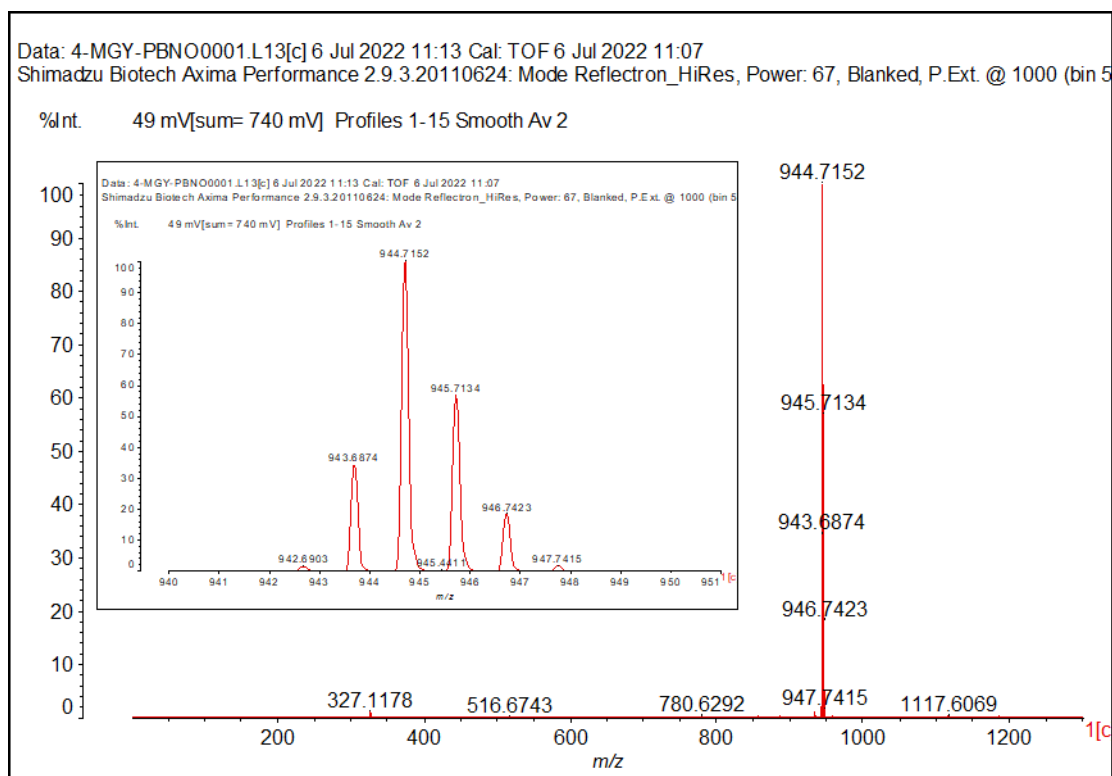

Figure S30. Mass spectrometry of **p[B-N]O**.

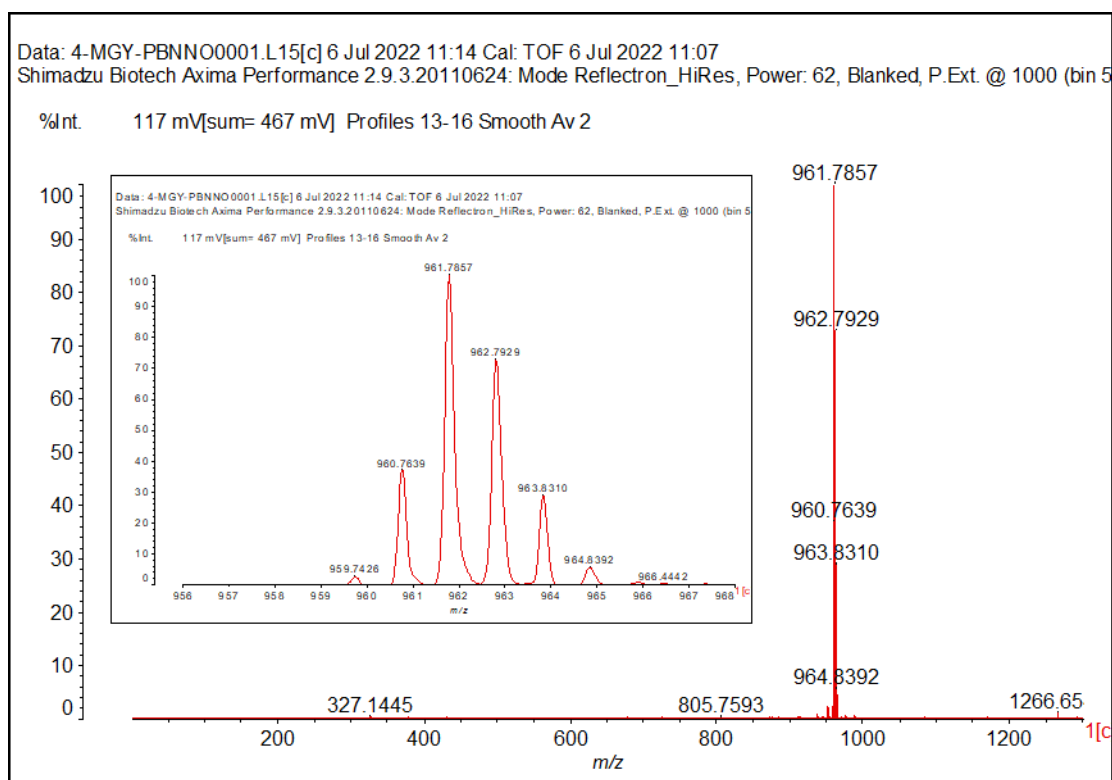

Figure S31. Mass spectrometry of p[B-N]NO.

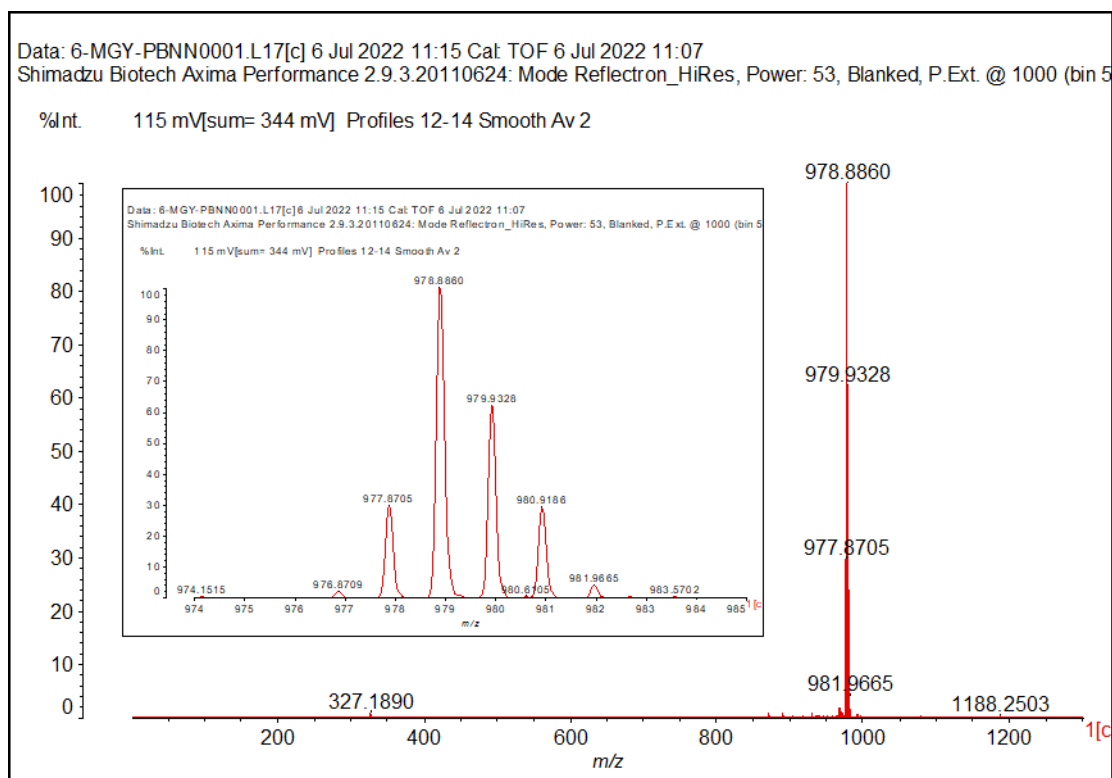

Figure S32. Mass spectrometry of p[B-N]N.

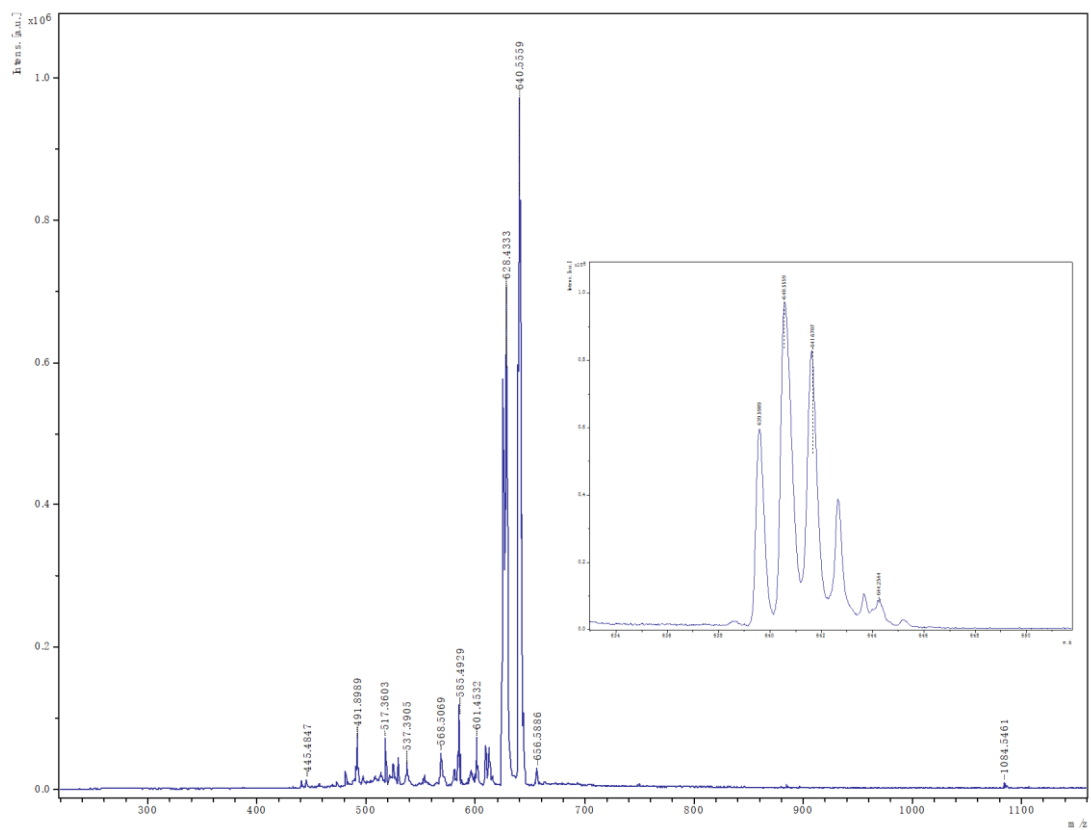

Figure S33. Mass spectrometry of [B-N]N.

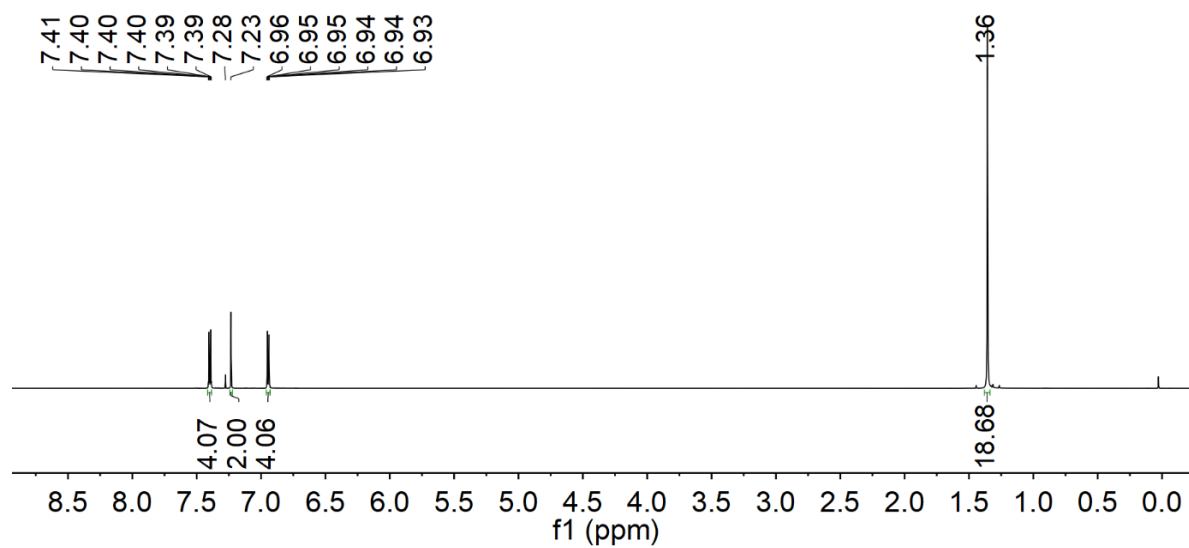

Figure S34. <sup>1</sup>H NMR spectrum of **1a** in CDCl<sub>3</sub>.

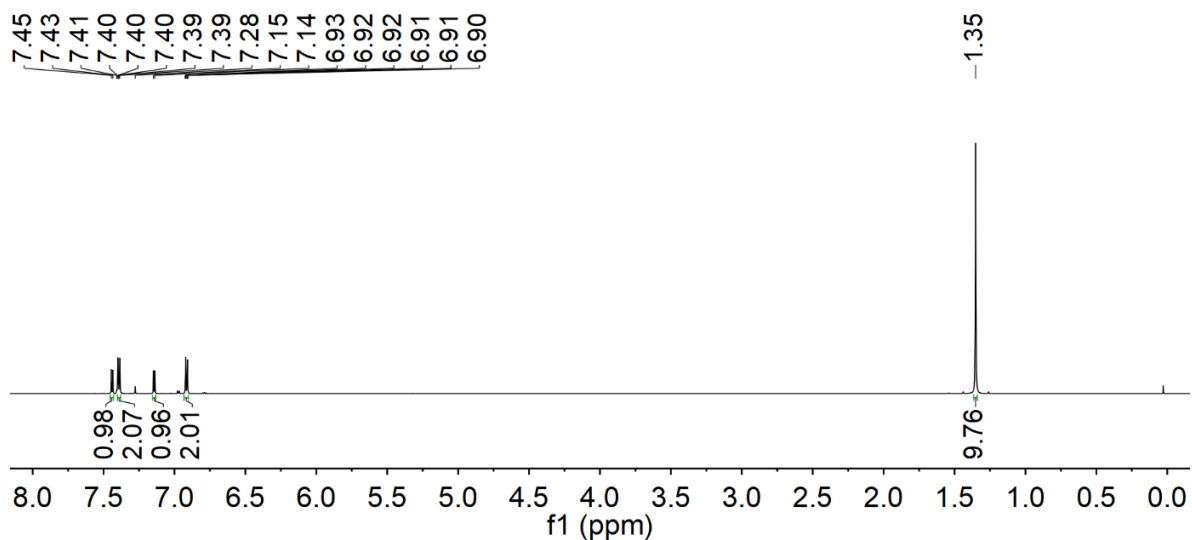

Figure S35.  $^1\text{H}$  NMR spectrum of **1b** in  $\text{CDCl}_3$ .

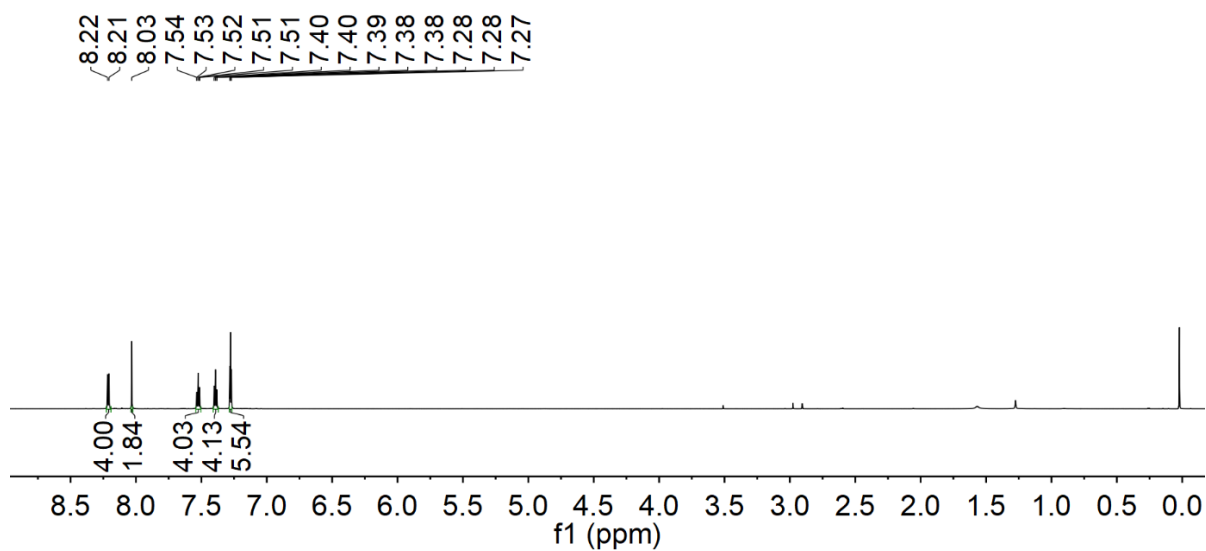

Figure S36.  $^1\text{H}$  NMR spectrum of **1c** in  $\text{CDCl}_3$ .

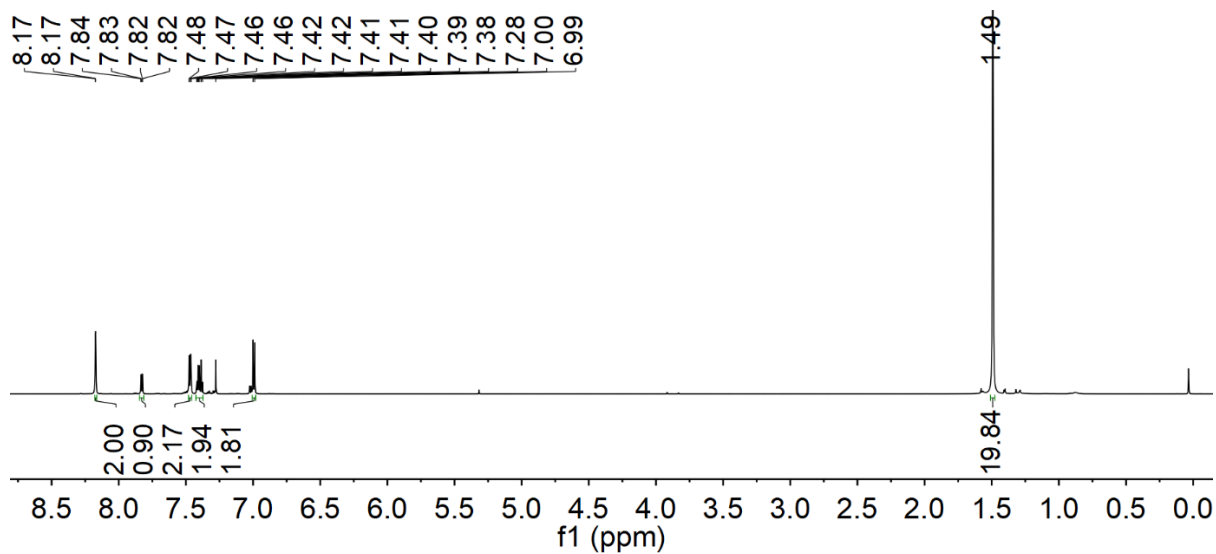

Figure S37.  $^1\text{H}$  NMR spectrum of **1d** in  $\text{CDCl}_3$ .

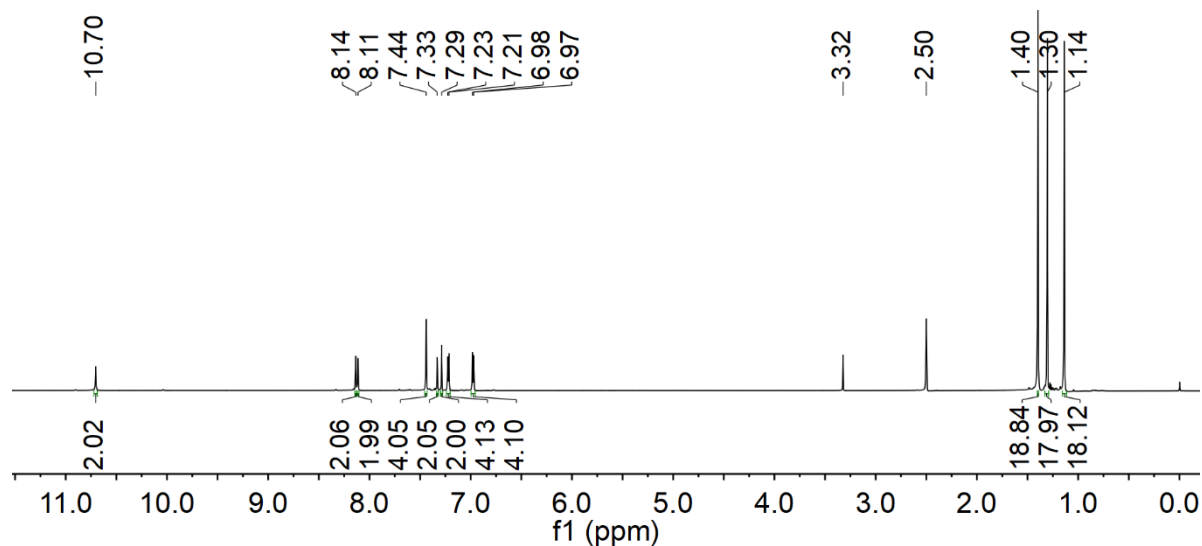

**Figure S38.**  $^1\text{H}$  NMR spectrum of m **2a** in  $\text{DMSO-d}_6$ .

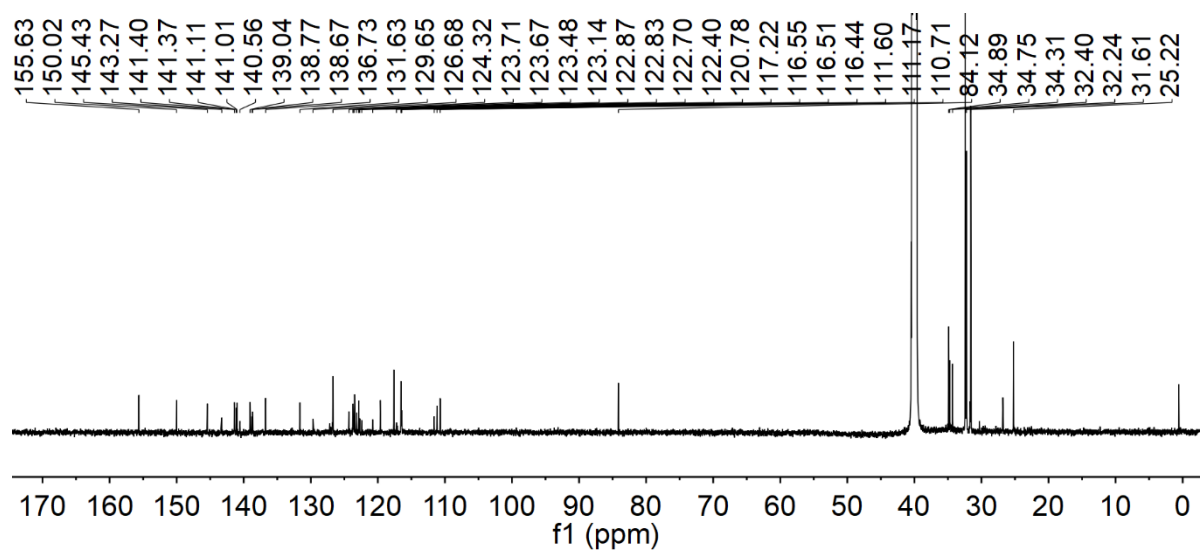

**Figure S39.**  $^{13}\text{C}$  NMR spectrum of m **2a** in  $\text{DMSO-d}_6$ .

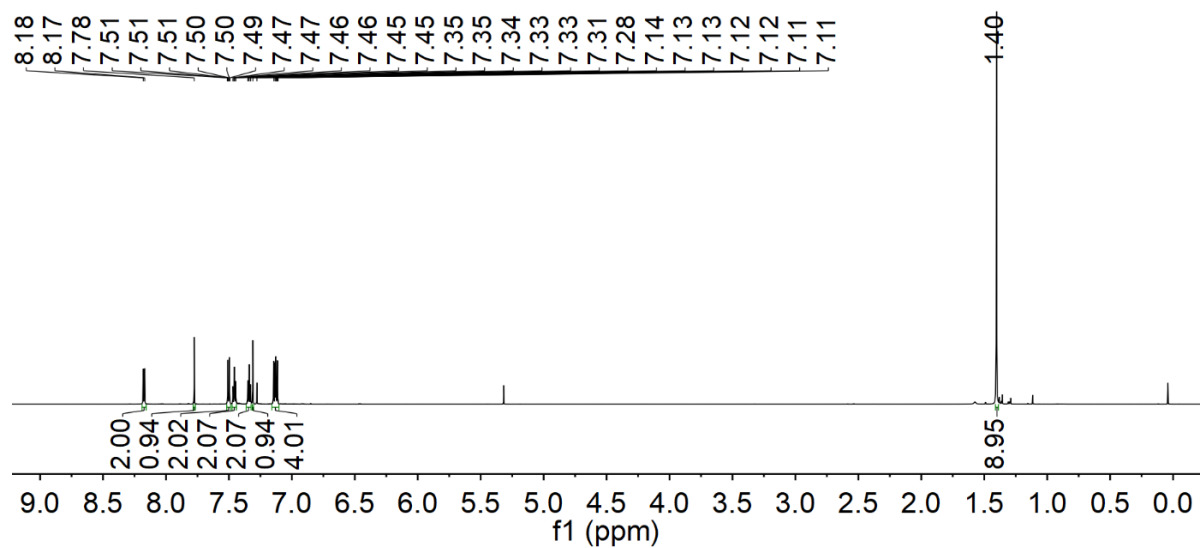

**Figure S40.**  $^1\text{H}$  NMR spectrum of m **2b** in  $\text{CDCl}_3$ .

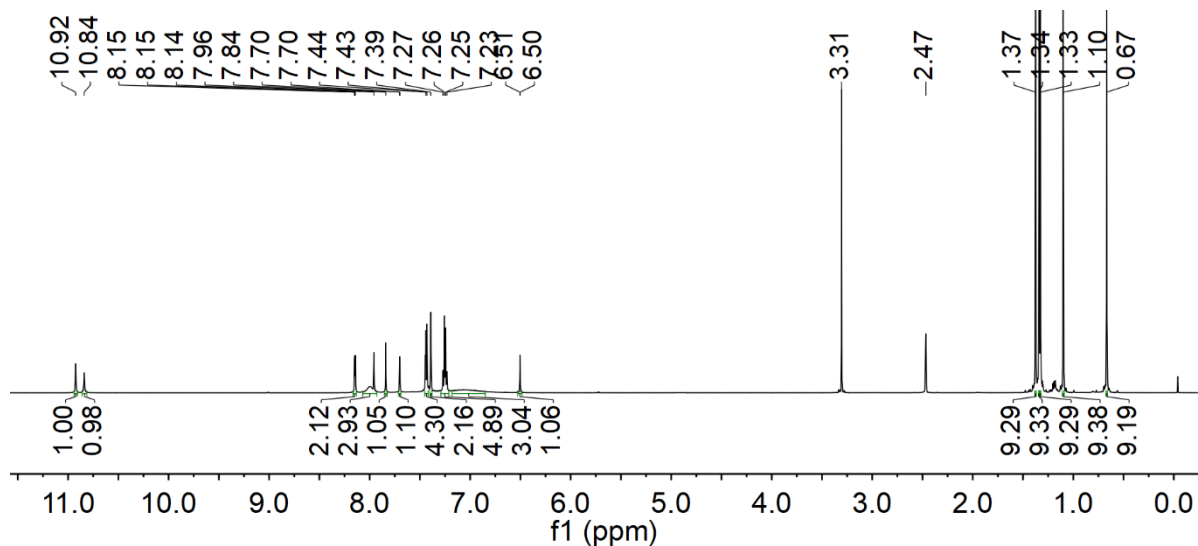

**Figure S41.**  $^1\text{H}$  NMR spectrum of m **3b** in  $\text{DMSO-d}_6$ .

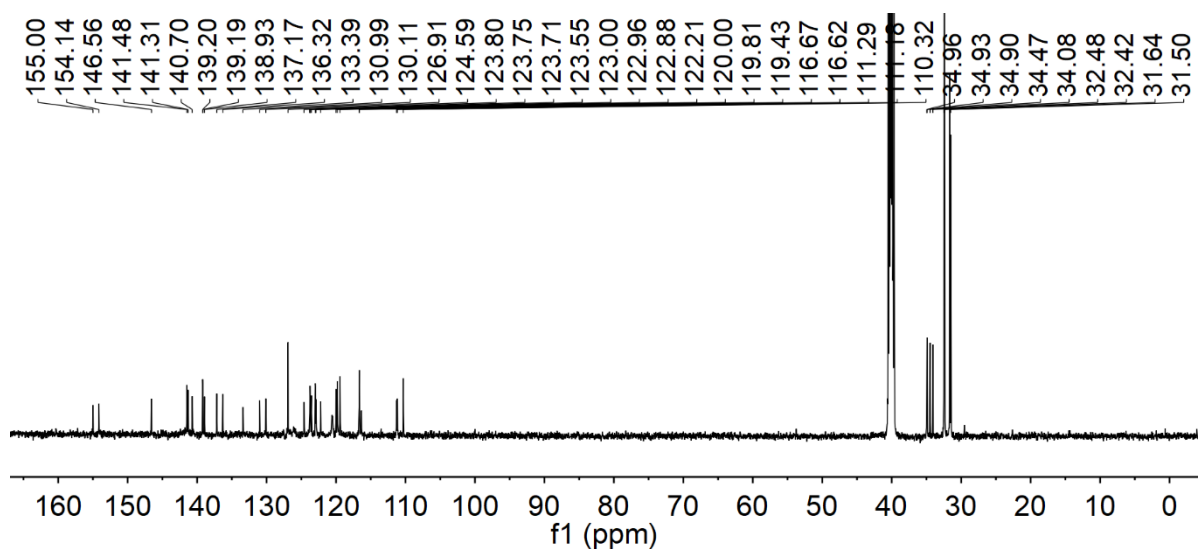

**Figure S42.**  $^{13}\text{C}$  NMR spectrum of m **3b** in  $\text{DMSO-d}_6$ .

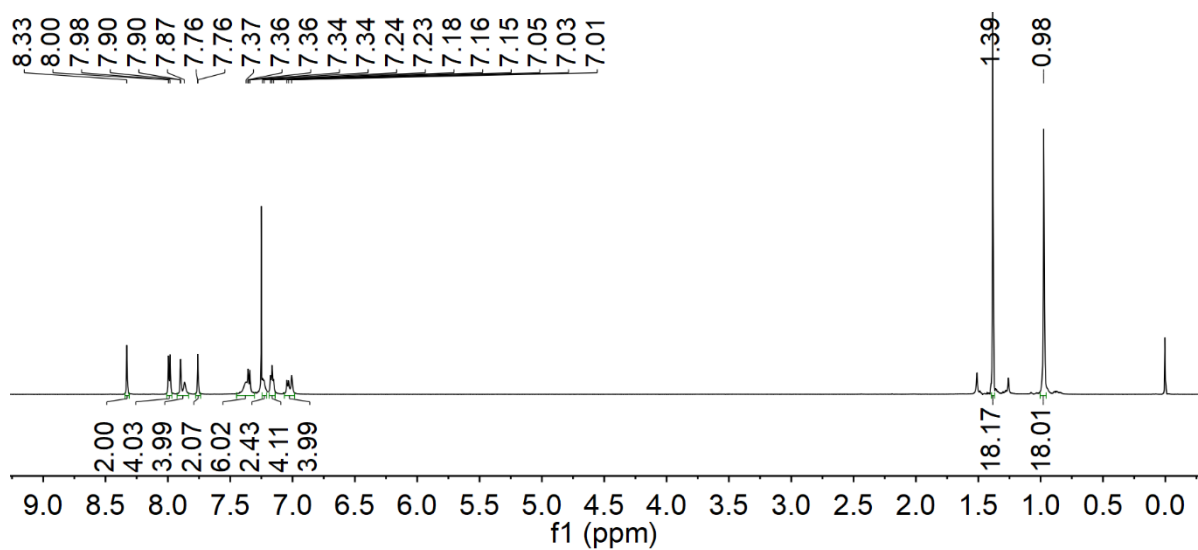

**Figure S43.**  $^1\text{H}$  NMR spectrum of m **2c** in  $\text{CDCl}_3$ .

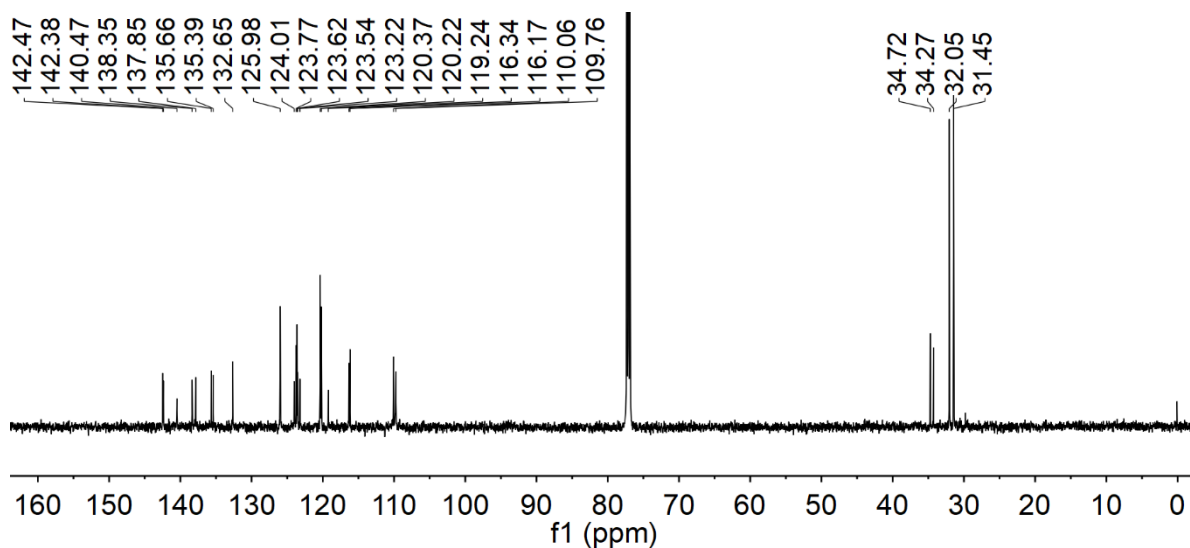

**Figure S44.** <sup>13</sup>C NMR spectrum of m **2c** in CDCl<sub>3</sub>.

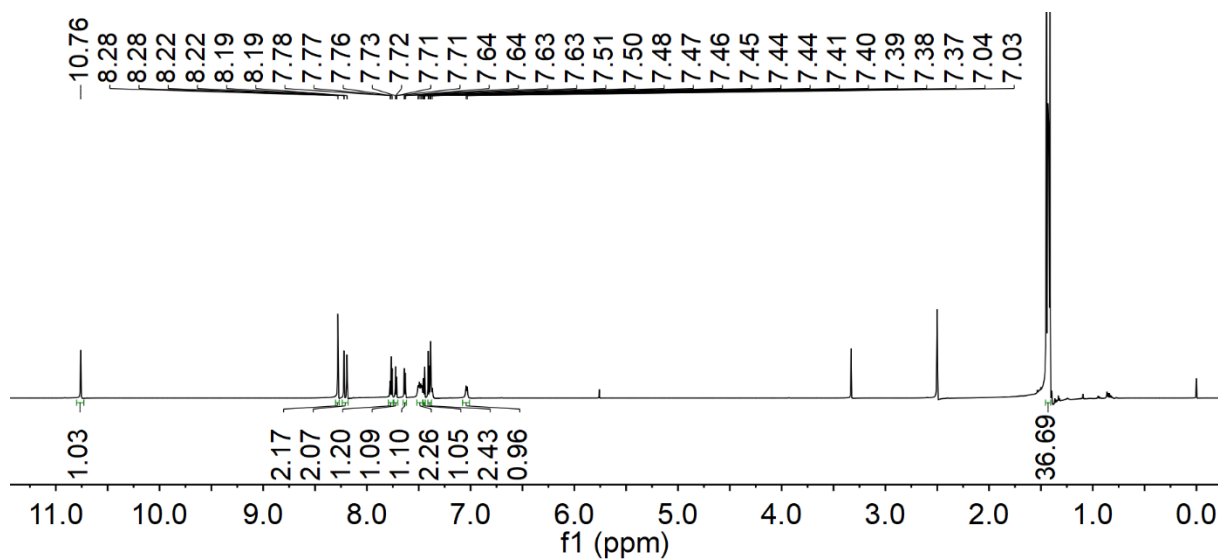

**Figure S45.** <sup>1</sup>H NMR spectrum of m **2d** in DMSO-d<sub>6</sub>.

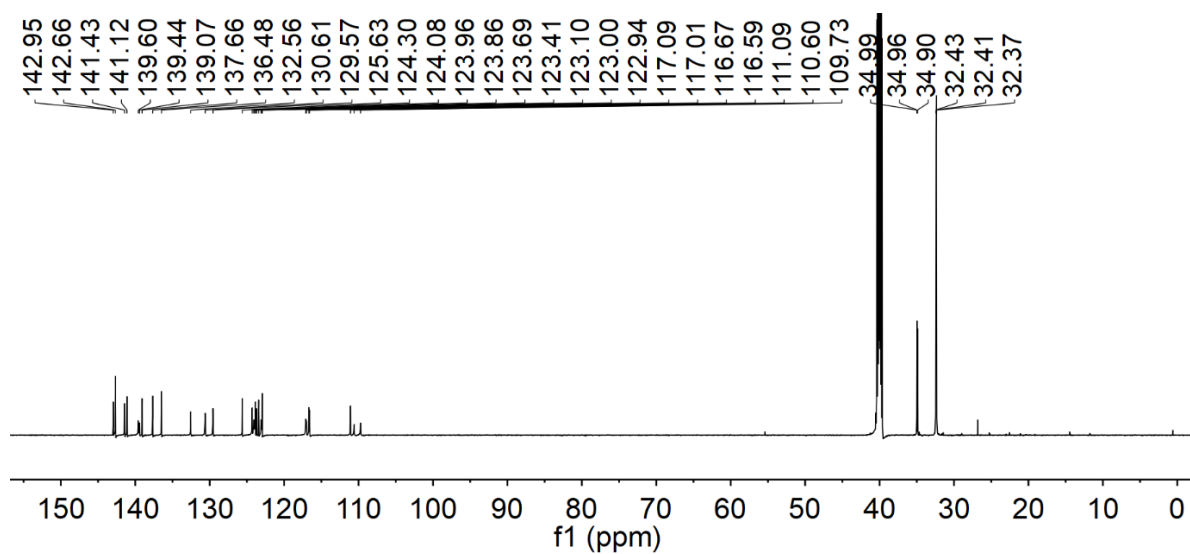

**Figure S46.** <sup>13</sup>C NMR spectrum of m **2d** in DMSO-d<sub>6</sub>.

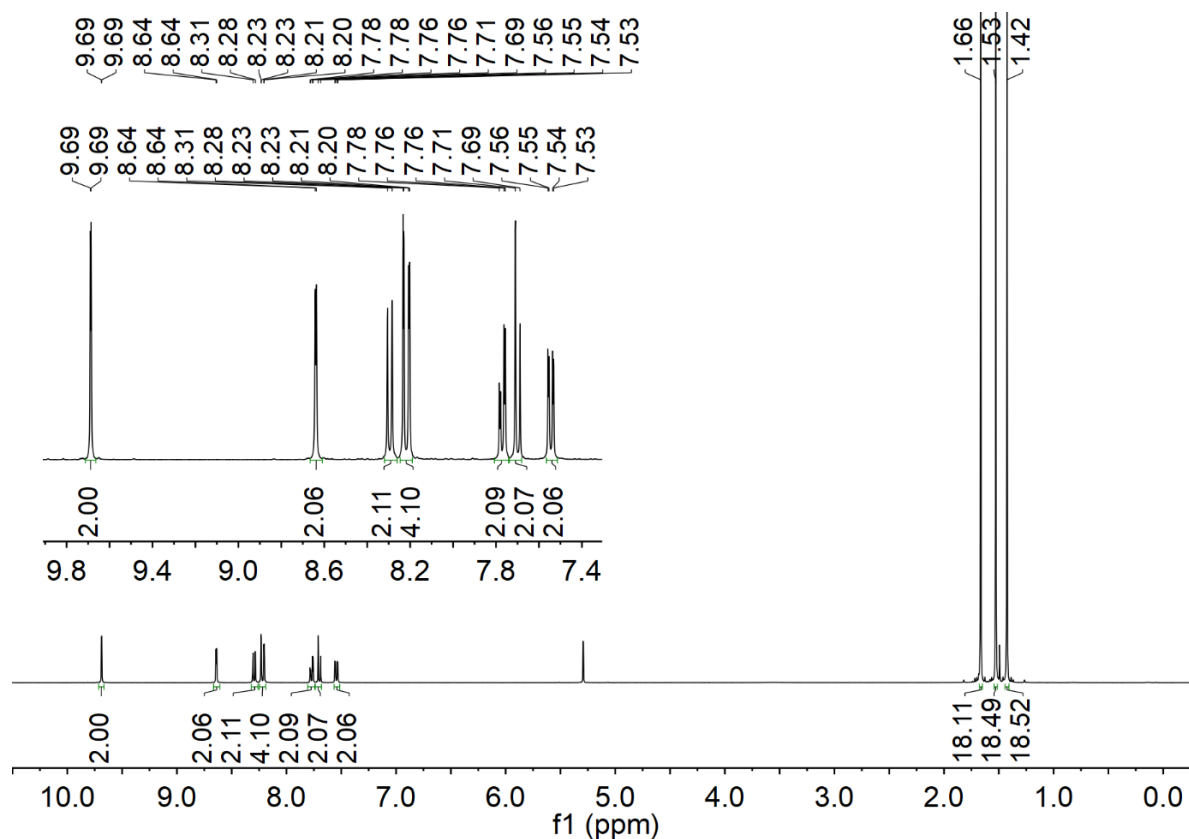

**Figure S47.**  $^1\text{H}$  NMR spectrum of **p[B-N]O** in  $\text{CD}_2\text{Cl}_2$ .

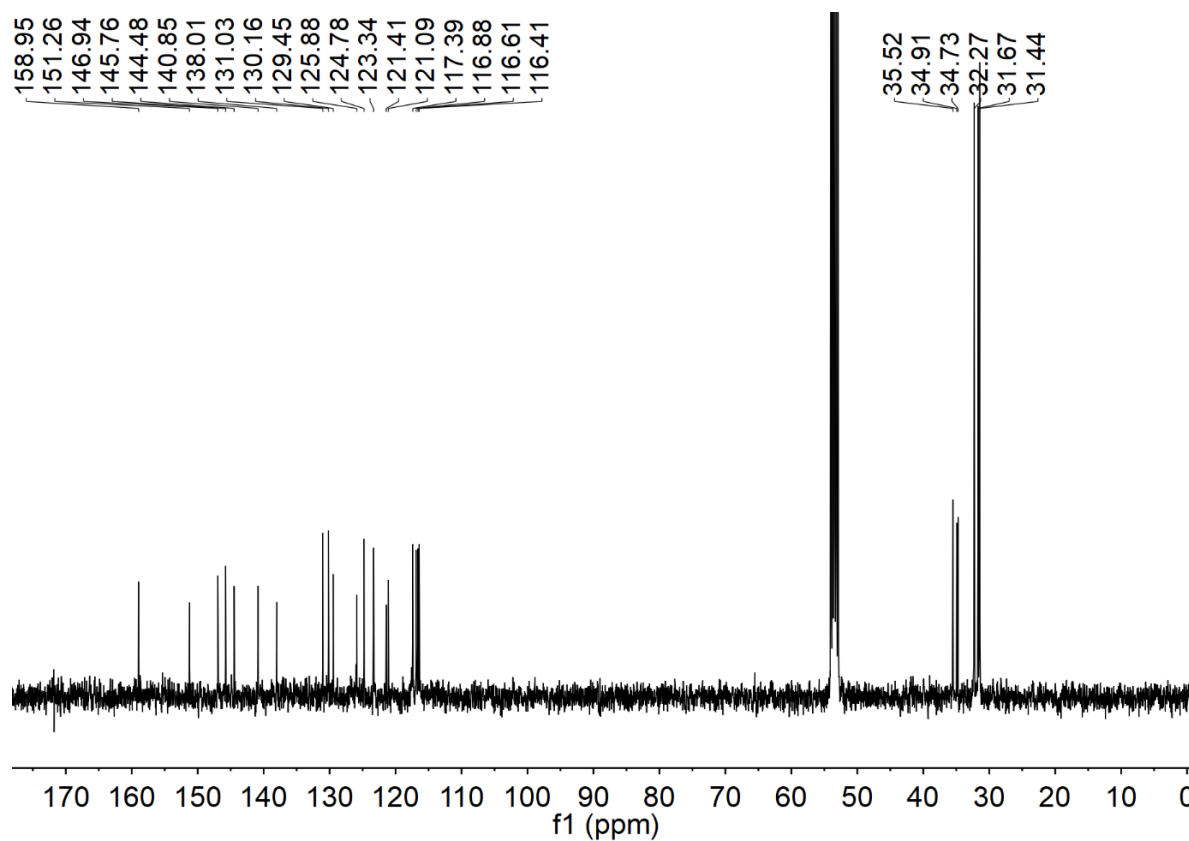

**Figure S48.**  $^{13}\text{C}$  NMR spectrum of **p[B-N]O** in  $\text{CD}_2\text{Cl}_2$ .



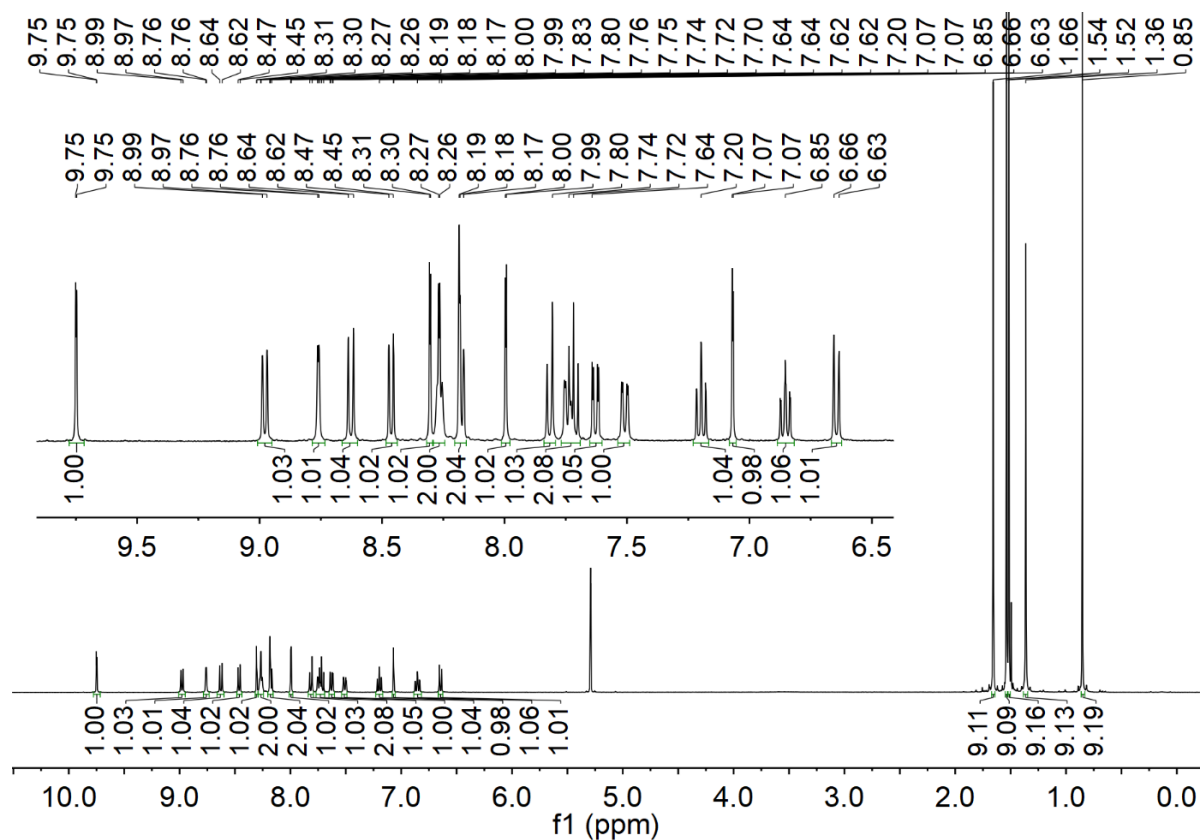

Figure S49.  $^1\text{H}$  NMR spectrum of  $\text{p}[\text{B-N}]\text{NO}$  in  $\text{CD}_2\text{Cl}_2$ .

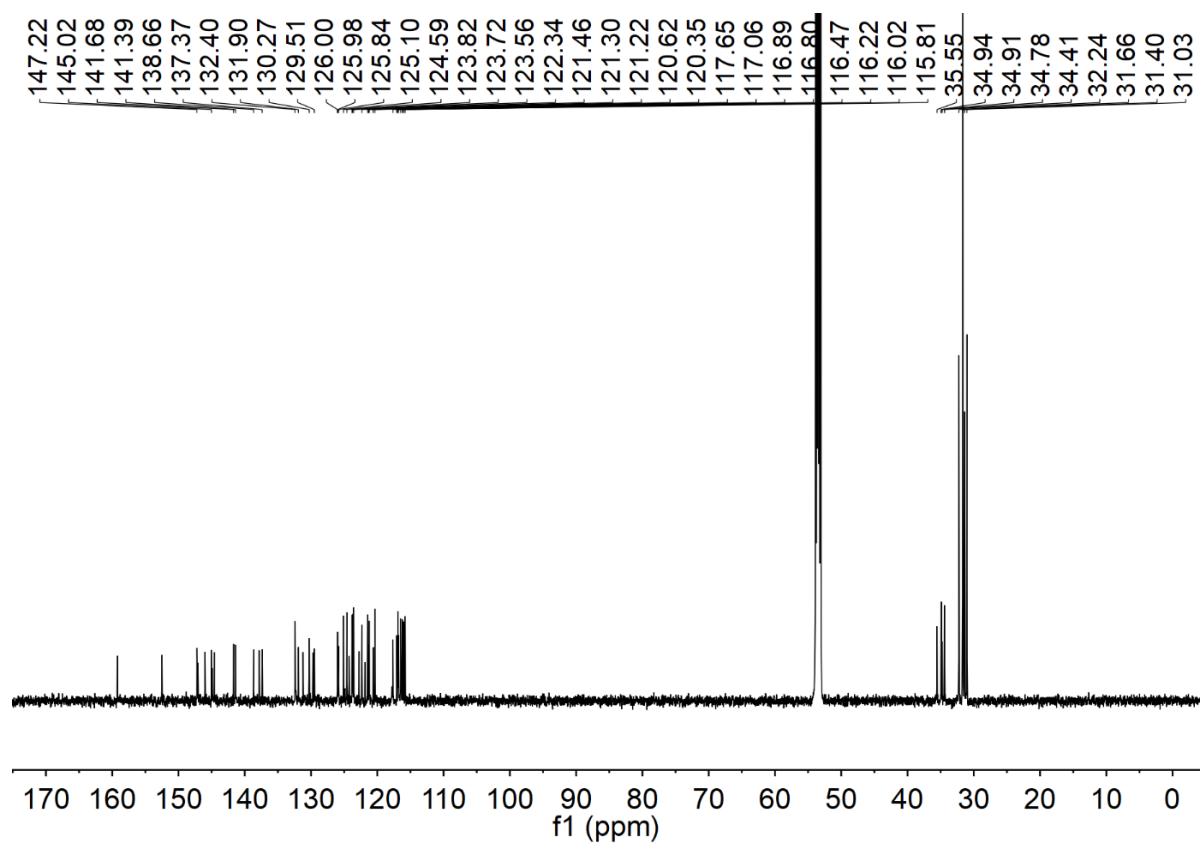

Figure S50.  $^{13}\text{C}$  NMR spectrum of  $\text{p}[\text{B-N}]\text{NO}$  in  $\text{CD}_2\text{Cl}_2$ .

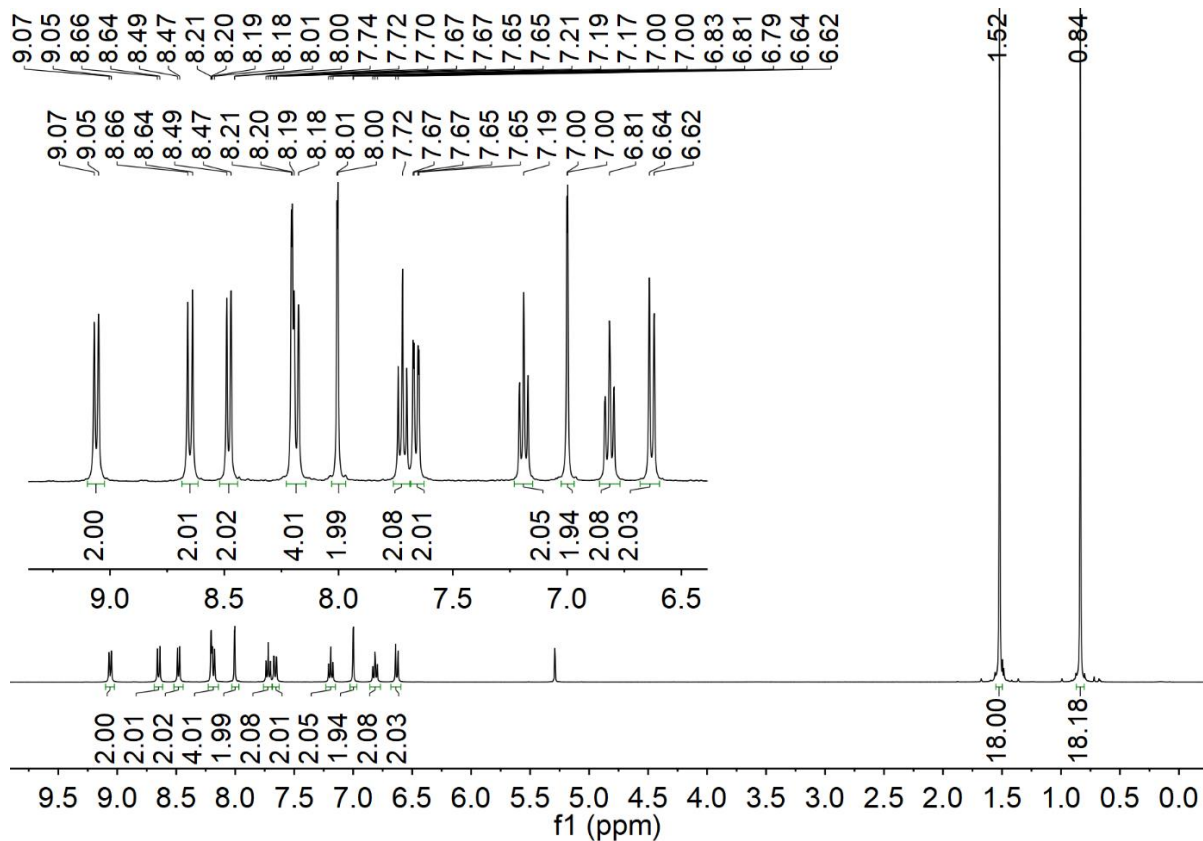

**Figure S51.**  $^1\text{H}$  NMR spectrum of p[B-N]N in  $\text{CD}_2\text{Cl}_2$ .

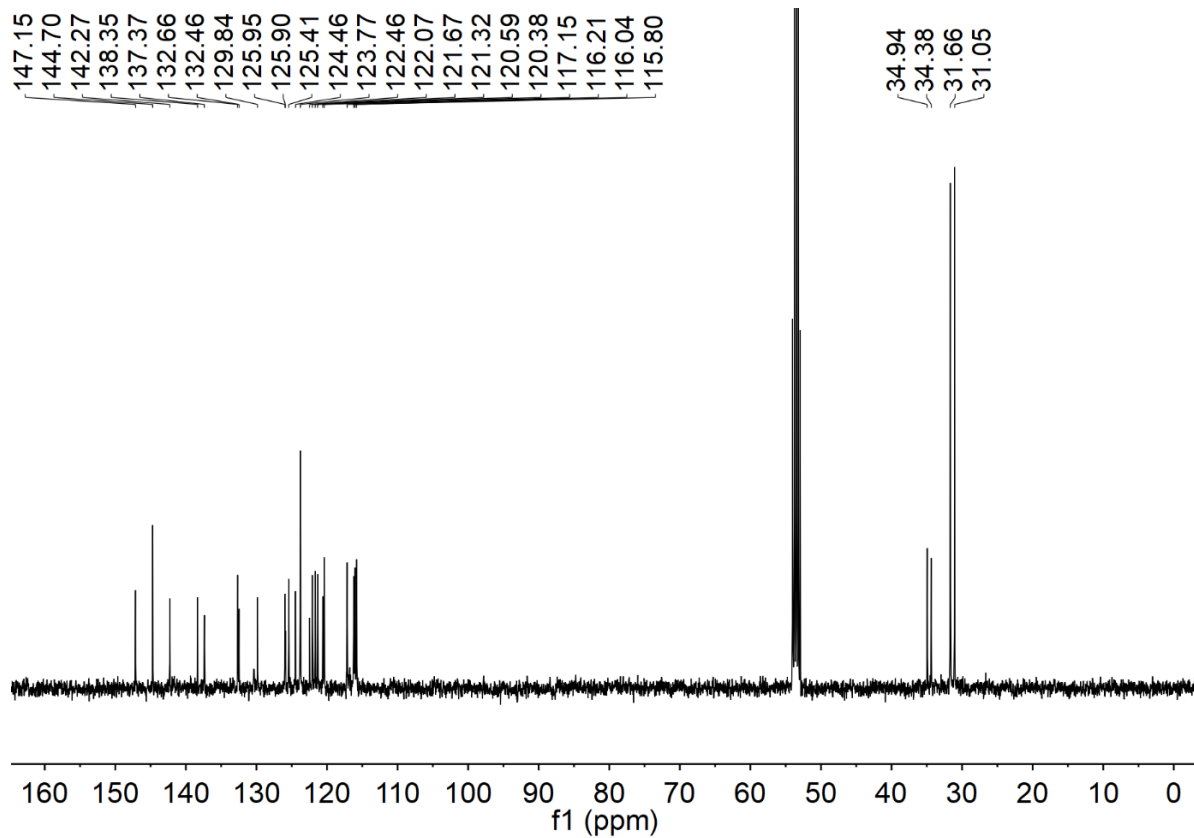

**Figure S52.**  $^{13}\text{C}$  NMR spectrum of p[B-N]N in  $\text{CD}_2\text{Cl}_2$ .

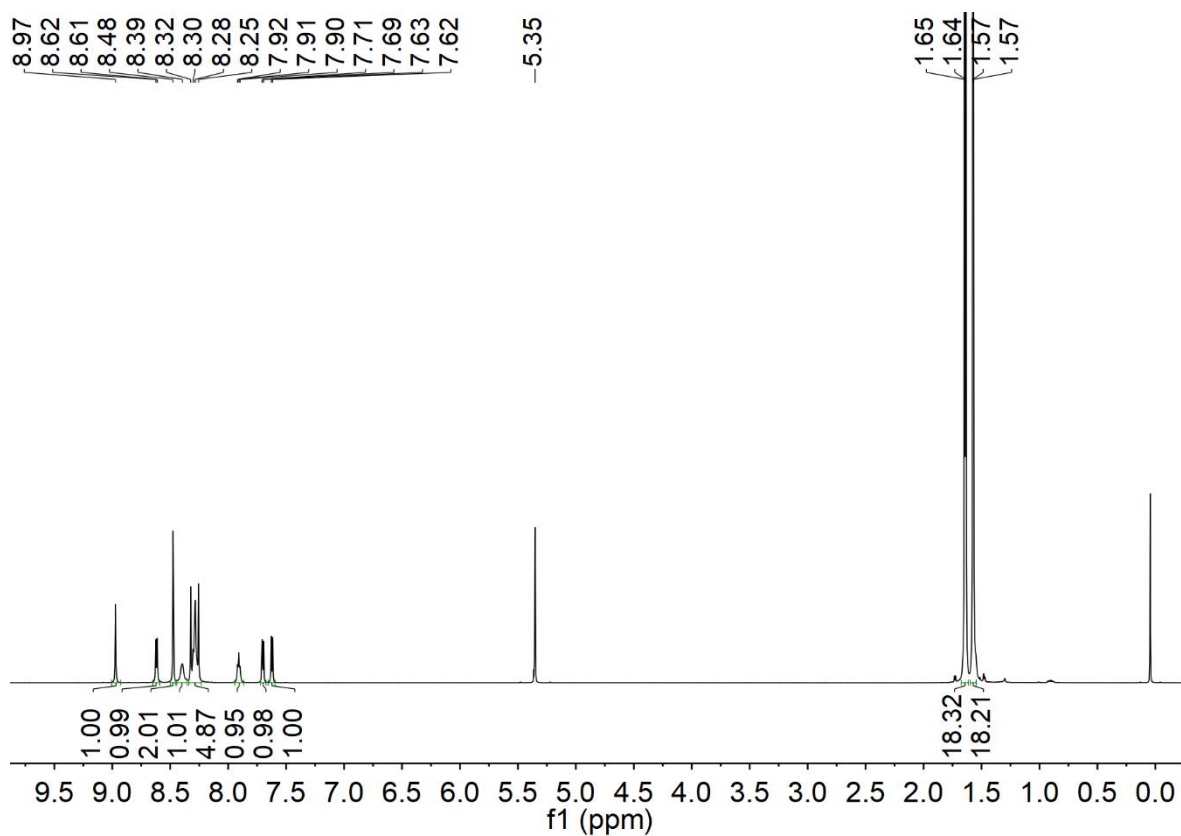

**Figure S53.**  $^1\text{H}$  NMR spectrum of  $[\text{B-N}]\text{N}$  in  $\text{CD}_2\text{Cl}_2$ .

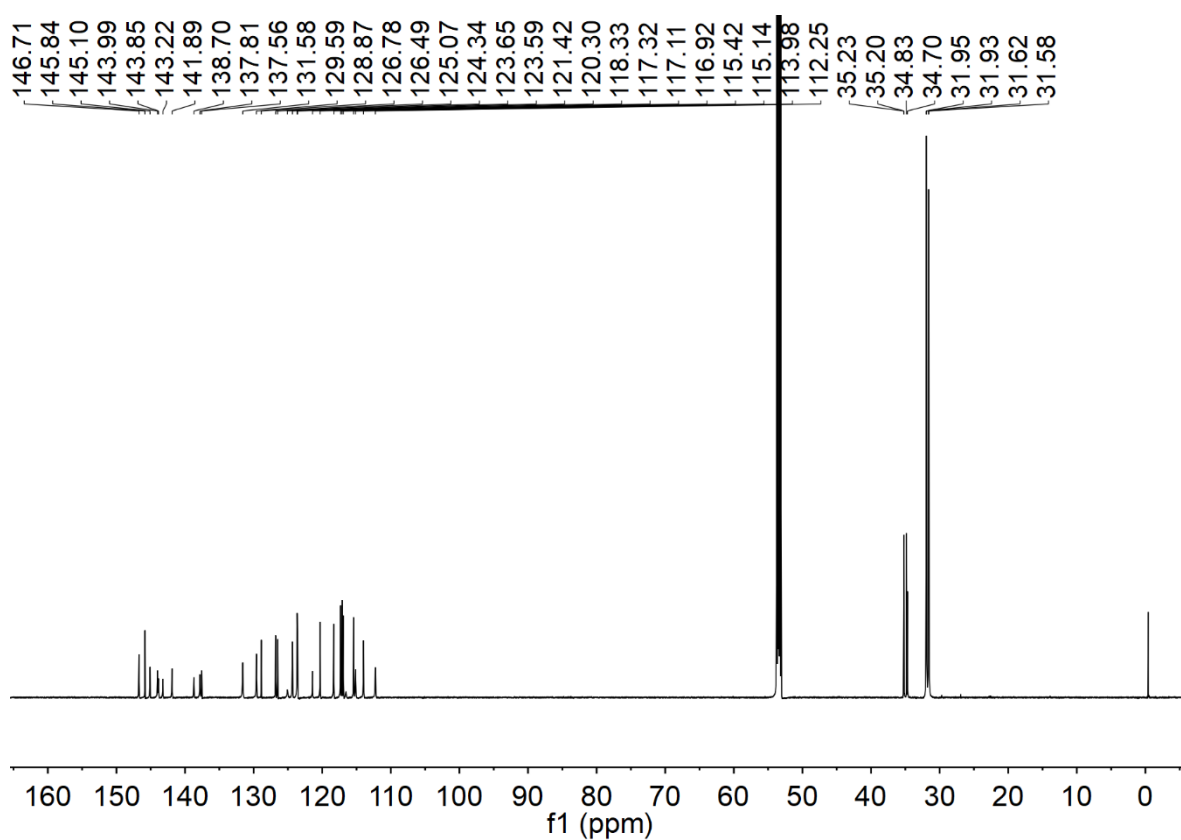

**Figure S54.**  $^{13}\text{C}$  NMR spectrum of  $[\text{B-N}]\text{N}$  in  $\text{CD}_2\text{Cl}_2$ .

### 3. Reference

- [1] J.-D. Chai and M. H.-Gordon, *Phys. Chem. Chem. Phys.*, 2008, 10, 6615.
- [2] L. Kronik, T. Stein, S. Refaely-Abramson, R. Baer, *J. Chem. Theory Comput.*, 2012, 8, 1515.
- [3] H. Sun, C. Zhong, J. L. Brédas, *J. Chem. Theory. Comput.*, 2015, 11, 3851.
- [4] F. Santoro, A. Lami, R. Improta, J. Bloino, and V. Barone. *J. Chem. Phys.*, 2008, 128, 224311.
- [5] Martin, R. L. Natural transition orbitals. *J. Chem. Phys.*, 2003, 118, 4775.
- [6] T. Lu, F. Chen, *J. Comput. Chem.* 2012, 33, 580.
- [7] W. Humphrey, A. Dalke, K. Schulten, *J. Mol. Graphics*, 1996, 14, 33-38.
- [8] Z. Shuai, *Chin. J. Chem.* 2020, 38, 1223.
- [9] P. Wei, D. Zhang, L. Duan, *Adv. Funct. Mater.* 2019, 30, 1907083.
- [10] D. Zhang, X. Song, A. J. Gillett, B. H. Drummond, S. T. E. Jones, G. Li, H. He, M. Cai, D. Credgington, L. Duan, *Adv. Mater.* 2020, 32, 1908355.
- [11] D. Zhang, M. Cai, Y. Zhang, D. Zhang, L. Duan, *Mater. Horiz.* 2016, 3, 145.
- [12] T. Huang, Q. Wang, S. Xiao, D. Zhang, Y. Zhang, C. Yin, D. Yang, D. Ma, Z. Wang, L. Duan, *Angew. Chem. Int. Ed.* 2021, 60, 23771.
- [13] H. Kaji, H. Suzuki, T. Fukushima, K. Shizu, K. Suzuki, S. Kubo, T. Komino, H. Oiwa, F. Suzuki, A. Wakamiya, Y. Murata, C. Adachi, *Nat. Commun.* 2015, 6, 8476.
